# Supplementary material for: RNA-seq profiles of chicken type II pneumocyte in response to Escherichia coli infection
Source: PubMed Central journal article supplement (PMC6550405; doi:10.1371/journal.pone.0217438), 2019-06-05
Supplement: pone.0217438.s002.pdf [file pone.0217438.s002.pdf]

# Quality Score

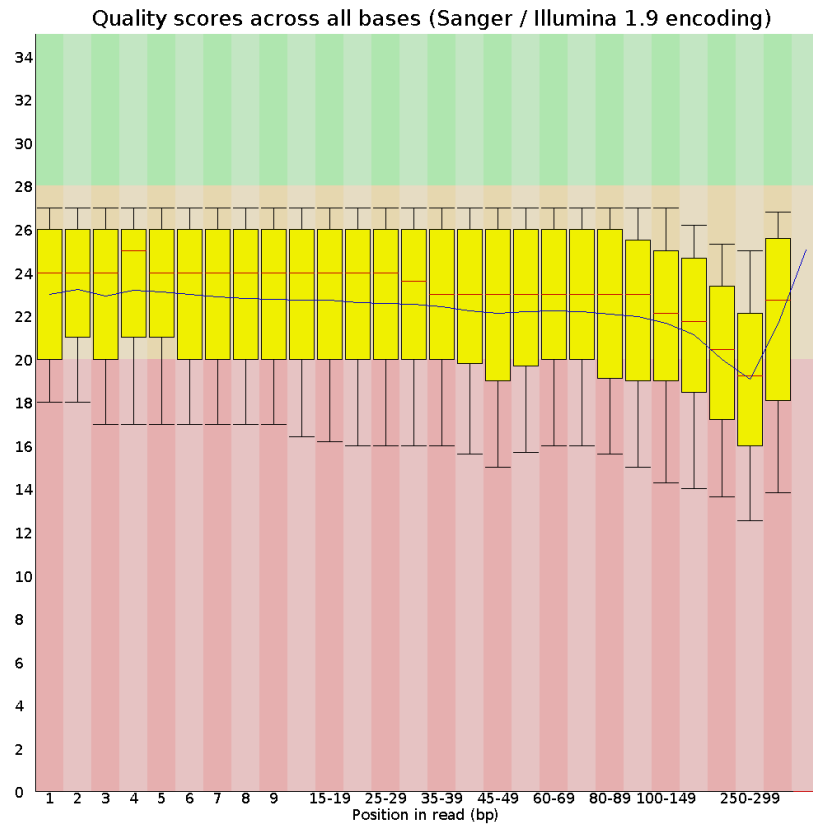

APEC infection 1 QualityScore\_AfterFilter

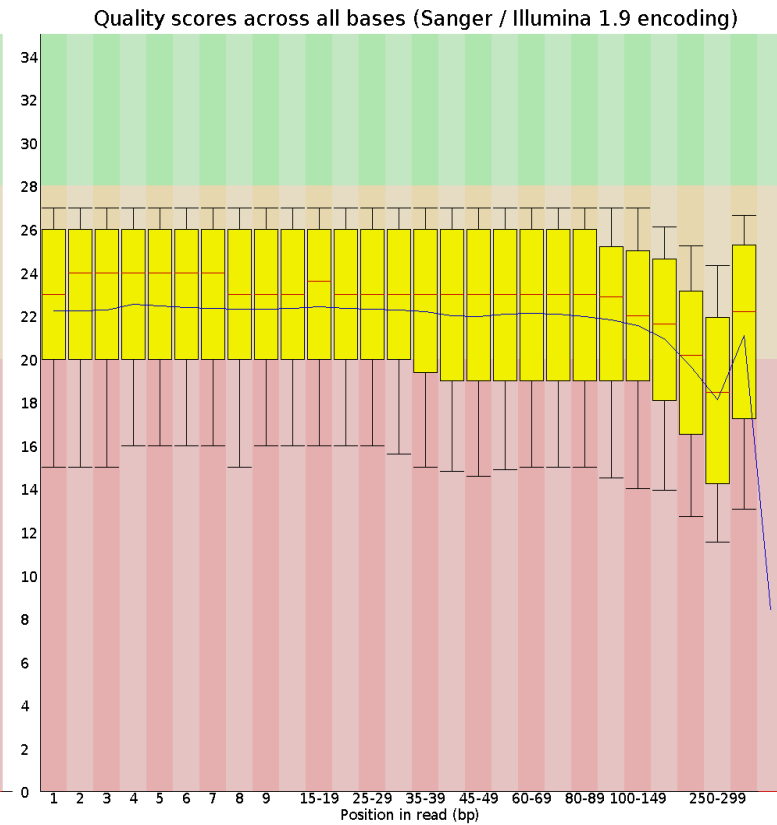

APEC infection 1 QualityScore\_BeforeFilter

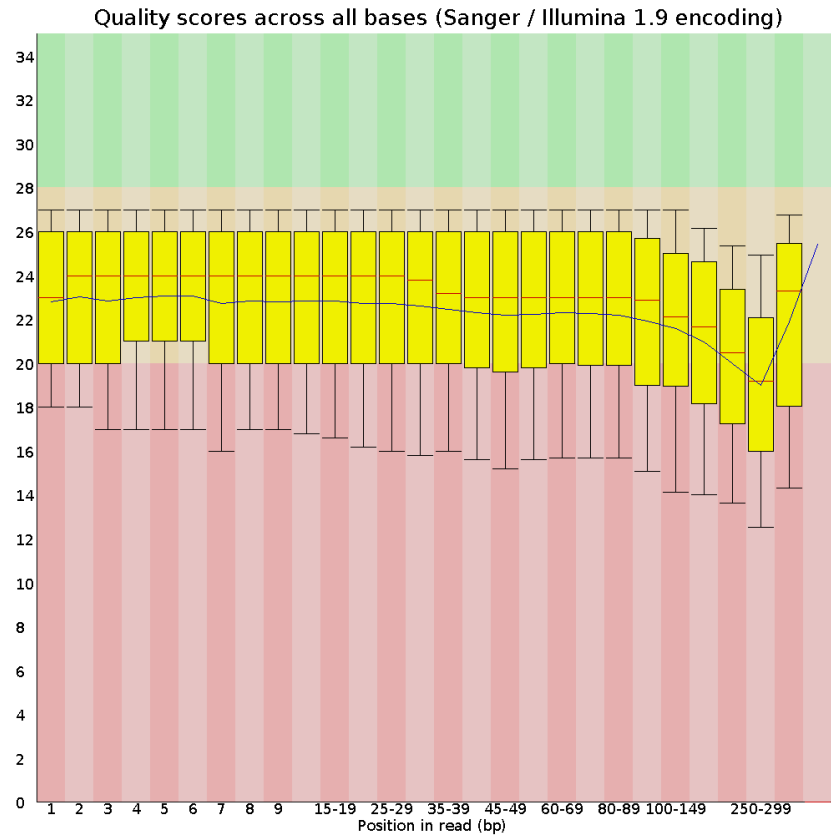

APEC infection2 QualityScore\_AfterFilter

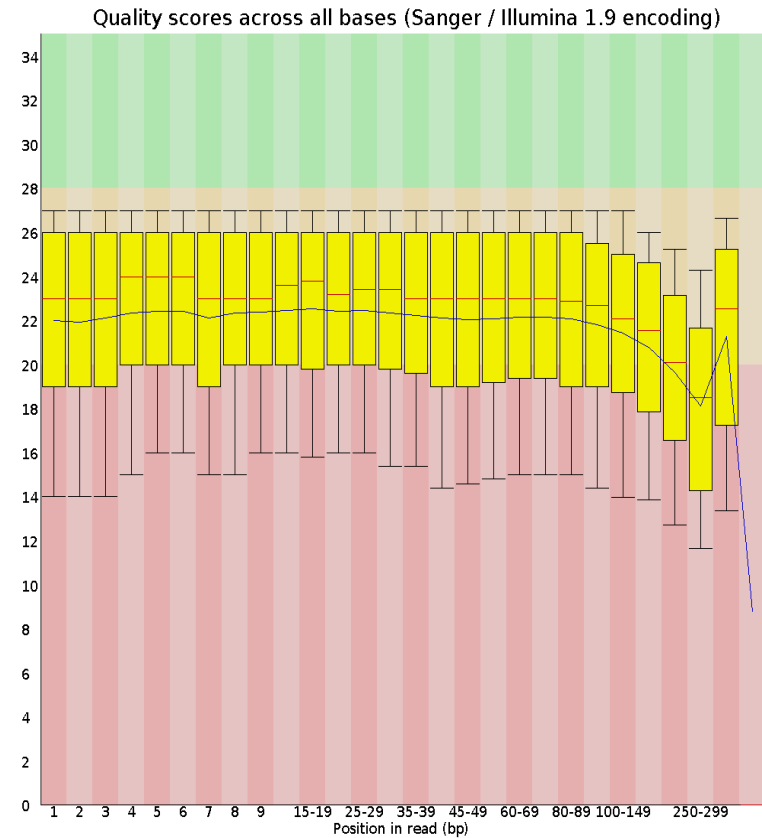

APEC infection 2 QualityScore\_BeforeFilter

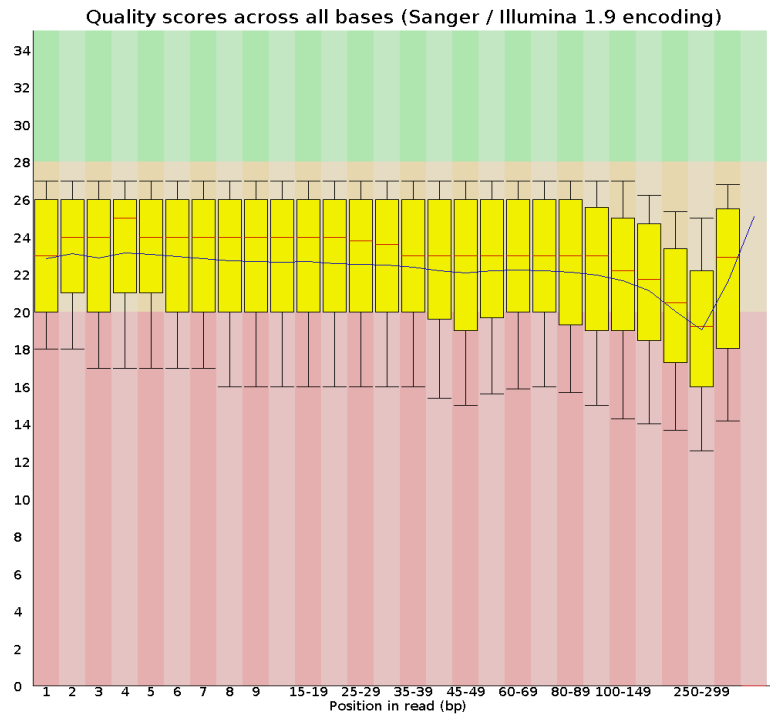

APEC infection 3 QualityScore\_AfterFilter

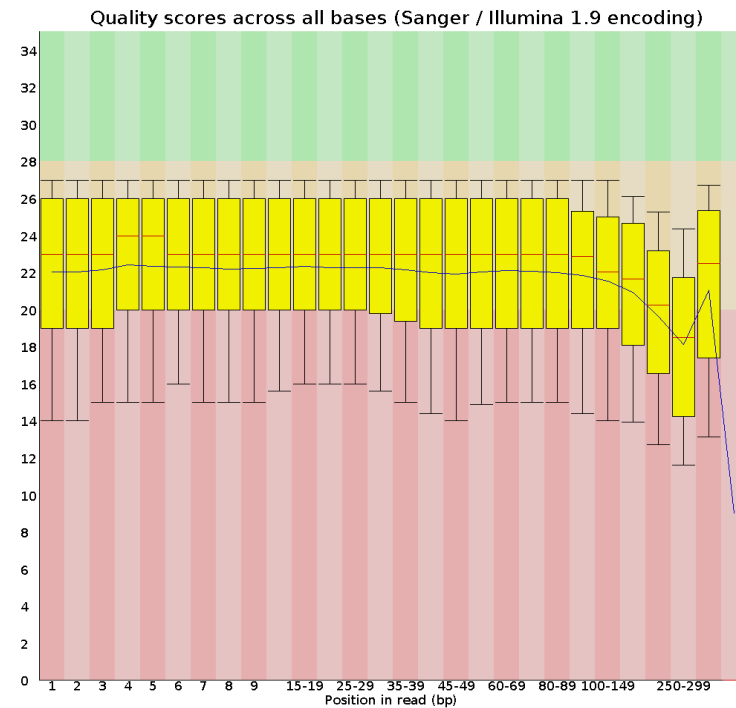

APEC infection 3 QualityScore\_BeforeFilter

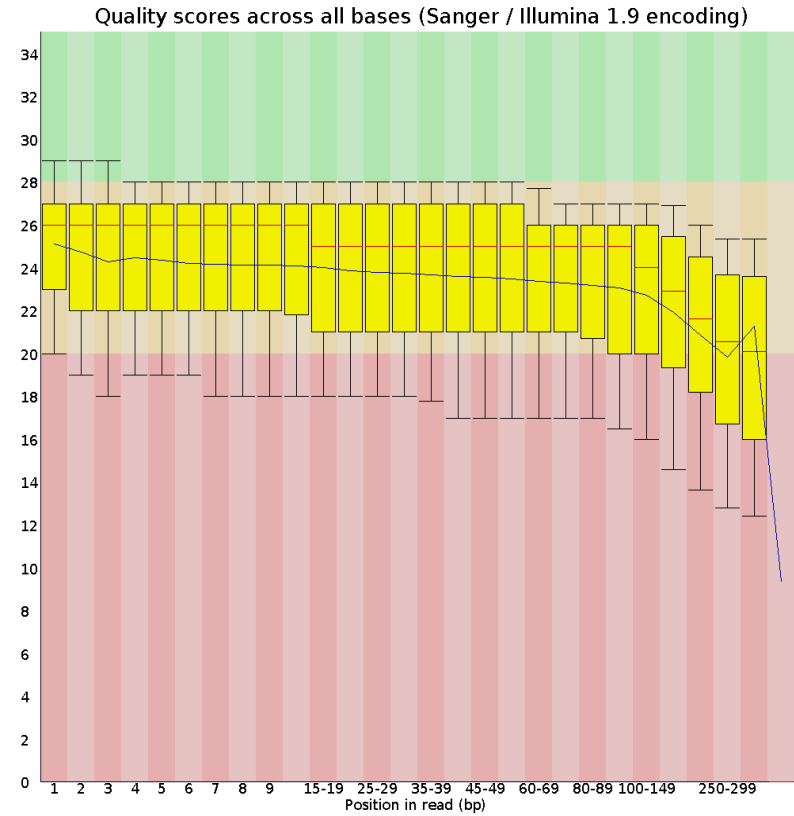

Control1 QualityScore\_AfterFilter

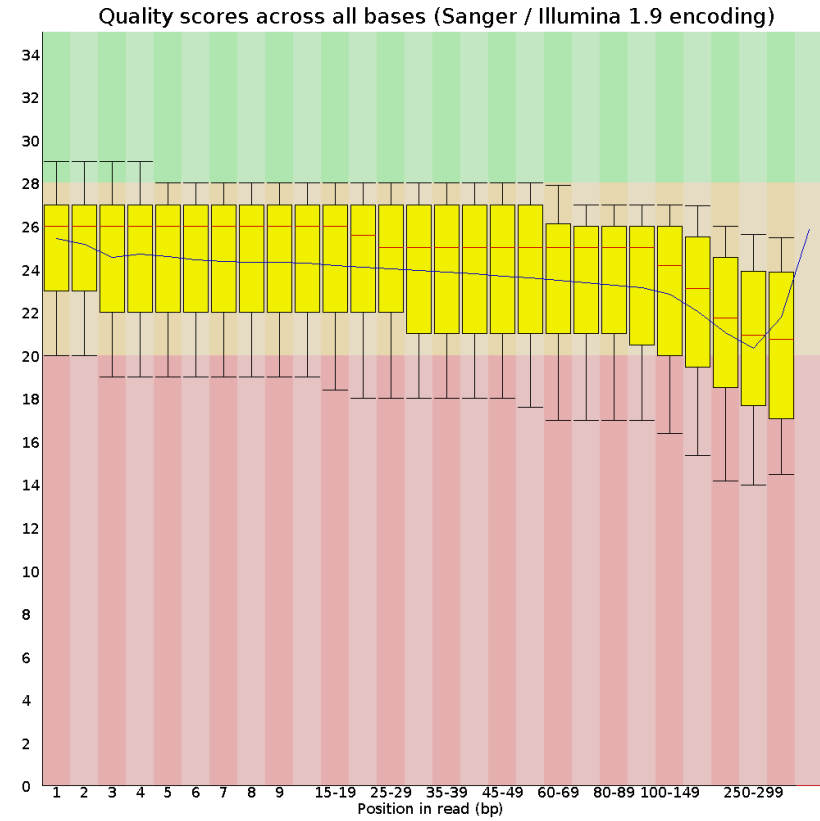

Control1 QualityScore\_BeforeFilter

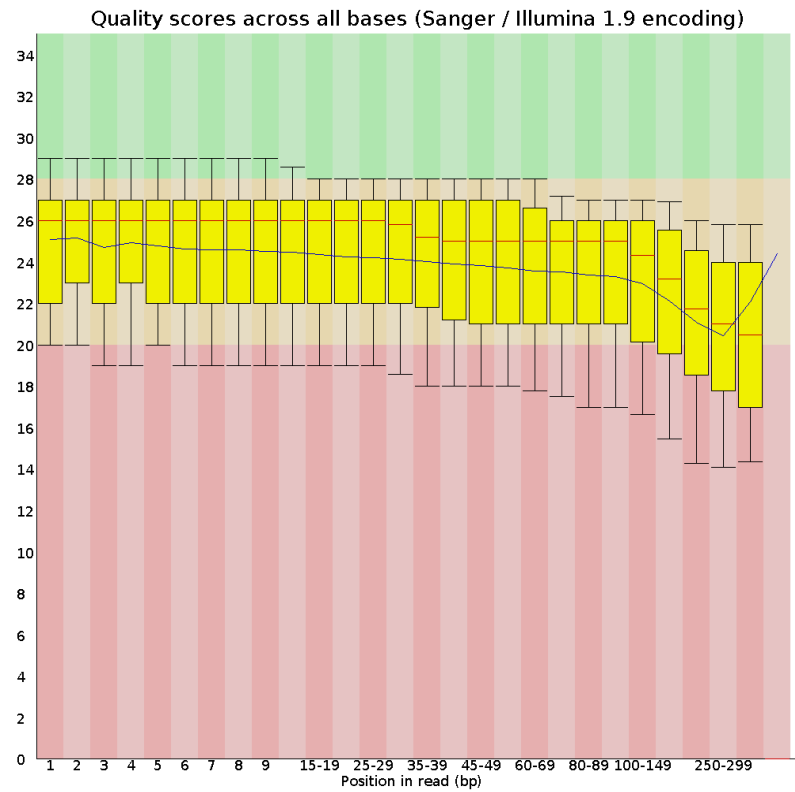

Control2 QualityScore\_AfterFilter

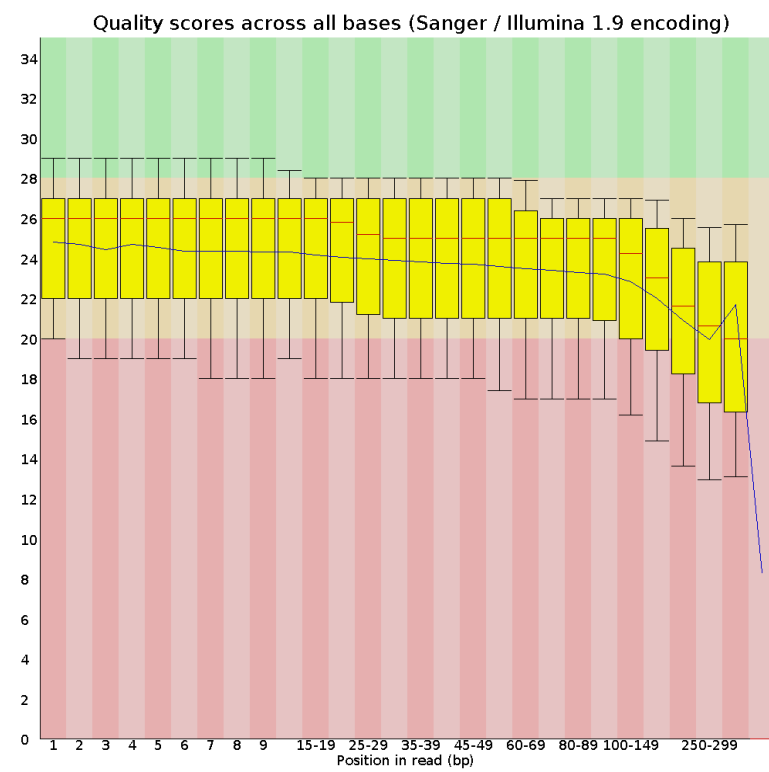

Control2 QualityScore\_BeforeFilter

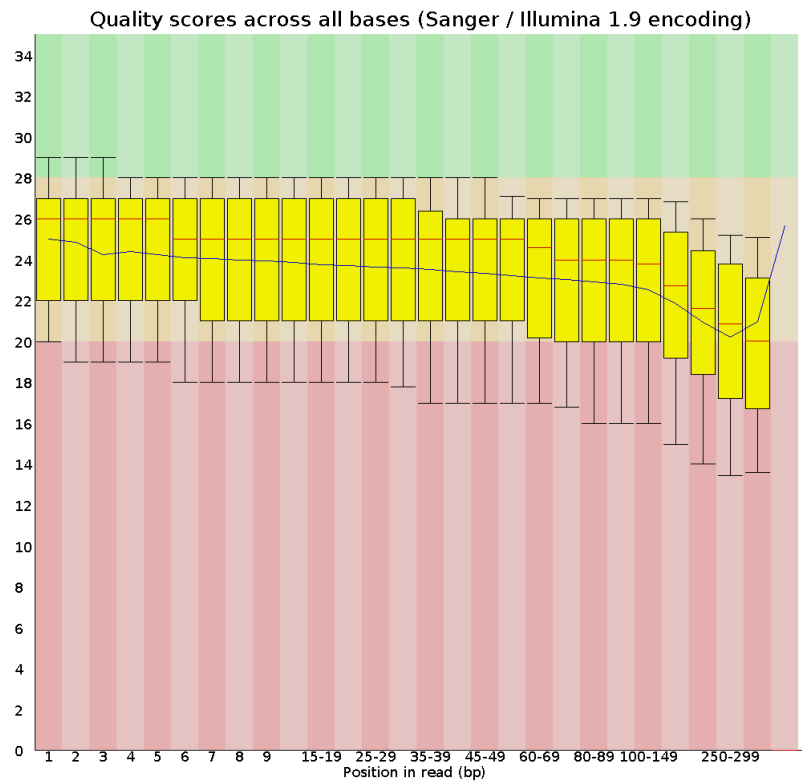

Control3 QualityScore\_AfterFilter

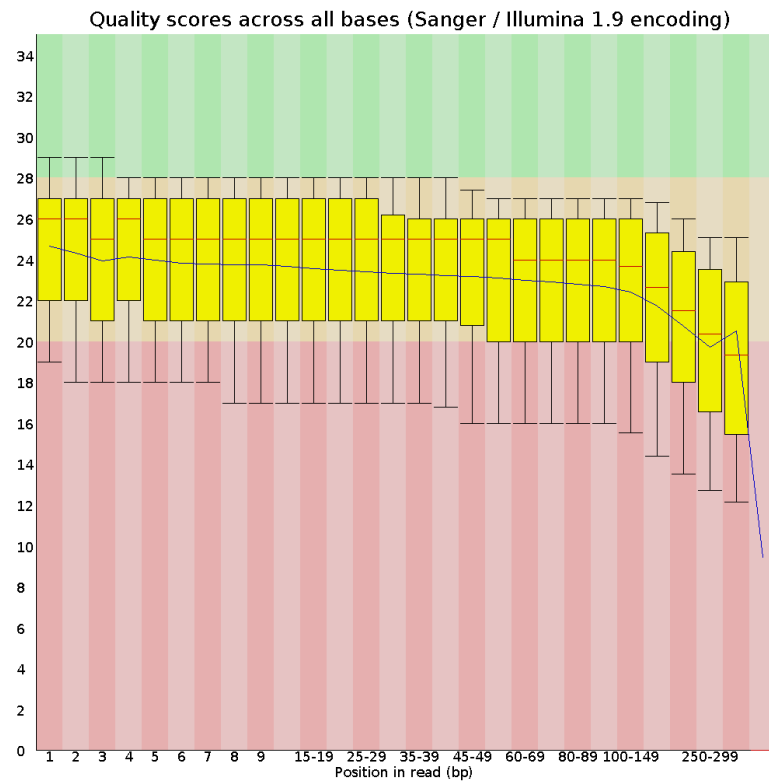

Control3 QualityScore\_BeforeFilter

# Sequence GC Content

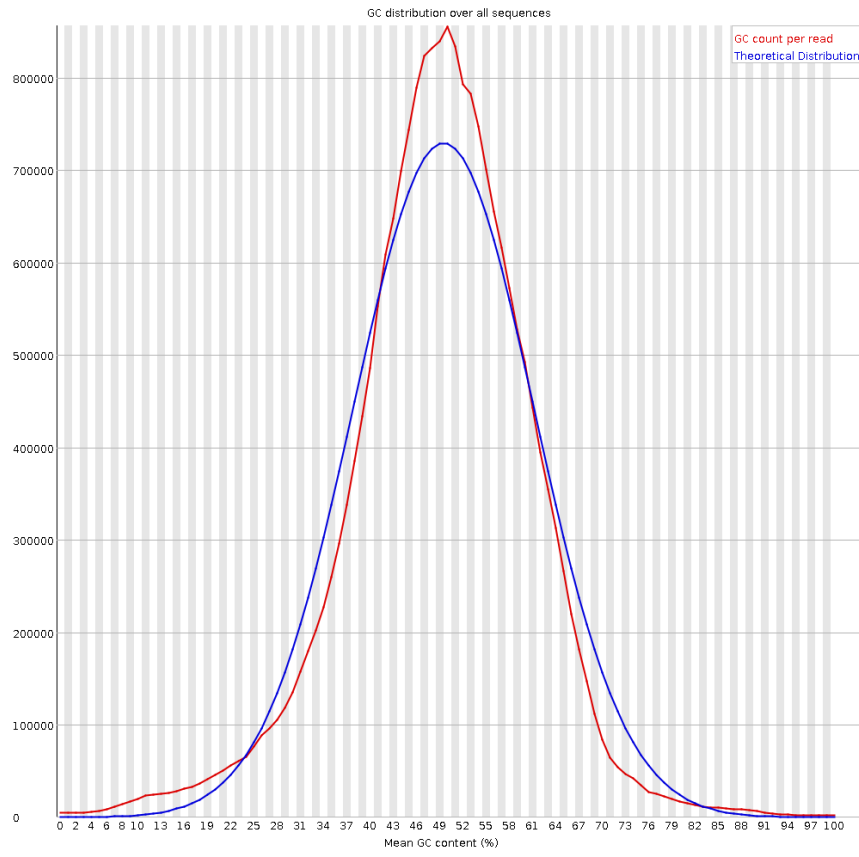

APEC infection1 Sequence GC Content\_AfterFilter

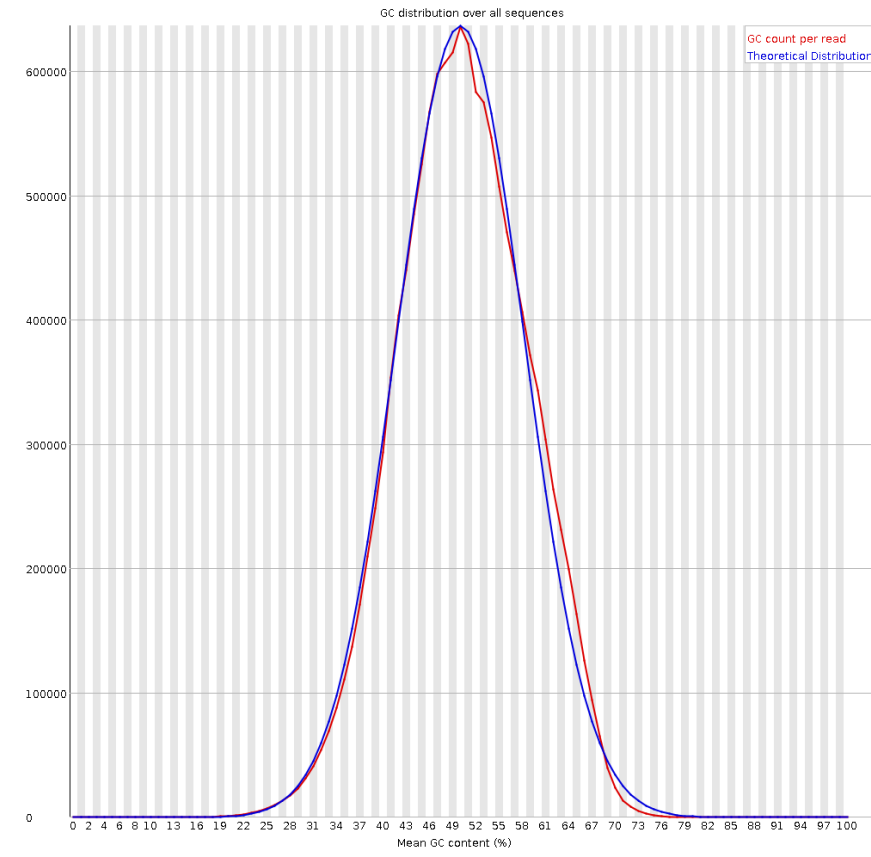

APEC infection 1 Sequence GC Content\_Before Filter

The horizontal axis represents the average GC content, The vertical axis represents reads. The blue line is the theoretical GC content distribution, the red line is the actual GC content distribution, the actual line distribution in the figure with the normal distribution Closely,it indicates that the results are better, can be used for the following analysis

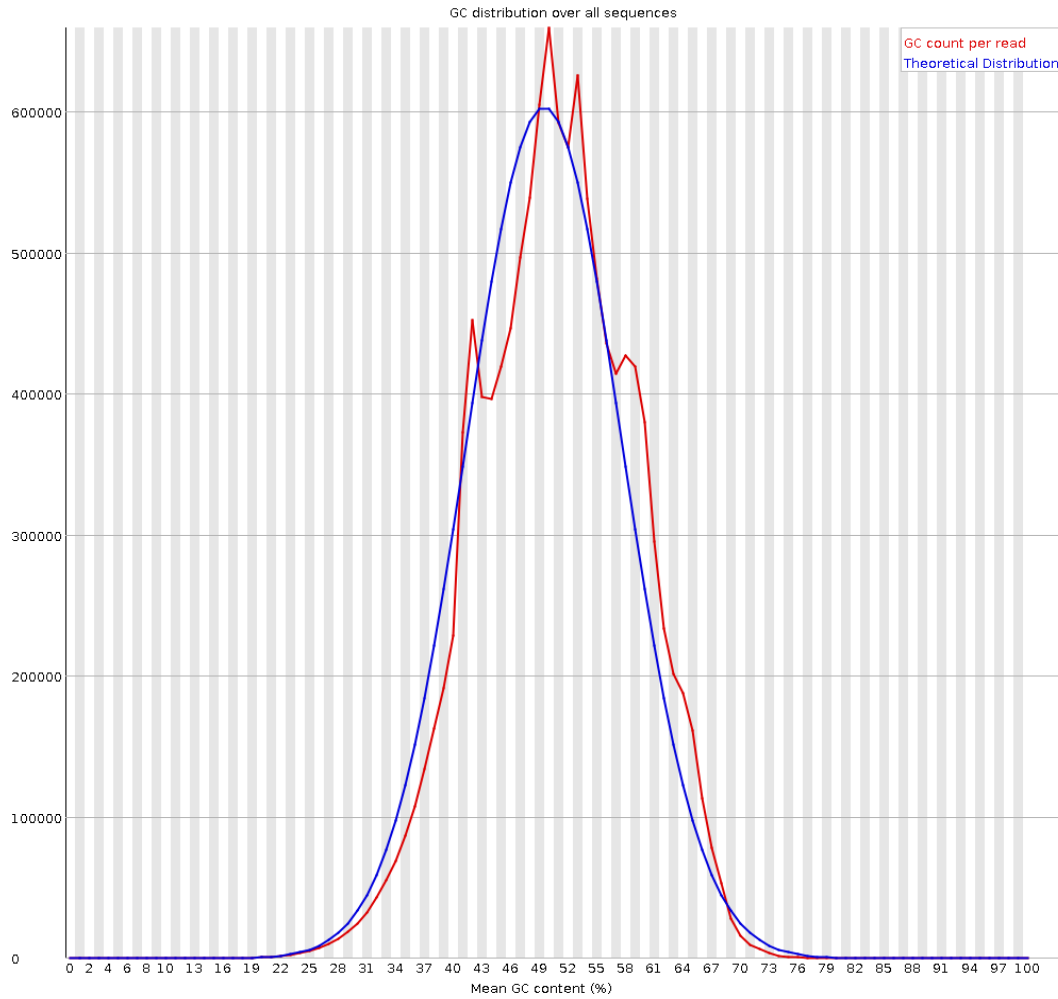

APEC infection2 Sequence GC Content\_AfterFilter

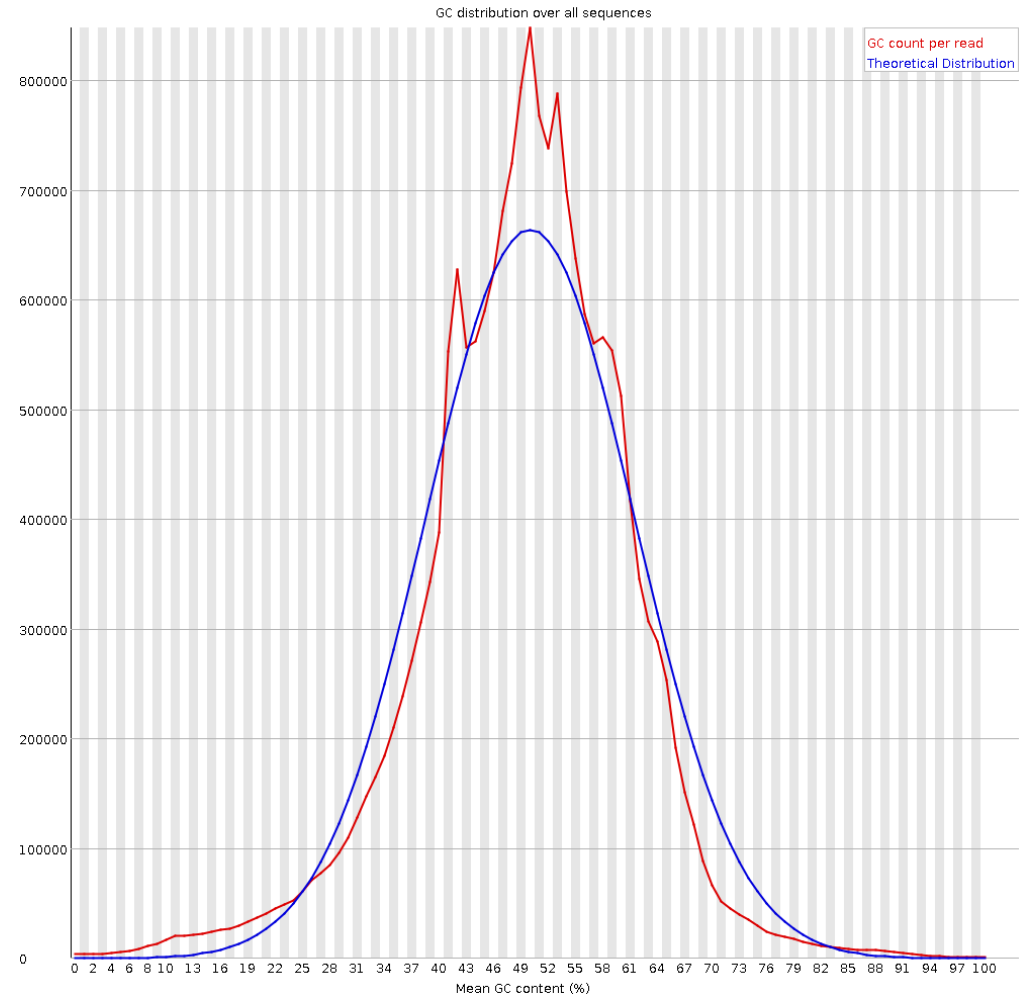

APEC infection 2 Sequence GC Content\_Before Filter



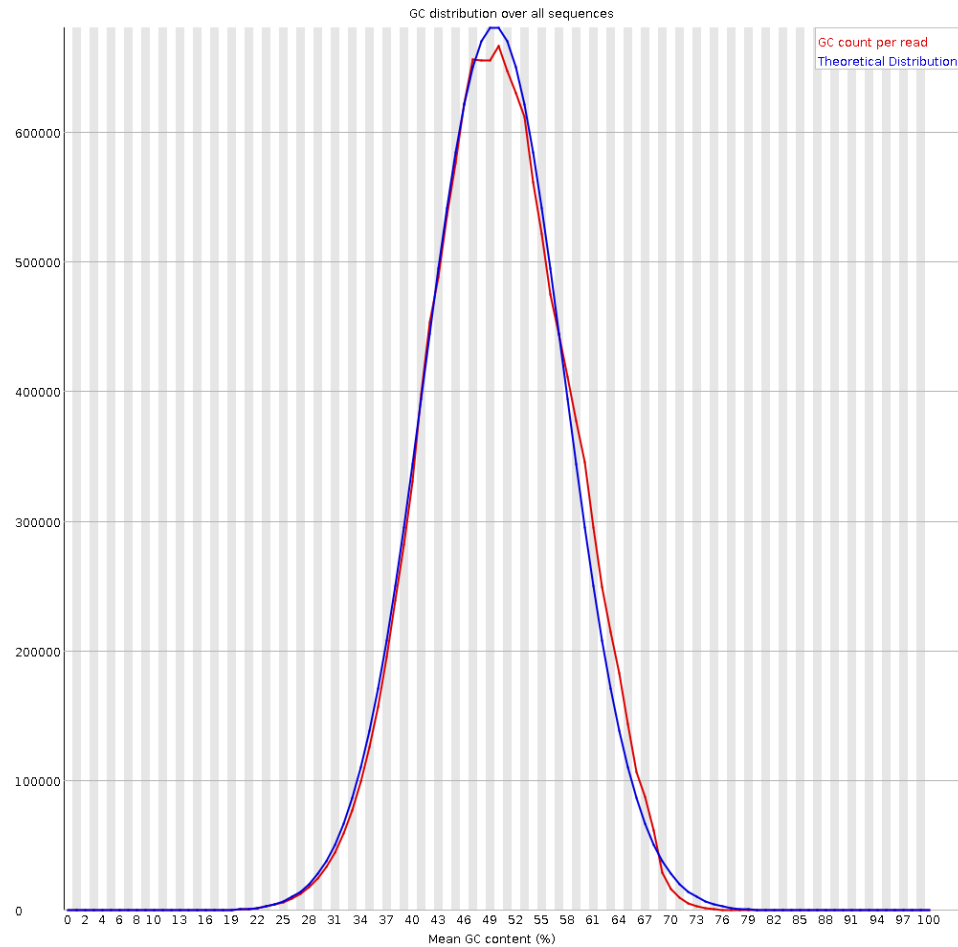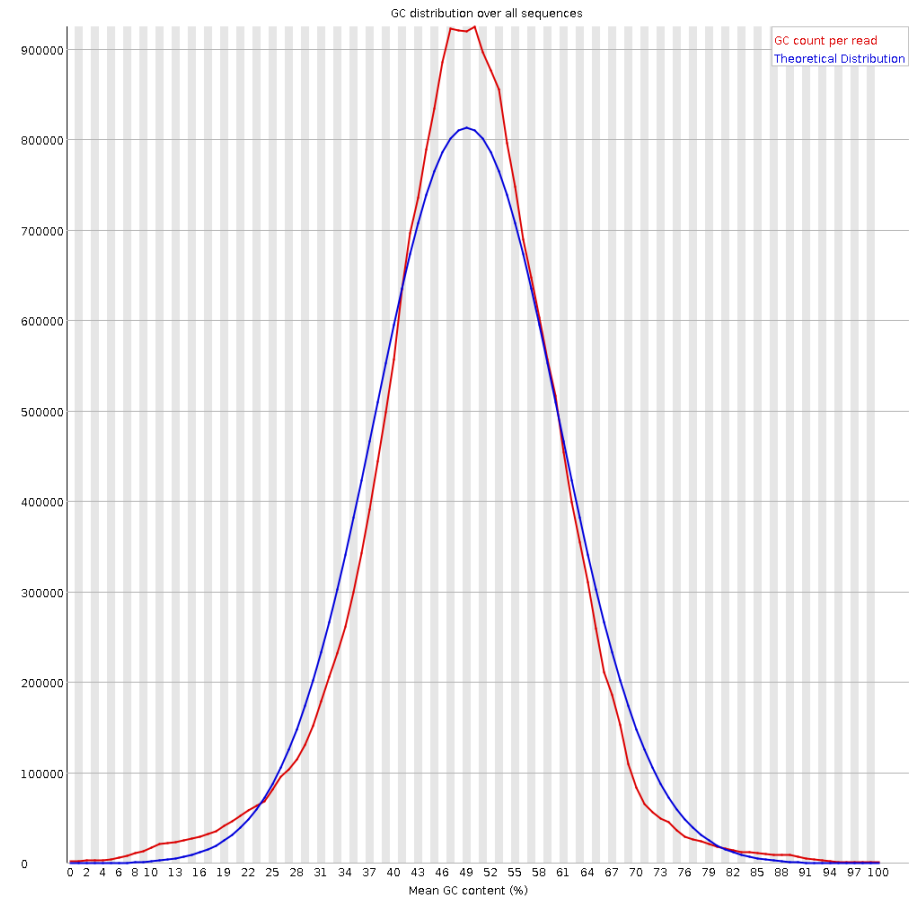

APEC infection3 Sequence GC Content\_AfterFilter    APEC infection 3 Sequence GC Content\_Before Filter

S3.Fig 2 The horizontal axis represents the average GC content, vertical The blue line is the theoretical GC content distribution, the red line is the actual GC content distribution, the actual line distribution in the figure with the normal distribution

Close, the results are better, can be used for the following analysis

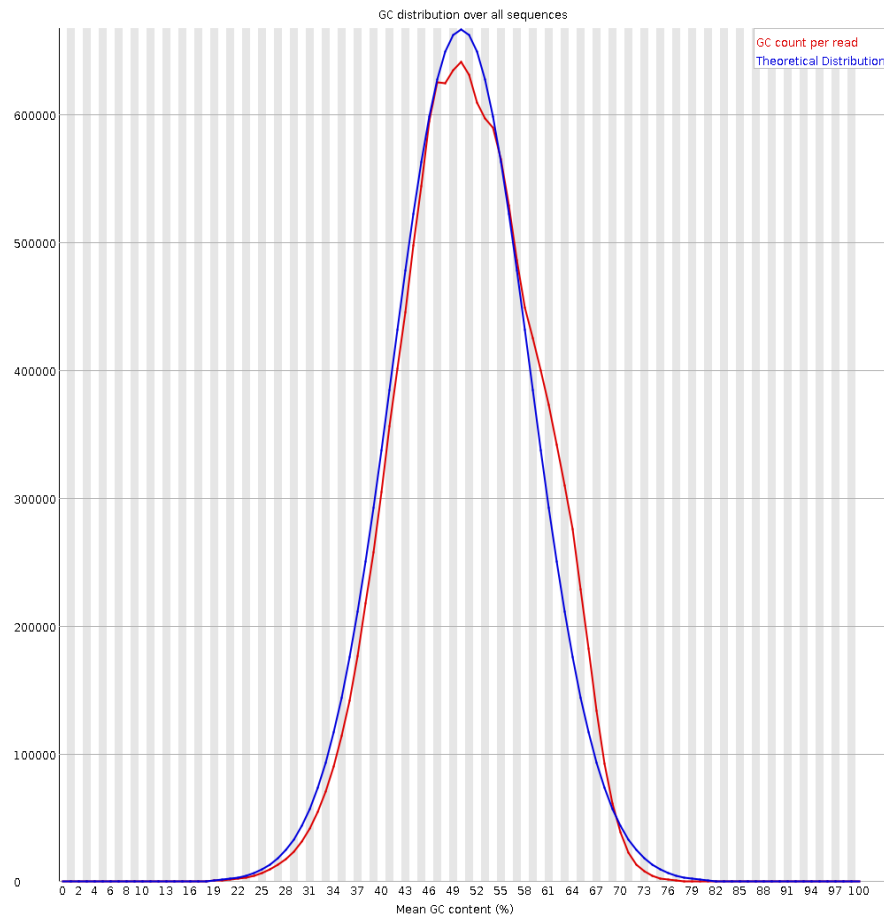

Control 1 Sequence GC Content\_AfterFilter

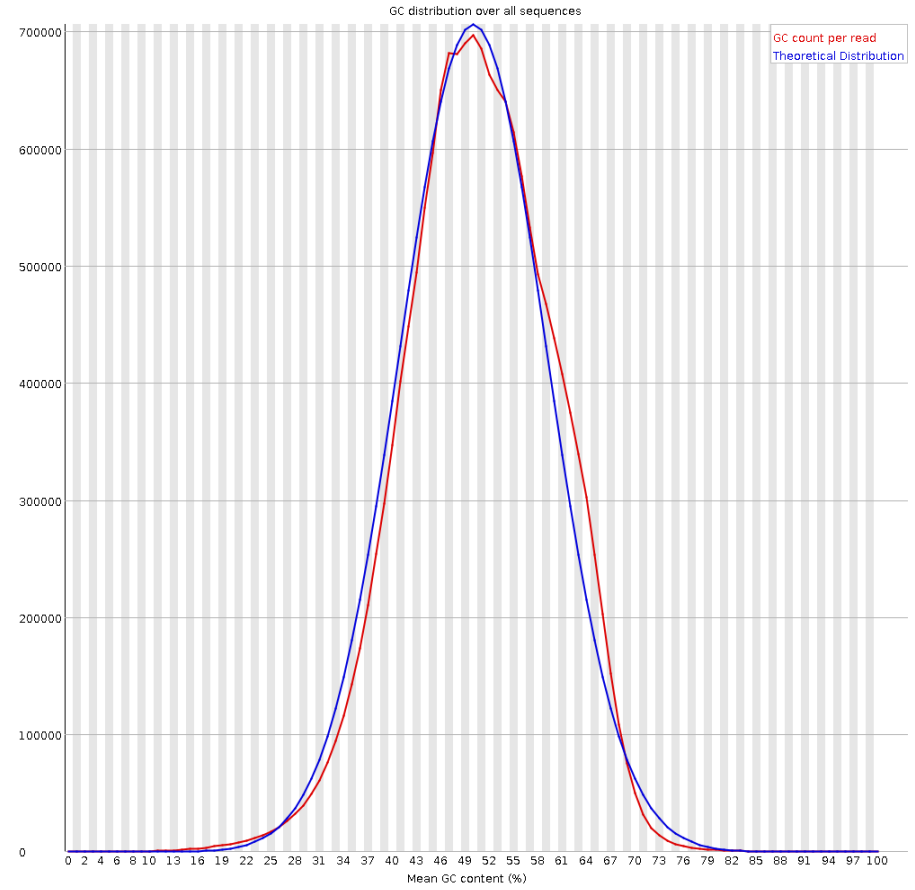

Control 1 Sequence GC Content\_Before Filter

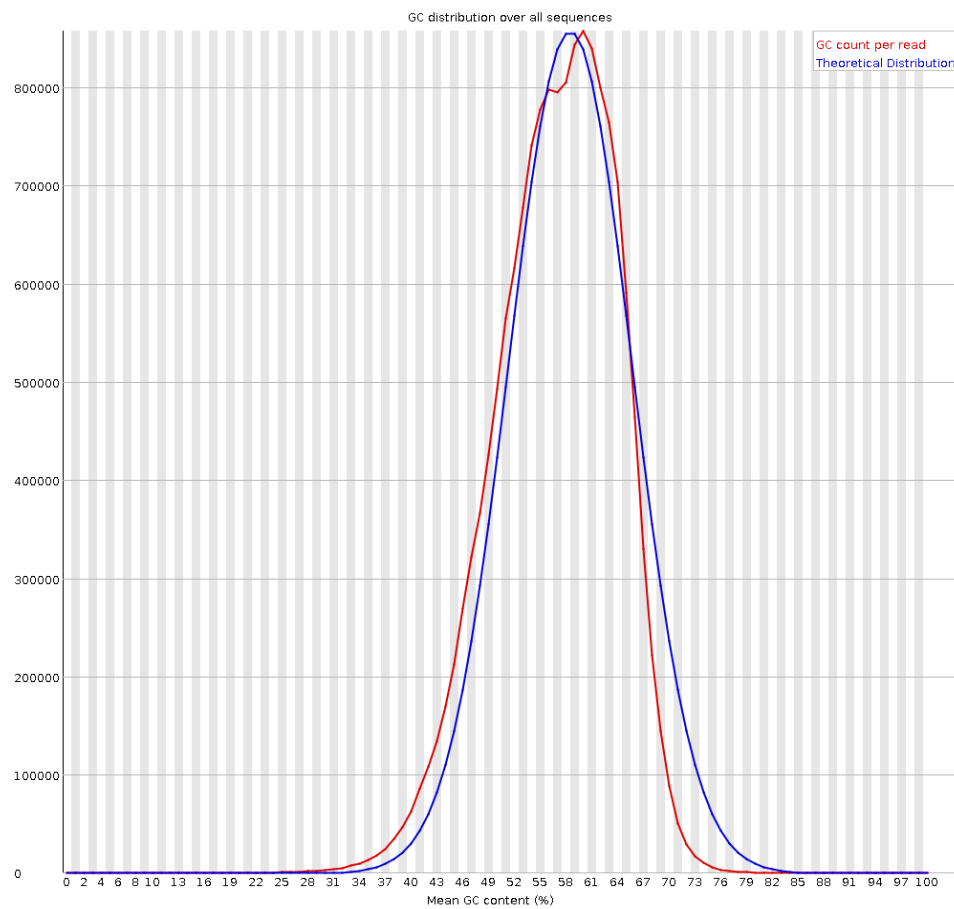

Control 2 Sequence GC Content\_AfterFilter

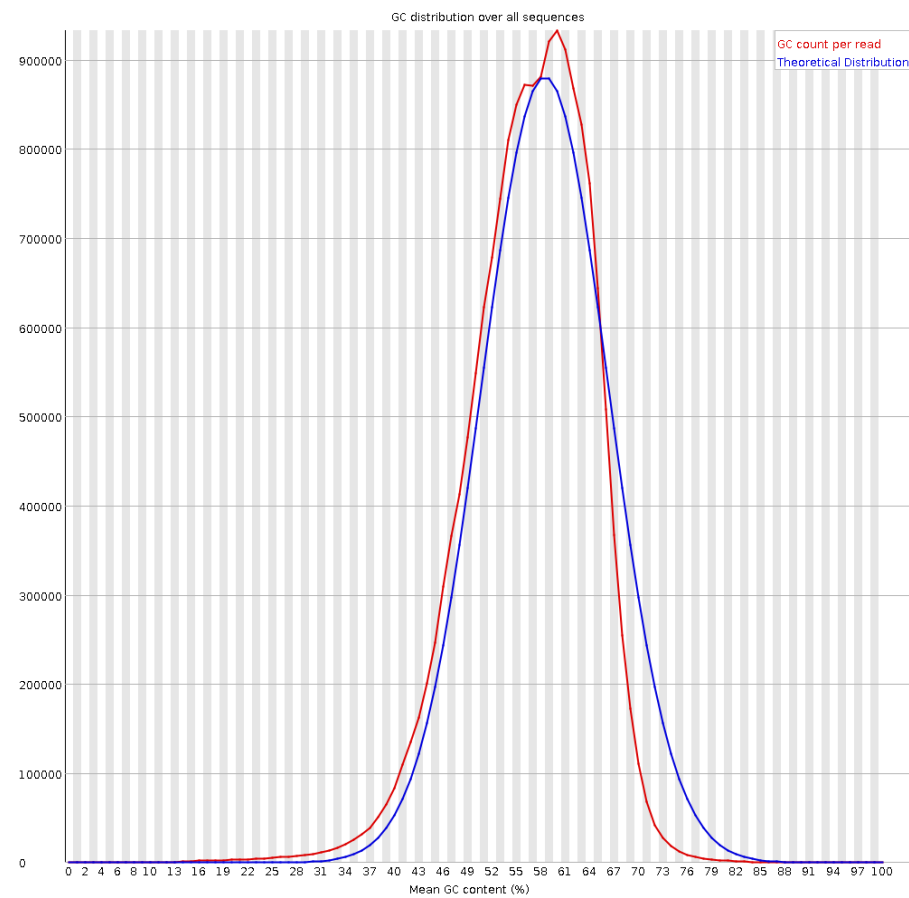

Control 2 Sequence GC Content\_Before Filter

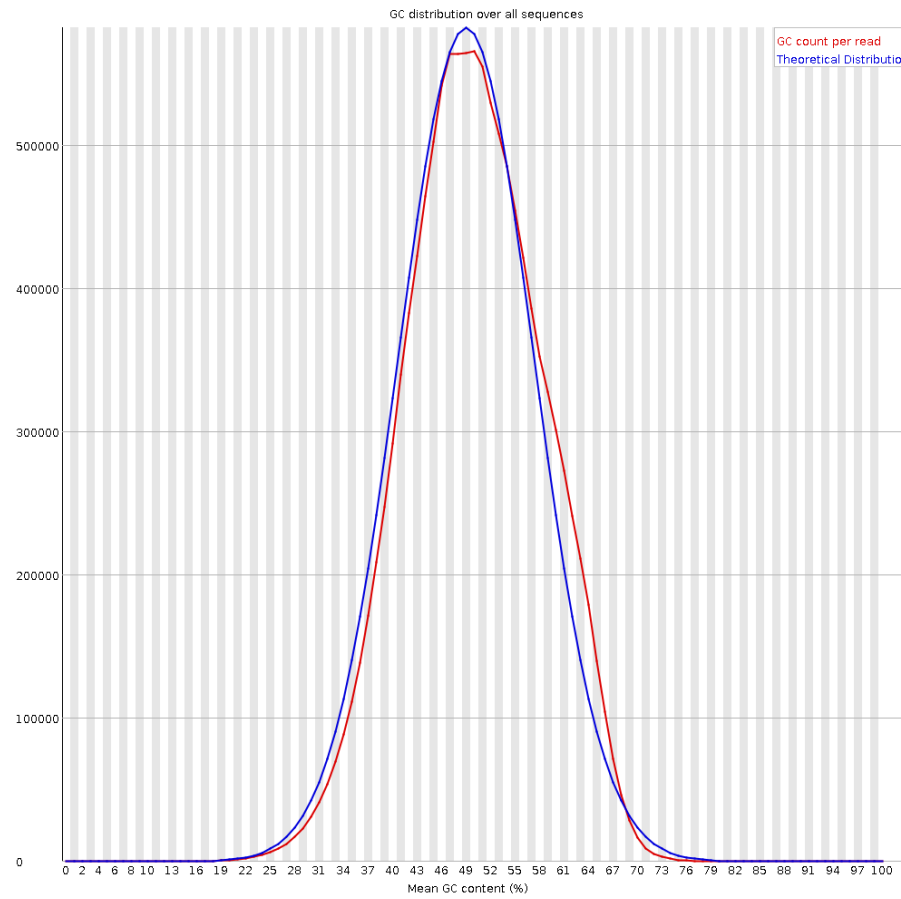

Control 3 Sequence GC Content\_AfterFilter

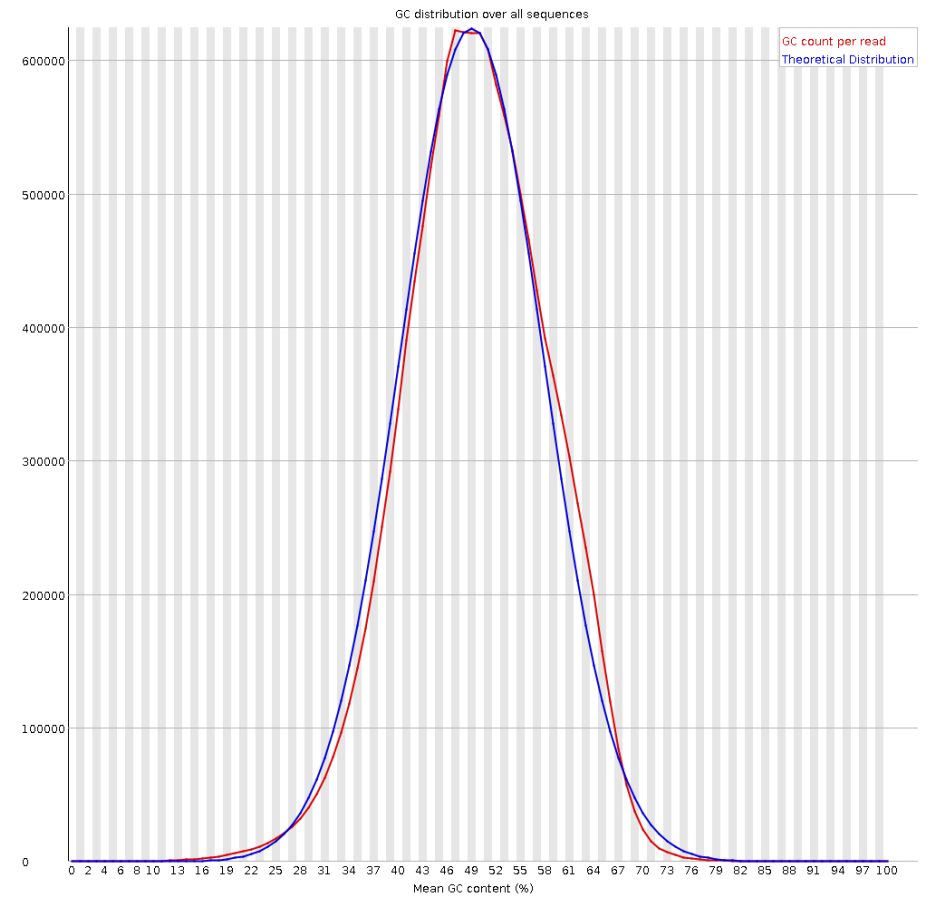

Control 3 Sequence GC Content\_Before Filter
