# Supplementary material for: RNA-seq profiles of chicken type II pneumocyte in response to Escherichia coli infection
Source: PubMed Central journal article supplement (PMC6550405; doi:10.1371/journal.pone.0217438), 2019-06-05

APEC infection

Control

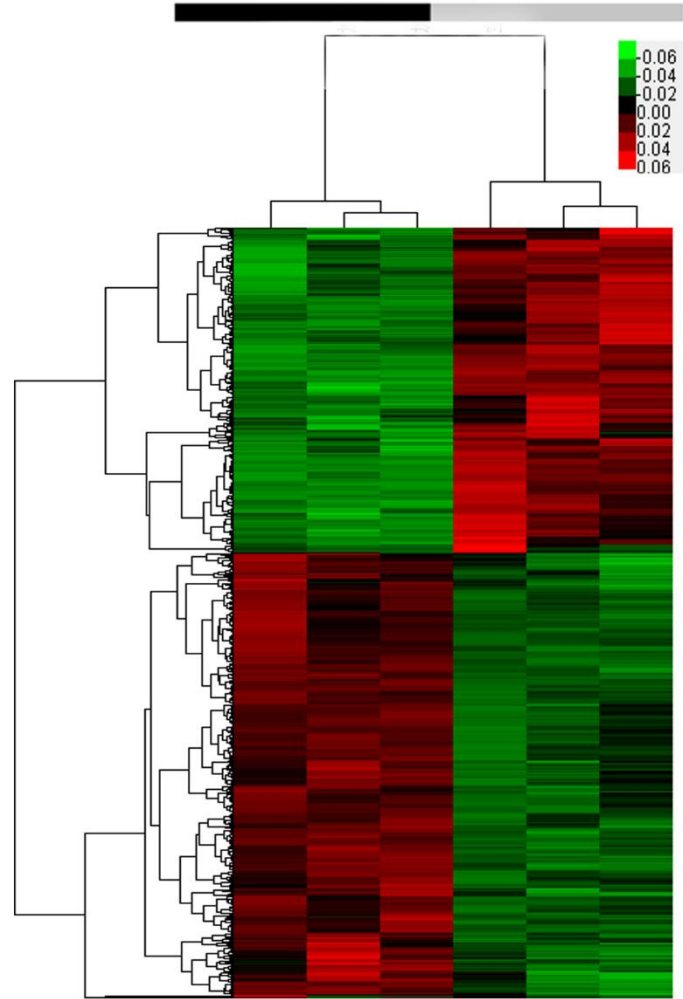

Supplement: pone.0217438.s003.pdf [file pone.0217438.s003.pdf]
