# Supplementary material for: RNA-seq profiles of chicken type II pneumocyte in response to Escherichia coli infection
Source: PubMed Central journal article supplement (PMC6550405; doi:10.1371/journal.pone.0217438), 2019-06-05
Supplement: pone.0217438.s005.pdf [file pone.0217438.s005.pdf]

**S1. Table** List of RT PCR primers used in this study

|    | Gene/Locus     | Forward primer                     | Reverse primer                       | References               |
|----|----------------|------------------------------------|--------------------------------------|--------------------------|
| 1  | CSF3           | F-AACCTCTCCTCCAACATCCAG            | R-GTACGCCGTCTCCAGGAAG                | Ama Szmolka et al.,2015  |
| 2  | IL8L2          | F-CAAGCCAAACACTCCTAACCAT           | R-AGCTCATCCCCATCTTTACC               | Ama Szmolka et al., 2015 |
| 3  | IL1 $\beta$    | F-GAAGTGCTTCGTGCTGGAGT             | R-ACTGGCATCTGCCAGTTC                 | Chranova et al., 2011    |
| 4  | IL8L1          | F-CCTCACTGCAAGAATGTGGA             | R-GGAGGAGGTAGGACGTTTTTG              | Ama Szmolka et al., 2015 |
| 5  | CCL17          | F-GCTCCTCAGCATCTTCCAGT             | R-CCTTGGTCCCGTCTTTGT                 | Ama Szmolka et al., 2015 |
| 6  | IL6            | F-GCTACAGCACAAAGCACCTG             | R-GACTTCAGATTGGCGAGGAG               | Berndt et al., 2007      |
| 7  | ACTB           | F-ATGTGGATCAGCAAGCAGGAGTA          | R-TTTATGCGCATTTATGGGTTTTGT           | GuoA et al., 2011        |
| 8  | HSPA2          | F-TCTCATCAAGCGTAACACCAC            | R-TCTCACCTTCATACACCTGGAC             | Soheil Varastehal., 2015 |
| 9  | MYCN           | F-ACCACTTTTCCATCGGTCAG             | R-TGGCACATCTTCACTCTCCA               | this study               |
| 10 | ATOH8          | F-AGCCCAACACATCATCTTC              | R-GCACATCTCACCTGGCACTA               | this study               |
| 11 | NLRP3          | F-TCATATCCCACCACCACCTT             | R-CACTGACACAGAAGGGCAGA               | this study               |
| 12 | BCL2           | F-GTAACAGCACACGCACATCC             | R- GCAAGTCCTCAGCCTTTGAC              | this study               |
| 13 | BAX            | F- ATTATGGGATGGCGTTATGG            | R- GCGGCTTCACTTCTTCTCC               | this study               |
| 14 | NFKBIZ         | F- GCCAGAAACTTGAAAATGAAC           | R- TGAAGTGTCTTCCCCTTAGGA             | Ama Szmolka et al.,2015  |
| 15 | NFKB1 $\alpha$ | F- TGAGGATGAGGAGAGCAGTG            | R- TCTTCTCCAATACAGCAGTCA             | Ama Szmolka et al.,2015  |
| 16 | TNFIP2         | F- TGACCAGATTGCTCCTGAAA            | R- TCGTACTTCTGCCATTTTGC              | this study               |
| 17 | HSP90          | ATGCCGGAAGCTGTGCAAAC<br>ACAGGACCAA | R-GGAATCAGGTTAATTTTCAG<br>GTCTTTTCCA | Soheil Varastehal., 2015 |
| 18 | TLR-4          | F-CTGACCTACCCATCGGACAC             | R-GCCTGAGAGAGGTCAGGTTG               | Soheil Varastehal., 2015 |
