# Supplementary material for: RNA-seq profiles of chicken type II pneumocyte in response to Escherichia coli infection
Source: PubMed Central journal article supplement (PMC6550405; doi:10.1371/journal.pone.0217438), 2019-06-05
Supplement: pone.0217438.s006.pdf [file pone.0217438.s006.pdf]

| #Item                | APEC infection | 1 |
|----------------------|----------------|---|
| <b>Statistics</b>    | <b>Result</b>  |   |
| All                  | 13563888       |   |
| UnMapped             | 1160813        |   |
| Mapped               | 12403075       |   |
| MappedRate           | 0.914          |   |
| UniqueMapped         | 11725249       |   |
| UniqueMappedRate     | 0.864          |   |
| RepeatMapped         | 677826         |   |
| JunctionAllMapped    | 4154534        |   |
| JunctionUniqueMapped | 4138986        |   |
| AllBase              | 2052318050     |   |
| UnMappedBase         | 138468360      |   |
| MappedBase           | 1913849690     |   |
| UniqueMappedBase     | 1815262115     |   |
| RepeatMappedBase     | 98587575       |   |

| #Item                | APEC infection | 2 |
|----------------------|----------------|---|
| <b>Statistics</b>    | <b>Result</b>  |   |
| All                  | 12557179       |   |
| UnMapped             | 1455958        |   |
| Mapped               | 11101221       |   |
| MappedRate           | 0.884          |   |
| UniqueMapped         | 9030741        |   |
| UniqueMappedRate     | 0.719          |   |
| RepeatMapped         | 2070480        |   |
| JunctionAllMapped    | 2716938        |   |
| JunctionUniqueMapped | 2705733        |   |
| AllBase              | 1868113503     |   |
| UnMappedBase         | 192572016      |   |
| MappedBase           | 1675541487     |   |
| UniqueMappedBase     | 1381122886     |   |
| RepeatMappedBase     | 294418601      |   |

| #Item                | APEC infection | 3 |
|----------------------|----------------|---|
| <b>Statistics</b>    | <b>Result</b>  |   |
| All                  | 14314412       |   |
| UnMapped             | 1223210        |   |
| Mapped               | 13091202       |   |
| MappedRate           | 0.915          |   |
| UniqueMapped         | 12232180       |   |
| UniqueMappedRate     | 0.855          |   |
| RepeatMapped         | 859022         |   |
| JunctionAllMapped    | 4350915        |   |
| JunctionUniqueMapped | 4333371        |   |
| AllBase              | 2181930019     |   |
| UnMappedBase         | 149452087      |   |
| MappedBase           | 2032477932     |   |
| UniqueMappedBase     | 1908905365     |   |
| RepeatMappedBase     | 123572567      |   |

#Mapping\_Statistics

| #Item                | control 1     |
|----------------------|---------------|
| <b>Statistics</b>    | <b>Result</b> |
| All                  | 13294410      |
| UnMapped             | 1540420       |
| Mapped               | 11753990      |
| MappedRate           | 0.884         |
| UniqueMapped         | 11394098      |
| UniqueMappedRate     | 0.857         |
| RepeatMapped         | 359892        |
| JunctionAllMapped    | 3957894       |
| JunctionUniqueMapped | 3948257       |
| AllBase              | 2201734135    |
| UnMappedBase         | 198665053     |
| MappedBase           | 2003069082    |
| UniqueMappedBase     | 1943811619    |
| RepeatMappedBase     | 59257463      |

#Mapping\_Statistics

#Item control 2

| <b>Statistics</b>    | <b>Result</b> |
|----------------------|---------------|
| All                  | 15609688      |
| UnMapped             | 1968074       |
| Mapped               | 13641614      |
| MappedRate           | 0.874         |
| UniqueMapped         | 13127738      |
| UniqueMappedRate     | 0.841         |
| RepeatMapped         | 513876        |
| JunctionAllMapped    | 5389519       |
| JunctionUniqueMapped | 5376311       |
| AllBase              | 2273043083    |
| UnMappedBase         | 238676032     |
| MappedBase           | 2034367051    |
| UniqueMappedBase     | 1961761548    |
| RepeatMappedBase     | 72605503      |

#Mapping\_Statistics

#Item control 3

| <b>Statistics</b>    | <b>Result</b> |
|----------------------|---------------|
| All                  | 14984846      |
| UnMapped             | 1589747       |
| Mapped               | 13395099      |
| MappedRate           | 0.894         |
| UniqueMapped         | 12961296      |
| UniqueMappedRate     | 0.865         |
| RepeatMapped         | 433803        |
| JunctionAllMapped    | 4815163       |
| JunctionUniqueMapped | 4792947       |
| AllBase              | 2304950402    |
| UnMappedBase         | 195280045     |
| MappedBase           | 2109670357    |
| UniqueMappedBase     | 2045128761    |
| RepeatMappedBase     | 64541596      |
