# Supplementary material for: RNA-seq profiles of chicken type II pneumocyte in response to Escherichia coli infection
Source: PubMed Central journal article supplement (PMC6550405; doi:10.1371/journal.pone.0217438), 2019-06-05
Supplement: pone.0217438.s008.pdf [file pone.0217438.s008.pdf]

S4. Table. Selected data from the RNA-seq of chicken type II pneumocyte, with a focus on transcripts representing Gallus gallus only.

Up- and down-regulated transcripts are listed in descending order of their expression fold change > 1.5, FDR ≤ 0.05.

| AccID        | APEC infection | Control     | Log2FC      | FDR | Style | Symbol       | Blast_Symbol |
|--------------|----------------|-------------|-------------|-----|-------|--------------|--------------|
| IL8L1        | 8845.43083     | 39.07138192 | 7.82267632  | 0   | up    | IL8L1        | CXCL8        |
| LOC107056355 | 4191.689772    | 63.25914553 | 6.050114067 | 0   | up    | LOC107056355 |              |
| IL8L2        | 6268.718468    | 96.78437973 | 6.017252503 | 0   | up    | IL8L2        | CXCL8        |
| PTGS2        | 7986.603271    | 281.3781556 | 4.826999814 | 0   | up    | PTGS2        | PTGS2        |
| HIST1H2B7L4  | 164.1059195    | 8.844069424 | 4.213773119 | 0   | up    | HIST1H2B7L4  | HIST2H2BE    |
| CSF3         | 156.706788     | 8.635322436 | 4.181673815 | 0   | up    | CSF3         | CSF3         |
| CD83         | 261.9558333    | 30.43461304 | 3.105538661 | 0   | up    | CD83         | CD83         |
| IL1B         | 284.8163207    | 34.03146761 | 3.065090545 | 0   | up    | IL1B         | IL1B         |
| IRG1         | 491.6608647    | 59.1287347  | 3.055732214 | 0   | up    | IRG1         | IRG1         |
| HIST1H111R   | 224.4576926    | 27.7523191  | 3.015763302 | 0   | up    | HIST1H111R   | HIST1H1D     |
| PLAU         | 958.4568589    | 129.0663666 | 2.892600398 | 0   | up    | PLAU         | PLAU         |
| LOC101750628 | 104.3140132    | 14.36165559 | 2.860639003 | 0   | up    | LOC101750628 |              |
| ATF3         | 3587.66925     | 585.3501156 | 2.615675186 | 0   | up    | ATF3         |              |
| TNIP2        | 344.1113485    | 58.1283495  | 2.565561621 | 0   | up    | TNIP2        | TNIP2        |
| PFKFB3       | 1848.715453    | 356.3279432 | 2.375245659 | 0   | up    | PFKFB3       |              |
| CHAC1        | 1663.015607    | 332.8252115 | 2.320965081 | 0   | up    | CHAC1        | CHAC1        |
| NDRG1        | 9646.523374    | 2200.053519 | 2.132470466 | 0   | up    | NDRG1        | xp_005250810 |
| LOC107054477 | 143.6941025    | 33.20828095 | 2.113385904 | 0   | up    | LOC107054477 |              |
| INPP5F       | 940.042039     | 221.3812475 | 2.086192255 | 0   | up    | INPP5F       | INPP5F       |
| TGFBR3       | 664.9691053    | 156.94291   | 2.083047459 | 0   | up    | TGFBR3       | TGFBR3       |
| RRAD         | 677.0483267    | 167.4469225 | 2.015554954 | 0   | up    | RRAD         | RRAD         |
| SLC16A6      | 562.804805     | 145.0762664 | 1.955823124 | 0   | up    | SLC16A6      | xp_005277841 |
| LPP          | 1341.889608    | 370.6527568 | 1.856125845 | 0   | up    | LPP          | LPP          |
| PLIN2        | 7206.802293    | 2024.011611 | 1.832141702 | 0   | up    | PLIN2        | PLIN2        |
| BIRC2        | 2615.024406    | 788.3227426 | 1.72996611  | 0   | up    | BIRC2        | BIRC2        |
| UNC119       | 961.9160978    | 291.1281528 | 1.724256703 | 0   | up    | UNC119       | UNC119       |
| LOC107054109 | 144.0716612    | 43.85115296 | 1.716099906 | 0   | up    | LOC107054109 |              |
| ETS2         | 2658.279264    | 836.7072461 | 1.66769784  | 0   | up    | ETS2         | ETS2         |
| ZC3H12A      | 2173.96457     | 688.6732073 | 1.658436973 | 0   | up    | ZC3H12A      | ZC3H12A      |
| ENO2         | 776.0418658    | 250.8467899 | 1.629328009 | 0   | up    | ENO2         | xp_005277807 |
| LOC419429    | 141.9074301    | 45.92025901 | 1.627747445 | 0   | up    | LOC419429    | PTPN11       |
| CCSER1       | 424.3254669    | 138.012097  | 1.620376541 | 0   | up    | CCSER1       | CCSER1       |
| LOC101751641 | 1369.237863    | 448.6274669 | 1.609783236 | 0   | up    | LOC101751641 |              |
| GABRA4       | 395.2322067    | 129.5287247 | 1.609428445 | 0   | up    | GABRA4       | GABRA4       |
| SLC25A29     | 620.7000118    | 203.5920078 | 1.608215245 | 0   | up    | SLC25A29     | SLC25A29     |
| TRIM24       | 354.1795817    | 116.2897356 | 1.606757282 | 0   | up    | TRIM24       |              |
| ZFYVE28      | 250.2041459    | 83.4712865  | 1.583753784 | 0   | up    | ZFYVE28      | ZFYVE28      |
| PPM1K        | 533.313242     | 178.9270605 | 1.575611557 | 0   | up    | PPM1K        | PPM1K        |
| SLC25A37     | 584.9838682    | 200.518313  | 1.544662839 | 0   | up    | SLC25A37     | SLC25A37     |
| DENND5A      | 1518.518084    | 523.1406658 | 1.537393264 | 0   | up    | DENND5A      |              |
| GFOD1        | 2128.856894    | 763.377944  | 1.479609563 | 0   | up    | GFOD1        | GFOD1        |
| SLC43A2      | 589.4255551    | 211.6148251 | 1.477868909 | 0   | up    | SLC43A2      | SLC43A2      |
| LOC378902    | 393.633368     | 142.1097165 | 1.469847322 | 0   | up    | LOC378902    | TNFRSF10A    |
| BACH2        | 513.3738462    | 190.5008504 | 1.430212362 | 0   | up    | BACH2        | BACH2        |
| USP49        | 361.2220083    | 135.9663138 | 1.409636533 | 0   | up    | USP49        | xp_005249048 |
| ABHD2        | 3888.137231    | 1485.02592  | 1.388591027 | 0   | up    | ABHD2        | ABHD2        |
| IFRD1        | 5167.021979    | 1983.087034 | 1.381585024 | 0   | up    | IFRD1        | IFRD1        |
| LARP4B       | 1518.372558    | 596.0958628 | 1.348909558 | 0   | up    | LARP4B       |              |
| PLSCR5       | 224.4493907    | 88.55460119 | 1.341751005 | 0   | up    | PLSCR5       | PLSCR5       |

|              |             |             |              |   |      |              |              |
|--------------|-------------|-------------|--------------|---|------|--------------|--------------|
| AREG         | 2703.151919 | 1075.314599 | 1.329883792  | 0 | up   | AREGB        | xp_001125684 |
| PDXP         | 336.5566229 | 134.0679246 | 1.327885129  | 0 | up   | PDXP         |              |
| DUSP1        | 3243.277179 | 1299.035582 | 1.320011377  | 0 | up   | DUSP1        | DUSP1        |
| HECW2        | 748.6239484 | 302.2844488 | 1.30833444   | 0 | up   | HECW2        |              |
| CHMP4C       | 1071.717963 | 448.8505432 | 1.255618246  | 0 | up   | CHMP4C       | CHMP4C       |
| RC3H1        | 1207.323697 | 545.1564081 | 1.14707042   | 0 | up   | RC3H1        |              |
| CRIM1        | 1516.499941 | 693.3857932 | 1.129015259  | 0 | up   | CRIM1        | CRIM1        |
| GABARAPL1    | 2475.994061 | 1137.512942 | 1.122124894  | 0 | up   | GABARAPL1    | GABARAPL1    |
| FAM110B      | 324.5762139 | 150.2204589 | 1.111475967  | 0 | up   | FAM110B      | FAM110B      |
| USP40        | 235.2451538 | 109.5890973 | 1.102060727  | 0 | up   | USP40        | USP40        |
| TIPARP       | 2541.796196 | 1197.31566  | 1.086044804  | 0 | up   | TIPARP       | TIPARP       |
| MXI1         | 719.4234335 | 341.4346945 | 1.075231489  | 0 | up   | MXI1         | MXI1         |
| JMY          | 573.4988082 | 278.97308   | 1.039664575  | 0 | up   | JMY          | JMY          |
| TMPRSS2      | 244.8578658 | 120.6765105 | 1.020799657  | 0 | up   | TMPRSS2      | TMPRSS2      |
| MITF         | 807.8592509 | 401.980516  | 1.006978386  | 0 | up   | MITF         | MITF         |
| AP000295.9   | 650.069698  | 330.6839555 | 0.975141358  | 0 | up   | AP000295.9   |              |
| RASSF3       | 2703.063114 | 1399.128853 | 0.950066364  | 0 | up   | RASSF3       | RASSF3       |
| FAM13A       | 3485.834142 | 1805.241968 | 0.949311703  | 0 | up   | FAM13A       |              |
| IPP          | 455.9157291 | 237.5652321 | 0.940443471  | 0 | up   | IPP          | IPP          |
| MYNN         | 527.8347247 | 275.7964724 | 0.93648226   | 0 | up   | MYNN         | MYNN         |
| TMEM38A      | 411.9285334 | 216.2856262 | 0.929456271  | 0 | up   | TMEM38A      | TMEM38A      |
| MAP1LC3B     | 2506.569357 | 1328.743505 | 0.915651514  | 0 | up   | MAP1LC3B     | MAP1LC3B     |
| OXSRI        | 939.4723466 | 504.4574025 | 0.897118246  | 0 | up   | OXSRI        | OXSRI        |
| NMD3         | 598.2678562 | 331.1783918 | 0.853183007  | 0 | up   | NMD3         | NMD3         |
| PKP2         | 976.9178845 | 553.9680761 | 0.818434461  | 0 | up   | PKP2         | PKP2         |
| ADCK3        | 2226.094088 | 1273.098239 | 0.806170822  | 0 | up   | ADCK3        | xp_005273263 |
| GJA1         | 1850.075601 | 1066.120907 | 0.795213165  | 0 | up   | GJA1         | GJA1         |
| C26H6ORF89   | 775.539252  | 449.8272073 | 0.785828878  | 0 | up   | C26H6ORF89   | C6orf89      |
| PDCD61P      | 5509.392147 | 3249.93676  | 0.761481509  | 0 | up   | PDCD61P      | PDCD61P      |
| TMF1         | 1837.21946  | 1114.16583  | 0.721559993  | 0 | up   | TMF1         | xp_005264827 |
| IRF6         | 3134.21291  | 1915.794763 | 0.710160172  | 0 | up   | IRF6         | xp_005273175 |
| SLC37A3      | 1723.941836 | 1066.732703 | 0.692512383  | 0 | up   | SLC37A3      | xp_005250115 |
| SRPRB        | 1885.333212 | 1181.023811 | 0.674781475  | 0 | up   | SRPRB        | xp_005247741 |
| BAG3         | 3160.678599 | 1988.655331 | 0.668441085  | 0 | up   | BAG3         |              |
| NAV2         | 772.0189257 | 491.8857898 | 0.650312837  | 0 | up   | NAV2         | NAV2         |
| TMEM131      | 2430.196526 | 1559.252824 | 0.640218115  | 0 | up   | TMEM131      | TMEM131      |
| TOP1         | 2678.022303 | 1719.08965  | 0.639523193  | 0 | up   | TOP1         | TOP1         |
| EIF5B        | 3617.296111 | 2332.294698 | 0.633161609  | 0 | up   | EIF5B        | EIF5B        |
| MAP2K1       | 1749.241632 | 1146.706255 | 0.609233717  | 0 | up   | MAP2K1       | MAP2K1       |
| ARFGAP2      | 530.0418369 | 848.5546181 | -0.678901285 | 0 | down | ARFGAP2      | ARFGAP2      |
| SIK2         | 398.0432673 | 643.5598628 | -0.693149091 | 0 | down | SIK1         | SIK2         |
| ACSBG2       | 448.2030508 | 731.5064469 | -0.70671811  | 0 | down | ACSBG2       | xp_005259707 |
| LOC101750205 | 1039.70052  | 1705.997055 | -0.714447129 | 0 | down | LOC101750205 |              |
| LOC770305    | 269.0588818 | 452.4510502 | -0.749839786 | 0 | down | LOC770305    |              |
| TFIP11       | 292.1223983 | 521.8894184 | -0.837171171 | 0 | down | TFIP11       | xp_005261535 |
| CSTF1        | 171.4040896 | 307.375276  | -0.842599593 | 0 | down | CSTF1        | CSTF1        |
| SART3        | 429.6920428 | 773.7868712 | -0.84863319  | 0 | down | SART3        | SART3        |
| DNAJA1       | 736.819991  | 1330.131223 | -0.852184471 | 0 | down | DNAJA1       | xp_005251502 |
| ASB1         | 190.3074303 | 358.4082732 | -0.913272048 | 0 | down | ASB1         | ASB1         |
| RANBP3       | 551.4761586 | 1054.819083 | -0.935625156 | 0 | down | RANBP3       | RANBP3       |
| PPP2R5D      | 736.1267942 | 1416.699431 | -0.944507517 | 0 | down | PPP2R5D      |              |
| RIPK4        | 1022.5984   | 2043.991758 | -0.999149704 | 0 | down | RIPK4        | RIPK4        |
| TNFRSF11A    | 150.3854228 | 312.277057  | -1.054161848 | 0 | down | TNFRSF11A    | TNFRSF11A    |
| DROSHA       | 154.0491184 | 333.8122502 | -1.115646473 | 0 | down | DROSHA       | DROSHA       |

|              |             |             |              |          |      |              |              |
|--------------|-------------|-------------|--------------|----------|------|--------------|--------------|
| FBXL18       | 85.48232636 | 195.8812443 | -1.19628119  | 0        | down | FBXL18       | FBXL18       |
| HSPA8        | 14483.30516 | 33244.20654 | -1.198712074 | 0        | down | HSPA8        | xp_005271592 |
| MB21D1       | 80.3720327  | 185.4151048 | -1.205993302 | 0        | down | MB21D1       | MB21D1       |
| LOC101749275 | 130.436692  | 302.9143249 | -1.215560047 | 0        | down | LOC101749275 | SPATA2       |
| FLRT3        | 344.3358316 | 805.0008086 | -1.225173917 | 0        | down | FLRT3        |              |
| OGFR         | 128.6084218 | 304.4556057 | -1.243246757 | 0        | down | OGFR         | xp_005260244 |
| LOC101747869 | 68.5621053  | 175.0101014 | -1.35195488  | 0        | down | LOC101747869 | MYPOP        |
| MYOM3        | 452.3387192 | 1155.286838 | -1.352775695 | 0        | down | MYOM3        |              |
| BLM          | 69.60138881 | 188.8813844 | -1.440292523 | 0        | down | BLM          | BLM          |
| F13A1        | 163.3867146 | 450.265339  | -1.462484745 | 0        | down | F13A1        | F13A1        |
| MCM10        | 52.57360139 | 146.9556679 | -1.482970532 | 0        | down | MCM10        |              |
| C2CD3        | 54.94069805 | 159.6503255 | -1.538968349 | 0        | down | C2CD3        | xp_005273951 |
| MYCN         | 106.1015591 | 322.3317729 | -1.603100549 | 0        | down | MYCN         | MYCN         |
| CDCP2        | 216.0744527 | 659.9174024 | -1.610756956 | 0        | down | CDCP2        | CDCP2        |
| PGM2L1       | 43.52701478 | 134.9868246 | -1.632835616 | 0        | down | PGM2L1       | PGM2L1       |
| IL22RA1      | 252.875541  | 806.8663041 | -1.673902141 | 0        | down | IL22RA1      | IL22RA1      |
| CLSPN        | 45.84346335 | 153.0050246 | -1.738791086 | 0        | down | CLSPN        | CLSPN        |
| LOC100857913 | 30.03154765 | 114.2684633 | -1.927876562 | 0        | down | LOC100857913 | NWD1         |
| LOC107057277 | 36.67354165 | 139.9508448 | -1.932108693 | 0        | down | LOC107057277 |              |
| ZBTB7C       | 42.77874089 | 255.2642817 | -2.577025755 | 0        | down | ZBTB7C       | xp_005258288 |
| VDHAP        | 14.36835939 | 115.6142406 | -3.008351865 | 0        | down | VDHAP        |              |
| LOC107054036 | 23.83834098 | 196.2047429 | -3.041004176 | 0        | down | LOC107054036 |              |
| ANKRD29      | 111.5654505 | 35.15530919 | 1.666075836  | 1.11E-16 | up   | ANKRD29      | ANKRD29      |
| NR4A3        | 324.7228866 | 112.8151755 | 1.525247923  | 1.11E-16 | up   | NR4A3        | NR4A3        |
| SMURF1       | 1715.818101 | 675.3968418 | 1.345089278  | 1.11E-16 | up   | SMURF1       | SMURF1       |
| HSP25        | 1797.327483 | 362.6323955 | 2.309273582  | 2.22E-16 | up   | HSP25        | CRYAB        |
| CREBRF       | 255.2814553 | 111.1343739 | 1.199783626  | 2.22E-16 | up   | CREBRF       | CREBRF       |
| LONRF3       | 362.4697292 | 169.9313975 | 1.092908079  | 2.22E-16 | up   | LONRF3       | LONRF3       |
| SRSF5        | 297.1197405 | 984.6135707 | -1.728513164 | 2.22E-16 | down | SRSF5        | SRSF5        |
| AFAP1        | 1024.176834 | 625.1878979 | 0.712103075  | 3.33E-16 | up   | AFAP1        | xp_005248049 |
| POLR3E       | 1099.69094  | 639.4808352 | 0.782125093  | 4.44E-16 | up   | POLR3E       |              |
| PBX3         | 94.77571974 | 196.9958513 | -1.055575835 | 4.44E-16 | down | PBX3         | PBX3         |
| KSR1         | 984.3570343 | 540.2871804 | 0.865455237  | 7.77E-16 | up   | KSR1         | KSR1         |
| CLK1         | 662.4664565 | 245.9035301 | 1.429754961  | 9.99E-16 | up   | CLK1         | CLK1         |
| CXORF23      | 627.5054688 | 262.8779444 | 1.255234928  | 9.99E-16 | up   | CXORF23      |              |
| ARRDC3       | 395.0463931 | 142.9169066 | 1.466845497  | 1.11E-15 | up   | ARRDC3       | ARRDC3       |
| KIAA0195     | 406.5094181 | 738.4816185 | -0.861273234 | 1.11E-15 | down | KIAA0195     | KIAA0195     |
| VSIG4        | 35.79319408 | 95.94697806 | -1.422552077 | 1.11E-15 | down | VSIG4        | VSIG4        |
| B3GNT4       | 51.83569954 | 148.6060412 | -1.519474829 | 1.11E-15 | down | B3GNT4       | B3GNT4       |
| LONP2        | 635.8012746 | 334.3565137 | 0.927188686  | 1.22E-15 | up   | LONP2        | LONP2        |
| CBX7         | 76.86977998 | 13.95782958 | 2.461341917  | 1.33E-15 | up   | CBX7         |              |
| UBE2H        | 1681.924942 | 786.3189854 | 1.096926732  | 1.33E-15 | up   | UBE2H        | UBE2H        |
| TOPORS       | 145.8706122 | 311.406389  | -1.094109283 | 1.67E-15 | down | TOPORS       | TOPORS       |
| WBP4         | 900.2742307 | 384.469821  | 1.227494167  | 2.33E-15 | up   | WBP4         | WBP4         |
| LOC424892    | 193.15176   | 77.37417702 | 1.319810759  | 2.89E-15 | up   | LOC424892    | BDH1         |
| NOTUM        | 544.3779758 | 869.9626608 | -0.676344781 | 2.89E-15 | down | NOTUM        |              |
| LOC107052553 | 89.88507047 | 256.5258584 | -1.512950845 | 2.89E-15 | down | LOC107052553 |              |
| CZH18ORF25   | 567.2777407 | 310.3706892 | 0.870062937  | 3.33E-15 | up   | CZH18ORF25   | C18orf25     |
| RASD1        | 278.3086341 | 95.79750954 | 1.538625611  | 3.55E-15 | up   | RASD1        | RASD1        |
| DIS3L        | 698.803714  | 272.5989427 | 1.35810731   | 3.66E-15 | up   | DIS3L        | DIS3L        |
| ILDR2        | 159.1461118 | 426.3048814 | -1.421533665 | 3.66E-15 | down | ILDR2        | ILDR2        |
| TSEN54       | 134.5316361 | 404.4151162 | -1.58789145  | 3.66E-15 | down | TSEN54       | LLGL2        |
| TLE1         | 120.5806748 | 262.4469313 | -1.122027021 | 3.77E-15 | down | TLE1         | TLE1         |
| LOC418249    | 402.6043471 | 103.352314  | 1.961792059  | 5.11E-15 | up   | LOC418249    |              |

|              |             |             |              |          |      |              |              |
|--------------|-------------|-------------|--------------|----------|------|--------------|--------------|
| RYK          | 1164.786143 | 415.4277753 | 1.487395515  | 5.11E-15 | up   | RYK          | RYK          |
| DHX40        | 514.4637663 | 326.4452158 | 0.656228573  | 5.11E-15 | up   | DHX40        | DHX40        |
| ZMAT3        | 438.83015   | 196.5035573 | 1.15910722   | 1.30E-14 | up   | ZMAT3        | ZMAT3        |
| SLC1A4       | 2262.295403 | 886.2911085 | 1.351934779  | 1.50E-14 | up   | SLC1A4       | SLC1A4       |
| FAM126B      | 249.5904642 | 91.07081513 | 1.454502114  | 1.53E-14 | up   | FAM126B      | FAM126B      |
| TRPS1        | 534.1764953 | 219.3543972 | 1.284052869  | 1.84E-14 | up   | TRPS1        | xp_005251103 |
| KLHL26       | 50.50934474 | 152.4624242 | -1.593831489 | 1.90E-14 | down | KLHL26       |              |
| HEG1         | 102.5522849 | 235.7635366 | -1.200980971 | 1.97E-14 | down | HEG1         | HEG1         |
| NCOA5        | 264.8344844 | 739.1709261 | -1.480817023 | 2.13E-14 | down | NCOA5        | NCOA5        |
| LOC107055032 | 704.9683269 | 1063.955473 | -0.593807428 | 2.48E-14 | down | LOC107055032 |              |
| LOC107054120 | 63.41007723 | 161.0544819 | -1.344764771 | 2.78E-14 | down | LOC107054120 |              |
| RNF165       | 938.9439229 | 291.8999938 | 1.685564817  | 3.20E-14 | up   | RNF165       | RNF165       |
| KIAA1191     | 700.3054238 | 432.1209124 | 0.69654921   | 4.29E-14 | up   | KIAA1191     | KIAA1191     |
| SSX2IP       | 108.5297856 | 35.73876052 | 1.602529534  | 4.52E-14 | up   | SSX2IP       | SSX2IP       |
| JADE3        | 528.4893097 | 1343.627392 | -1.346186919 | 4.61E-14 | down | JADE3        |              |
| PPARG        | 776.0120676 | 114.077982  | 2.766058722  | 5.26E-14 | up   | PPARG        | PPARG        |
| EAF2         | 324.3222635 | 99.86215139 | 1.69941817   | 5.55E-14 | up   | EAF2         | EAF2         |
| KBTBD4       | 179.5570668 | 494.6662745 | -1.462013108 | 6.48E-14 | down | KBTBD4       | KBTBD4       |
| ORA12        | 607.1125873 | 398.9705616 | 0.605681785  | 7.05E-14 | up   | ORA12        | ORA12        |
| CRB2         | 2303.4585   | 4320.563343 | -0.907417827 | 9.38E-14 | down | CRB2         | CRB2         |
| MCTP2        | 216.8456236 | 77.51315498 | 1.484155246  | 9.84E-14 | up   | MCTP2        |              |
| INHBA        | 2326.486246 | 852.5532891 | 1.44829074   | 1.04E-13 | up   | INHBA        | INHBA        |
| LOC107054666 | 31.32010636 | 90.39240112 | -1.529112385 | 1.68E-13 | down | LOC107054666 |              |
| RGS1         | 121.0202483 | 6.786624788 | 4.156410386  | 1.76E-13 | up   | RGS1         | RGS1         |
| E4F1         | 133.542564  | 303.5572755 | -1.184669107 | 2.18E-13 | down | E4F1         |              |
| ODC1         | 2638.887968 | 1019.487307 | 1.37208629   | 3.03E-13 | up   | ODC1         | xp_005246222 |
| CGRRF1       | 326.4123492 | 92.21708012 | 1.823589749  | 3.05E-13 | up   | CGRRF1       | CGRRF1       |
| MYO1F        | 16.19720292 | 73.57030642 | -2.183378903 | 3.26E-13 | down | MYO1F        | MYO1F        |
| RNF126       | 1848.449509 | 980.8298872 | 0.914240791  | 3.35E-13 | up   | RNF126       | RNF126       |
| ERCC6L       | 66.92796208 | 168.6525641 | -1.333373262 | 4.10E-13 | down | ERCC6L       | ERCC6L       |
| LOC107051736 | 30.33438766 | 114.7958136 | -1.920043936 | 4.53E-13 | down | LOC107051736 |              |
| AATF         | 275.4019626 | 469.8928363 | -0.770792933 | 4.70E-13 | down | AATF         | AATF         |
| LOC107054808 | 87.6194066  | 300.250649  | -1.776845015 | 5.39E-13 | down | LOC107054808 |              |
| LOC107052041 | 66.10934458 | 17.68737516 | 1.902134246  | 5.97E-13 | up   | LOC107052041 |              |
| SDC4         | 2833.099104 | 1674.736611 | 0.758446851  | 6.16E-13 | up   | SDC4         | SDC4         |
| BCL2         | 130.5100889 | 47.71574848 | 1.451623929  | 8.00E-13 | up   | BCL2         | BCL2         |
| LOC420486    | 143.2931831 | 41.75292525 | 1.779020795  | 8.28E-13 | up   | LOC420486    | FASN         |
| MBNL2        | 926.06071   | 471.1525636 | 0.974912482  | 8.89E-13 | up   | MBNL2        | MBNL2        |
| RASGRP1      | 993.5124897 | 332.6089586 | 1.578711077  | 9.73E-13 | up   | RASGRP1      | RASGRP1      |
| LOC420294    | 144.7920628 | 377.7382841 | -1.383404491 | 1.05E-12 | down | LOC420294    | CYLD         |
| TMEM104      | 192.53692   | 454.8101979 | -1.240129486 | 1.11E-12 | down | TMEM104      | xp_005257536 |
| L3MBTL1      | 243.6794939 | 757.863446  | -1.636953072 | 1.31E-12 | down | L3MBTL1      | xp_005260445 |
| TGFB2        | 640.5905296 | 307.2127717 | 1.060164275  | 1.57E-12 | up   | TGFB2        | TGFB2        |
| CREB5        | 393.5268348 | 164.4988983 | 1.258384095  | 1.59E-12 | up   | CREB5        | CREB5        |
| LOC107055306 | 173.420915  | 55.58544484 | 1.641498837  | 1.60E-12 | up   | LOC107055306 |              |
| TICAM1       | 189.9360052 | 362.8806649 | -0.933981773 | 1.70E-12 | down | TICAM1       | TICAM1       |
| CSNK1D       | 2176.102155 | 1135.028128 | 0.939018234  | 1.79E-12 | up   | CSNK1D       | CSNK1D       |
| CPNE8        | 406.0361196 | 80.91692401 | 2.327094687  | 1.81E-12 | up   | CPNE8        | CPNE8        |
| SLC22A23     | 323.2552443 | 141.0176311 | 1.196798225  | 2.27E-12 | up   | SLC22A23     | SLC22A23     |
| RIPK3        | 243.783703  | 94.9573418  | 1.36025023   | 2.68E-12 | up   | RIPK3        |              |
| KIAA1551     | 874.6146612 | 304.2122727 | 1.523569176  | 3.42E-12 | up   | KIAA1551     |              |
| DHRX         | 969.4749849 | 585.7777239 | 0.726850342  | 4.28E-12 | up   | DHRX         |              |
| CHST12       | 185.8769621 | 342.3894102 | -0.88129011  | 5.05E-12 | down | CHST12       | CHST12       |
| FAM214A      | 1542.17403  | 630.0947166 | 1.291324961  | 5.16E-12 | up   | FAM214A      | xp_005254603 |

|              |             |             |              |          |      |              |              |
|--------------|-------------|-------------|--------------|----------|------|--------------|--------------|
| FAM102A      | 309.3140701 | 162.4472484 | 0.929101153  | 5.60E-12 | up   | FAM102A      | FAM102A      |
| MIRLET7D     | 12.31898645 | 59.83212155 | -2.280036657 | 5.73E-12 | down | MIRLET7D     |              |
| HIF1A        | 3605.075991 | 1680.261334 | 1.101344035  | 5.94E-12 | up   | HIF1A        | HIF1A        |
| HOMER3       | 247.7540172 | 517.2624551 | -1.061988029 | 6.06E-12 | down | HOMER3       | xp_005251712 |
| B4GALT4      | 1023.441981 | 476.0712364 | 1.104179948  | 6.77E-12 | up   | B4GALT4      | xp_005247913 |
| PRDM11       | 123.3879452 | 421.4570347 | -1.772184111 | 7.63E-12 | down | PRDM11       | PRDM11       |
| UBQLN1       | 1866.748318 | 1064.660908 | 0.810133423  | 8.09E-12 | up   | UBQLN1       | UBQLN1       |
| CHUK         | 396.9037362 | 828.7908149 | -1.062218871 | 9.75E-12 | down | CHUK         | CHUK         |
| STK38L       | 2893.378351 | 1041.792816 | 1.473686595  | 9.88E-12 | up   | STK38L       | STK38L       |
| CLDN5        | 134.3195837 | 329.1557278 | -1.293100639 | 1.02E-11 | down | CLDN5        | CLDN5        |
| PTP4A3       | 390.9753714 | 195.5128948 | 0.999813969  | 1.08E-11 | up   | PTP4A3       | xp_005250822 |
| MFI2         | 38.6315537  | 130.2723475 | -1.753679274 | 1.31E-11 | down | MFI2         | MFI2         |
| EIF3F        | 1462.195108 | 974.4430837 | 0.585486003  | 1.57E-11 | up   | EIF3F        | EIF3F        |
| CYSLTR1      | 36.89129094 | 113.8353799 | -1.625596836 | 1.65E-11 | down | CYSLTR1      | xp_005262118 |
| ENTPD4       | 732.35655   | 274.9288878 | 1.413487696  | 1.92E-11 | up   | ENTPD4       | ENTPD4       |
| ADD3         | 1648.509627 | 1002.910809 | 0.716969002  | 2.03E-11 | up   | ADD3         | ADD3         |
| LOC422171    | 980.067713  | 1545.215439 | -0.656854664 | 2.11E-11 | down | LOC422171    | ARHGAP20     |
| RSBN1        | 264.031499  | 426.57857   | -0.692101437 | 2.35E-11 | down | RSBN1        |              |
| FAM53B       | 74.82945732 | 203.84886   | -1.445821671 | 2.43E-11 | down | FAM53B       | xp_005270357 |
| AFF4         | 3336.98208  | 1756.051153 | 0.926209068  | 2.56E-11 | up   | AFF4         | AFF4         |
| TNFAIP3      | 668.2612546 | 342.7713729 | 0.963165604  | 2.77E-11 | up   | TNFAIP3      |              |
| LOC101750431 | 25.09435215 | 2.340024393 | 3.422767228  | 3.22E-11 | up   | LOC101750431 |              |
| TMEM186      | 113.2109874 | 201.5342197 | -0.832010842 | 4.08E-11 | down | TMEM186      |              |
| CTH          | 486.8496478 | 146.7125515 | 1.730483997  | 4.86E-11 | up   | CTH          | CTH          |
| RGS9         | 170.0253436 | 69.97890725 | 1.280757766  | 5.78E-11 | up   | RGS9         |              |
| CMIP         | 1404.167044 | 804.063302  | 0.804333582  | 6.26E-11 | up   | CMIP         | CMIP         |
| LOC101749989 | 3.333693176 | 49.13619015 | -3.881592766 | 6.32E-11 | down | LOC101749989 |              |
| PMAIP1       | 52.98516598 | 15.15247532 | 1.806035019  | 6.40E-11 | up   | PMAIP1       |              |
| TRADD        | 248.853709  | 483.1435588 | -0.957154038 | 7.46E-11 | down | TRADD        | TRADD        |
| TFCP2L1      | 122.35159   | 43.17253537 | 1.502847124  | 7.71E-11 | up   | TFCP2L1      | TFCP2L1      |
| EPHA1        | 178.2705398 | 306.9284699 | -0.783834163 | 7.75E-11 | down | EPHA1        | EPHA1        |
| ITPRIPL2     | 272.074578  | 613.8448164 | -1.173871819 | 8.23E-11 | down | ITPRIPL2     | ITPRIPL2     |
| LOC417447    | 531.8271875 | 322.1994212 | 0.723003629  | 1.36E-10 | up   | LOC417447    |              |
| C3ORF70      | 77.97706372 | 206.3999772 | -1.404321076 | 1.74E-10 | down | C3ORF70      |              |
| KCNQ1        | 573.3130292 | 131.1416281 | 2.128197356  | 2.04E-10 | up   | KCNQ1        | KCNQ1        |
| TESK2        | 79.16534786 | 18.93874994 | 2.063527966  | 2.09E-10 | up   | TESK2        | TESK2        |
| PRIMPOL      | 125.7290492 | 28.08989694 | 2.162194781  | 2.12E-10 | up   | PRIMPOL      |              |
| PIGQ         | 103.9101772 | 184.6858284 | -0.829736206 | 2.19E-10 | down | PIGQ         |              |
| ENTPD2L      | 91.41517586 | 196.8149831 | -1.106334462 | 2.32E-10 | down | ENTPD2L      |              |
| REL          | 881.152196  | 518.7068125 | 0.764471911  | 2.34E-10 | up   | REL          | REL          |
| LOC101751133 | 76.48228598 | 145.4094918 | -0.926923896 | 3.01E-10 | down | LOC101751133 |              |
| PIK3AP1      | 451.2606411 | 249.2882019 | 0.856146347  | 3.29E-10 | up   | PIK3AP1      | PIK3AP1      |
| SPTY2D1      | 572.2788731 | 350.8933524 | 0.705685731  | 3.44E-10 | up   | SPTY2D1      | SPTY2D1      |
| TADA2A       | 60.92141552 | 158.7731759 | -1.381945827 | 3.71E-10 | down | TADA2A       | xp_005257684 |
| RFFL         | 1027.738987 | 579.2273987 | 0.82727216   | 3.74E-10 | up   | RFFL         | RFFL         |
| FJX1         | 103.1670268 | 250.9262138 | -1.28228125  | 4.65E-10 | down | FJX1         |              |
| JMJD6        | 441.7297798 | 1117.742599 | -1.339351991 | 4.77E-10 | down | JMJD6        | JMJD6        |
| GOPC         | 808.873142  | 501.0134235 | 0.691064201  | 5.12E-10 | up   | GOPC         |              |
| HESX1        | 68.04107926 | 23.15810796 | 1.554888637  | 5.45E-10 | up   | HESX1        | HESX1        |
| MMP16        | 324.3167033 | 85.06037484 | 1.930844211  | 5.54E-10 | up   | MMP16        | MMP16        |
| KIF16B       | 465.3331406 | 201.1589725 | 1.209927848  | 5.87E-10 | up   | KIF16B       | KIF16B       |
| PPARA        | 326.9834231 | 85.28312909 | 1.938885221  | 6.60E-10 | up   | PPARA        | xp_005261715 |
| LOC107053805 | 15.67939373 | 77.60617897 | -2.307301747 | 7.29E-10 | down | LOC107053805 |              |
| BICD2        | 4710.734459 | 2857.810872 | 0.721041567  | 7.72E-10 | up   | BICD2        | BICD2        |

|              |             |             |              |          |      |              |              |
|--------------|-------------|-------------|--------------|----------|------|--------------|--------------|
| ZNF592       | 432.8145685 | 662.9755209 | -0.615206541 | 8.37E-10 | down | ZNF592       | ZNF592       |
| LOC101751989 | 35.34281179 | 85.34392186 | -1.271871587 | 8.50E-10 | down | LOC101751989 |              |
| APCDD1       | 341.3267057 | 585.060275  | -0.777431968 | 8.51E-10 | down | APCDD1       | xp_005258140 |
| ULK1         | 93.47037068 | 373.4219193 | -1.998225594 | 8.85E-10 | down | ULK1         | ULK1         |
| SEPT11       | 3390.924417 | 2059.384999 | 0.719465062  | 8.90E-10 | up   | SEPT11       | SEPT11       |
| LOC107054677 | 1236.55921  | 588.6242401 | 1.070912462  | 1.02E-09 | up   | LOC107054677 |              |
| ELK4         | 499.8373546 | 251.2714066 | 0.992212214  | 1.10E-09 | up   | ELK4         | ELK4         |
| HOOK1        | 442.1477743 | 170.3097584 | 1.376367526  | 1.19E-09 | up   | HOOK1        | HOOK1        |
| SLC22A5      | 242.0116295 | 75.01710369 | 1.689784907  | 1.41E-09 | up   | SLC22A5      | SLC22A5      |
| RP11-101E3.5 | 572.8913851 | 899.0513869 | -0.650141935 | 1.45E-09 | down | RP11-101E3.5 |              |
| PEL11        | 935.8207931 | 614.2991524 | 0.607290892  | 1.52E-09 | up   | PEL11        | PEL11        |
| ASB7         | 164.4474522 | 73.13328193 | 1.169026645  | 1.69E-09 | up   | ASB7         | ASB7         |
| MAG13        | 436.0621378 | 835.540569  | -0.938176149 | 1.71E-09 | down | MAG13        | MAG13        |
| PRDM10       | 416.1260954 | 822.9392919 | -0.983765244 | 1.79E-09 | down | PRDM10       | PRDM10       |
| RRAGB        | 1152.074141 | 736.1838106 | 0.646095634  | 1.83E-09 | up   | RRAGB        |              |
| CCL20        | 147.6785482 | 1.917770851 | 6.266886118  | 1.94E-09 | up   | CCL20        | CCL20        |
| HORMAD2      | 832.7981186 | 1284.419088 | -0.625077295 | 2.16E-09 | down | HORMAD2      | xp_005261421 |
| TPRA1        | 288.7279851 | 463.242246  | -0.682055879 | 2.27E-09 | down | TPRA1        | TPRA1        |
| GTF2I        | 227.8236601 | 369.2101876 | -0.696524779 | 2.31E-09 | down | GTF2I        |              |
| ATXN1L       | 600.5851821 | 1061.827156 | -0.822108158 | 2.54E-09 | down | ATXN1L       |              |
| KCMF1        | 1093.766377 | 453.7050072 | 1.269478131  | 2.68E-09 | up   | KCMF1        | KCMF1        |
| LRRC8D       | 452.3161185 | 201.4468589 | 1.166932098  | 3.76E-09 | up   | LRRC8D       | LRRC8D       |
| NINJ1        | 331.6544164 | 127.3655553 | 1.380705569  | 4.07E-09 | up   | NINJ1        | NINJ1        |
| IL17RD       | 143.2771528 | 49.28047471 | 1.539720515  | 5.29E-09 | up   | IL17RD       | IL17RD       |
| FDXACB1      | 14.06260266 | 46.90284464 | -1.737811796 | 5.44E-09 | down | FDXACB1      | FDXACB1      |
| WTIP         | 566.6192443 | 216.4799588 | 1.388146131  | 5.71E-09 | up   | WTIP         | WTIP         |
| DSTYK        | 154.5888184 | 308.1406438 | -0.995153016 | 5.73E-09 | down | DSTYK        | DSTYK        |
| NFKBIA       | 4104.475146 | 1469.219962 | 1.482147348  | 5.95E-09 | up   | NFKBIA       | NFKBIA       |
| GRM7         | 44.86255646 | 163.2432521 | -1.863439618 | 6.10E-09 | down | GRM7         | GRM7         |
| XKR6         | 137.4292304 | 57.16169676 | 1.265568244  | 7.26E-09 | up   | XKR6         |              |
| GLUD1        | 868.3594782 | 441.7976411 | 0.974906689  | 7.75E-09 | up   | GLUD1        |              |
| TRAF3        | 1022.367507 | 359.3630389 | 1.508399952  | 8.10E-09 | up   | TRAF3        | TRAF3        |
| TFP12        | 211.8687253 | 121.4518087 | 0.802786667  | 8.20E-09 | up   | TFP12        | TFP12        |
| CSF2         | 68.24991487 | 2.679333189 | 4.670881343  | 9.83E-09 | up   | CSF2         |              |
| PHF20        | 524.7752893 | 873.367537  | -0.73488912  | 1.02E-08 | down | PHF20        | PHF20        |
| SEN2         | 372.3244246 | 216.5851192 | 0.781626137  | 1.03E-08 | up   | SEN2         | SEN2         |
| MYLK3        | 178.4741538 | 83.22175644 | 1.100682519  | 1.12E-08 | up   | MYLK3        | MYLK3        |
| MMACHC       | 87.90166607 | 35.01556755 | 1.327894039  | 1.14E-08 | up   | MMACHC       | MMACHC       |
| CENPO        | 76.34437886 | 170.5997959 | -1.160022079 | 1.19E-08 | down | CENPO        | CENPO        |
| ITPR2        | 1319.699927 | 805.9041912 | 0.711529686  | 1.23E-08 | up   | ITPR2        |              |
| VAPA         | 942.1562454 | 476.8706032 | 0.982368483  | 1.33E-08 | up   | VAPA         | VAPA         |
| TTL9         | 184.7991456 | 68.26469943 | 1.436746447  | 1.41E-08 | up   | TTL9         |              |
| PPP1R3C      | 47.43645703 | 116.0187494 | -1.290289808 | 1.45E-08 | down | PPP1R3C      | PPP1R3C      |
| METRNL       | 500.7734584 | 258.2930447 | 0.955149305  | 1.47E-08 | up   | METRNL       |              |
| LOC107054121 | 20.81945481 | 74.24340076 | -1.834330506 | 1.53E-08 | down | LOC107054121 |              |
| OTUD4        | 297.0467803 | 491.2031633 | -0.725629701 | 1.84E-08 | down | OTUD4        | OTUD4        |
| TBC1D20      | 197.2494842 | 677.5612503 | -1.780329841 | 1.85E-08 | down | TBC1D20      |              |
| SPG20        | 805.2416938 | 423.7349337 | 0.926259801  | 1.98E-08 | up   | SPG20        | SPG20        |
| PLEK2        | 478.9609931 | 1000.112552 | -1.062182297 | 2.03E-08 | down | PLEK2        | PLEK2        |
| MOB2         | 2015.04891  | 983.1028099 | 1.035400654  | 2.07E-08 | up   | MOB2         | MOB2         |
| MLLT3        | 431.1385158 | 204.3357706 | 1.07720967   | 2.17E-08 | up   | MLLT3        | MLLT3        |
| AR           | 57.60202117 | 197.0399475 | -1.774296809 | 2.18E-08 | down | AR           | AR           |
| CDCP1        | 1918.810771 | 1137.071874 | 0.754888994  | 2.25E-08 | up   | CDCP1        | CDCP1        |
| ARID4B       | 610.7864914 | 297.7473738 | 1.036579371  | 2.36E-08 | up   | ARID4B       | ARID4B       |

|              |             |             |              |          |      |              |              |
|--------------|-------------|-------------|--------------|----------|------|--------------|--------------|
| KIAA1467     | 258.569924  | 141.7436997 | 0.867269864  | 2.38E-08 | up   | KIAA1467     | FAM234B      |
| WBP2         | 1057.296078 | 470.9700062 | 1.166672346  | 2.42E-08 | up   | WBP2         | WBP2         |
| PLCXD2       | 58.85759562 | 8.626006882 | 2.770463836  | 2.47E-08 | up   | PLCXD2       | PLCXD2       |
| LOC107054622 | 45.7674229  | 13.72824135 | 1.737174237  | 2.66E-08 | up   | LOC107054622 |              |
| ARHGAP6      | 181.8021502 | 108.2555414 | 0.747928386  | 3.10E-08 | up   | ARHGAP6      | ARHGAP6      |
| RFX3         | 305.6784219 | 109.8313183 | 1.476725218  | 3.30E-08 | up   | RFX3         | RFX3         |
| C1H7ORF60    | 363.1746198 | 102.541281  | 1.824458559  | 3.38E-08 | up   | C1H7ORF60    | C7orf60      |
| SPTAN1       | 4737.91792  | 7270.463342 | -0.617794104 | 3.49E-08 | down | SPTAN1       | xp_005252202 |
| LRRC45       | 96.41745488 | 293.3555596 | -1.605284081 | 4.25E-08 | down | LRRC45       | LRRC45       |
| FAM84A       | 93.05064083 | 210.889503  | -1.180399296 | 4.30E-08 | down | FAM84A       | FAM84A       |
| LOC425462    | 40.05612443 | 151.9289358 | -1.923301918 | 4.44E-08 | down | LOC425462    | PHRF1        |
| TRMT10B      | 96.98198537 | 178.8825529 | -0.88322399  | 4.74E-08 | down | TRMT10B      | TRMT10B      |
| KCTD12       | 129.8816601 | 265.6312044 | -1.032226904 | 4.82E-08 | down | KCTD12       | KCTD12       |
| ELMO1        | 1264.88357  | 629.3581271 | 1.007051494  | 5.06E-08 | up   | ELMO1        | ELMO1        |
| LOC107053487 | 85.68913027 | 30.76246401 | 1.477941144  | 5.51E-08 | up   | LOC107053487 |              |
| FNIP2        | 1153.888039 | 488.6351787 | 1.239673609  | 5.63E-08 | up   | FNIP2        | FNIP2        |
| PPP1R13B     | 1975.837147 | 1117.451355 | 0.822252012  | 5.70E-08 | up   | PPP1R13B     | xp_005267543 |
| VGLL4        | 1854.770436 | 1096.510891 | 0.758320494  | 5.84E-08 | up   | VGLL4        | VGLL4        |
| LRRN4        | 5282.037401 | 9568.014698 | -0.857125089 | 6.22E-08 | down | LRRN4        | LRRN4        |
| NFKBIZ       | 870.3096174 | 440.7628104 | 0.981526238  | 6.38E-08 | up   | NFKBIZ       | NFKBIZ       |
| ATP1B1       | 832.6850806 | 555.1068416 | 0.585005501  | 6.42E-08 | up   | ATP1B1       | ATP1B1       |
| FAM98A       | 455.4435811 | 835.3650884 | -0.875134503 | 6.51E-08 | down | FAM98A       | FAM98A       |
| NIPAL3       | 2238.240463 | 932.7463685 | 1.262808296  | 6.54E-08 | up   | NIPAL3       | xp_005246003 |
| PRRG1        | 421.8582323 | 133.9740012 | 1.654805194  | 7.06E-08 | up   | PRRG1        | PRRG1        |
| LOC101750112 | 719.9291276 | 293.2300919 | 1.295821726  | 7.26E-08 | up   | LOC101750112 |              |
| TGM6L        | 302.5471576 | 130.0220407 | 1.218403828  | 7.44E-08 | up   | TGM6L        |              |
| EPHA7        | 50.15382494 | 14.63340549 | 1.777094178  | 7.45E-08 | up   | EPHA7        | xp_005248727 |
| RIOK3        | 3134.007806 | 1112.379479 | 1.494359738  | 8.34E-08 | up   | RIOK3        | RIOK3        |
| TSHZ2        | 334.6060393 | 187.9836144 | 0.83185657   | 8.66E-08 | up   | TSHZ2        | TSHZ2        |
| LRRC58       | 773.565958  | 437.0696188 | 0.82366121   | 8.73E-08 | up   | LRRC58       |              |
| FGF14        | 77.08709253 | 22.85716853 | 1.753842617  | 9.36E-08 | up   | FGF14        | FGF14        |
| PDZD11       | 672.8862827 | 441.9498454 | 0.606480056  | 9.54E-08 | up   | PDZD11       | xp_005262329 |
| UHRF1BP1L    | 877.2625205 | 334.8778526 | 1.389373668  | 1.01E-07 | up   | UHRF1BP1L    | UHRF1BP1L    |
| FAM199X      | 556.9371718 | 221.3018915 | 1.331498804  | 1.04E-07 | up   | FAM199X      | FAM199X      |
| REPS1        | 1487.621759 | 984.4049589 | 0.595683925  | 1.09E-07 | up   | REPS1        | REPS1        |
| CD81         | 1555.488588 | 976.0140421 | 0.672394001  | 1.11E-07 | up   | CD81         | CD81         |
| SEMA3C       | 5918.810959 | 3168.358954 | 0.901571587  | 1.14E-07 | up   | SEMA3C       | SEMA3C       |
| RECQL5       | 99.29070541 | 191.1055501 | -0.944639099 | 1.19E-07 | down | RECQL5       | RECQL5       |
| HIST1H2B0    | 168.2789473 | 63.13410698 | 1.414363189  | 1.24E-07 | up   | HIST1H2B8    | HIST2H2BE    |
| TET2         | 2179.073519 | 1266.671813 | 0.782672092  | 1.24E-07 | up   | TET2         | TET2         |
| JAK1         | 3301.732361 | 2027.314035 | 0.703653597  | 1.27E-07 | up   | JAK1         | JAK1         |
| LANCL1       | 237.2017075 | 534.0480774 | -1.170855231 | 1.33E-07 | down | LANCL1       | LANCL1       |
| TRAK2        | 284.5114759 | 163.9256489 | 0.79544524   | 1.36E-07 | up   | TRAK2        | xp_005246853 |
| LOC100858624 | 15.72872007 | 58.68509287 | -1.899592802 | 1.39E-07 | down | LOC100858624 | KCNE5        |
| LOC107052462 | 68.4926467  | 245.3717857 | -1.840948353 | 1.48E-07 | down | LOC107052462 |              |
| ZNF423       | 134.0936691 | 270.5932728 | -1.012884847 | 1.49E-07 | down | ZNF423       | xp_005255911 |
| IL13RA1      | 514.4083179 | 212.2330613 | 1.277264557  | 1.69E-07 | up   | IL13RA1      | IL13RA1      |
| ZBTB5        | 238.6954636 | 432.7562915 | -0.858383646 | 1.85E-07 | down | ZBTB5        | ZBTB5        |
| K123         | 147.6165334 | 71.14201761 | 1.05308052   | 1.85E-07 | up   | K123         | ENDOD1       |
| LOC107049951 | 0.929237176 | 31.12710218 | -5.06598059  | 2.00E-07 | down | LOC107049951 |              |
| LOC431205    | 57.85669307 | 169.7560526 | -1.552907244 | 2.13E-07 | down | LOC431205    |              |
| RRP1B        | 1394.270104 | 651.8231613 | 1.096957552  | 2.23E-07 | up   | RRP1B        | RRP1B        |
| EFCAB14      | 375.0439609 | 218.6780951 | 0.778250998  | 2.55E-07 | up   | EFCAB14      | EFCAB14      |
| EIF4E3       | 95.61606446 | 43.67538781 | 1.130432512  | 2.60E-07 | up   | EIF4E3       | EIF4E3       |

|              |             |             |              |          |      |              |              |
|--------------|-------------|-------------|--------------|----------|------|--------------|--------------|
| HIST1H2B7L2  | 746.0858757 | 240.6446669 | 1.632437246  | 2.62E-07 | up   | HIST1H2B7L2  | HIST2H2BE    |
| ASAP1        | 360.9873552 | 206.3533316 | 0.806831572  | 2.93E-07 | up   | ASAP1        | ASAP1        |
| RIN2         | 1805.525342 | 1189.574623 | 0.601972894  | 2.99E-07 | up   | RIN2         | RIN2         |
| FAM171B      | 115.298168  | 31.70117009 | 1.862761593  | 3.12E-07 | up   | FAM171B      | FAM171B      |
| LOC101752215 | 4.467254289 | 25.38606593 | -2.506576554 | 3.37E-07 | down | LOC101752215 |              |
| RAB3A        | 690.1147059 | 384.6049608 | 0.843458805  | 3.41E-07 | up   | RAB3A        |              |
| C4H4orf32    | 149.8867358 | 235.6581685 | -0.652822971 | 3.53E-07 | down | C4H4ORF32    |              |
| MICAL2       | 1679.941157 | 691.7408836 | 1.28010707   | 3.64E-07 | up   | MICAL2       | xp_005253302 |
| LOC423919    | 1471.484759 | 719.0054719 | 1.033197944  | 3.74E-07 | up   | LOC423919    | SHTN1        |
| LOC417131    | 20.68357939 | 97.97599686 | -2.243942474 | 3.98E-07 | down | LOC417131    |              |
| KIAA1958     | 200.5722321 | 308.5184576 | -0.621234916 | 4.18E-07 | down | KIAA1958     | xp_005251796 |
| PKDCCb       | 80.02586332 | 191.7743599 | -1.260871605 | 4.22E-07 | down | PKDCCb       |              |
| XRCC3        | 235.2918366 | 423.6991226 | -0.848588874 | 4.60E-07 | down | XRCC3        | xp_005268104 |
| RASGEF1B     | 889.410529  | 358.9801596 | 1.308945373  | 4.83E-07 | up   | RASGEF1B     | RASGEF1B     |
| CDCA7        | 108.3451571 | 212.8877239 | -0.974458091 | 4.84E-07 | down | CDCA7        | xp_005246940 |
| DARS2        | 114.9546036 | 213.4200373 | -0.892631389 | 4.85E-07 | down | DARS2        | DARS2        |
| H6PD         | 578.4719316 | 357.3179735 | 0.695038474  | 4.97E-07 | up   | H6PD         | H6PD         |
| ABHD17C      | 480.3231392 | 283.813957  | 0.759059773  | 5.08E-07 | up   | ABHD17C      | ABHD17C      |
| LOC107055786 | 1.894375337 | 32.62952133 | -4.106383715 | 5.11E-07 | down | LOC107055786 |              |
| LDHA         | 39604.29731 | 18708.63121 | 1.08195297   | 5.21E-07 | up   | LDHA         | LDHA         |
| SLX4         | 247.3420159 | 608.7342843 | -1.299305291 | 5.45E-07 | down | SLX4         | SLX4         |
| LOC101748464 | 19.15042068 | 77.37444846 | -2.014481136 | 5.84E-07 | down | LOC101748464 |              |
| ABCC1        | 5397.265447 | 2337.441892 | 1.207298143  | 5.98E-07 | up   | ABCC1        | ABCC1        |
| POLR1B       | 262.168513  | 604.4486102 | -1.205125263 | 6.25E-07 | down | POLR1B       |              |
| TRA2A        | 2043.435384 | 1229.954269 | 0.732391948  | 6.46E-07 | up   | TRA2A        | TRA2A        |
| BPI          | 92.6287042  | 396.4678757 | -2.097672738 | 6.85E-07 | down | BPI          | BPI          |
| GPR157       | 101.1741238 | 523.8283411 | -2.372253762 | 7.02E-07 | down | GPR157       | GPR157       |
| SRPK2        | 612.4142009 | 345.396242  | 0.826255351  | 7.11E-07 | up   | SRPK2        |              |
| GOLGA4       | 610.6824036 | 363.6405266 | 0.747909283  | 7.14E-07 | up   | GOLGA4       |              |
| ITPK1        | 814.5441413 | 521.9985961 | 0.641946956  | 7.23E-07 | up   | ITPK1        | xp_005267644 |
| BTBD10       | 1243.378281 | 633.2027807 | 0.973525788  | 7.28E-07 | up   | BTBD10       | BTBD10       |
| DSP          | 4183.588331 | 2497.078438 | 0.744499757  | 7.65E-07 | up   | DSP          | DSP          |
| ADPRHL2      | 309.1414086 | 510.2323444 | -0.722887444 | 7.75E-07 | down | ADPRHL2      | ADPRHL2      |
| TLE4         | 45.27632782 | 146.9596637 | -1.698591374 | 7.94E-07 | down | TLE4         | TLE4         |
| GABRG1       | 36.43287999 | 6.638399139 | 2.456333763  | 8.07E-07 | up   | GABRG1       | GABRG1       |
| DAB2IP       | 1055.130236 | 2755.973982 | -1.385141184 | 8.41E-07 | down | DAB2IP       | DAB2IP       |
| TXNDC15      | 334.8065999 | 220.3676015 | 0.603415833  | 8.44E-07 | up   | TXNDC15      | xp_005272138 |
| LRRK1        | 67.39410156 | 150.2037624 | -1.156226715 | 8.77E-07 | down | LRRK1        | LRRK1        |
| DSC2         | 1437.683523 | 593.7904442 | 1.275720349  | 8.89E-07 | up   | DSC2         | DSC2         |
| KLHL11       | 519.3866514 | 331.207242  | 0.649074718  | 8.92E-07 | up   | KLHL11       | KLHL11       |
| MIA3         | 653.5563494 | 1232.590891 | -0.9153105   | 9.20E-07 | down | MIA3         | MIA3         |
| VLDLR        | 115.0109485 | 229.6883625 | -0.997906556 | 9.51E-07 | down | VLDLR        | VLDLR        |
| SRSF3        | 2153.751629 | 3498.402819 | -0.699844529 | 9.57E-07 | down | SRSF3        | SRSF3        |
| ZNF106       | 491.6109689 | 224.8144775 | 1.128782161  | 9.70E-07 | up   | ZNF106       | ZNF106       |
| UBE2E2       | 427.6570033 | 170.4619799 | 1.327004171  | 9.91E-07 | up   | UBE2E2       |              |
| TOLLIP       | 947.0586327 | 314.6987238 | 1.589482418  | 1.01E-06 | up   | TOLLIP       | TOLLIP       |
| TM7SF3       | 520.6001759 | 258.4423775 | 1.010333147  | 1.09E-06 | up   | TM7SF3       | TM7SF3       |
| NKX2-1       | 157.1561371 | 1028.470096 | -2.710229329 | 1.12E-06 | down | NKX2-1       | xp_005268088 |
| LOC107056213 | 40.7260145  | 11.4328602  | 1.832764265  | 1.19E-06 | up   | LOC107056213 |              |
| SLC22A15     | 30.90532492 | 5.533667846 | 2.481547478  | 1.21E-06 | up   | SLC22A15     | SLC22A15     |
| CD44         | 7625.456104 | 4665.303737 | 0.708852621  | 1.21E-06 | up   | CD44         | CD44         |
| RBMX         | 1257.418595 | 2078.539391 | -0.725105086 | 1.27E-06 | down | RBMX         | RBMX         |
| LOC107054784 | 9.827844768 | 43.19565461 | -2.135939212 | 1.30E-06 | down | LOC107054784 |              |
| RPS6KA5      | 502.5199913 | 173.6369244 | 1.533107217  | 1.36E-06 | up   | RPS6KA5      | RPS6KA5      |



|              |             |             |              |          |      |              |              |
|--------------|-------------|-------------|--------------|----------|------|--------------|--------------|
| SGPL1        | 1692.129165 | 919.7118133 | 0.879585921  | 1.44E-06 | up   | SGPL1        | SGPL1        |
| EREG         | 422.1899778 | 76.03778308 | 2.473103956  | 1.47E-06 | up   | EREG         | EREG         |
| ACOT4        | 17.99584229 | 51.68185199 | -1.52199414  | 1.51E-06 | down | ACOT4        | ACOT2        |
| SFPQ         | 2157.131108 | 4240.553964 | -0.975138879 | 1.51E-06 | down | SFPQ         | SFPQ         |
| SMARCA1      | 483.7873938 | 202.1561803 | 1.258902867  | 1.56E-06 | up   | SMARCA1      | xp_005262517 |
| LOC431656    | 599.958075  | 1149.528457 | -0.938108587 | 1.59E-06 | down | LOC431656    | ATP8B2       |
| PLAG1        | 161.3792127 | 44.58339005 | 1.855876531  | 1.64E-06 | up   | PLAG1        | PLAG1        |
| ZNFX1        | 118.0856063 | 232.6578731 | -0.978376886 | 1.66E-06 | down | ZNFX1        |              |
| IGF2R        | 1741.250097 | 703.5380165 | 1.307423145  | 1.74E-06 | up   | IGF2R        | IGF2R        |
| SHPK         | 286.9080553 | 607.0255867 | -1.081168855 | 1.75E-06 | down | SHPK         | SHPK         |
| NR3C2        | 586.4477319 | 344.5911697 | 0.767116799  | 1.88E-06 | up   | NR3C2        | NR3C2        |
| CLMP         | 790.0352504 | 1820.567049 | -1.204398943 | 1.94E-06 | down | CLMP         | CLMP         |
| LETM2        | 444.7190467 | 281.7327234 | 0.658567051  | 1.94E-06 | up   | LETM2        | LETM2        |
| NOS2         | 268.7286062 | 115.3776018 | 1.219786723  | 2.02E-06 | up   | NOS2         | NOS2         |
| LOC107054755 | 4.977334953 | 25.66713138 | -2.366476683 | 2.05E-06 | down | LOC107054755 |              |
| RPAIN        | 198.8614751 | 102.7282153 | 0.952931327  | 2.07E-06 | up   | RPAIN        | RPAIN        |
| PPP2R2B      | 605.521052  | 276.9035585 | 1.128793525  | 2.08E-06 | up   | PPP2R2B      | PPP2R2B      |
| GRHL1        | 1644.494767 | 1082.072846 | 0.603846792  | 2.09E-06 | up   | GRHL1        |              |
| ACER2        | 217.5438227 | 60.16272969 | 1.85436412   | 2.09E-06 | up   | ACER2        | ACER2        |
| PMP22        | 2673.896151 | 1705.806599 | 0.648489349  | 2.14E-06 | up   | PMP22        | PMP22        |
| SOAT1        | 1130.051441 | 555.5252809 | 1.024463975  | 2.29E-06 | up   | SOAT1        | SOAT1        |
| ERCC6L2      | 268.1792442 | 100.7986473 | 1.411721305  | 2.33E-06 | up   | CZH9ORF102   | ERCC6L2      |
| HBAA         | 9.519307928 | 89.94047886 | -3.24004197  | 2.45E-06 | down | HBAA         | HBA1         |
| TRPC6        | 351.6061025 | 139.6708865 | 1.331928779  | 2.49E-06 | up   | TRPC6        | TRPC6        |
| CAB39        | 2039.484017 | 911.8555813 | 1.161326946  | 2.49E-06 | up   | CAB39        | CAB39        |
| LOC107056043 | 39.72921383 | 6.795736766 | 2.54749837   | 2.57E-06 | up   | LOC107056043 |              |
| COX11        | 214.7803453 | 99.74704329 | 1.106515995  | 2.82E-06 | up   | COX11        | COX11        |
| PID1         | 721.2147388 | 333.4878481 | 1.112794688  | 2.83E-06 | up   | PID1         | PID1         |
| ENDOD1       | 1441.079729 | 2644.241901 | -0.875704007 | 2.88E-06 | down | ENDOD1       | ENDOD1       |
| LOC107051649 | 176.2349039 | 68.07320913 | 1.372340655  | 2.91E-06 | up   | LOC107051649 |              |
| GLE1         | 278.2472042 | 445.6144755 | -0.679428907 | 3.01E-06 | down | GLE1         | GLE1         |
| LOC107051007 | 0           | 33.58706209 | -20          | 3.01E-06 | down | LOC107051007 |              |
| GAN          | 584.7437799 | 237.827548  | 1.297888776  | 3.13E-06 | up   | GAN          | GAN          |
| AHRR         | 480.7272215 | 178.0487572 | 1.432946133  | 3.19E-06 | up   | AHRR         | AHRR         |
| ISM1         | 384.741779  | 694.6672355 | -0.852431553 | 3.24E-06 | down | ISM1         | ISM1         |
| PQLC1        | 526.5070636 | 947.4313475 | -0.84756852  | 3.24E-06 | down | PQLC1        | PQLC1        |
| MKS1         | 186.1323708 | 357.4684468 | -0.941486923 | 3.32E-06 | down | MKS1         | MKS1         |
| FOS          | 997.2288997 | 329.9278705 | 1.595774039  | 3.41E-06 | up   | FOS          | FOS          |
| MAP3K7CL     | 370.5203347 | 134.3757659 | 1.463279744  | 3.48E-06 | up   | MAP3K7CL     |              |
| RAB31        | 1021.326218 | 568.1804073 | 0.846022758  | 3.65E-06 | up   | RAB31        |              |
| WBSR16       | 111.6471878 | 247.7123023 | -1.149718607 | 3.67E-06 | down | WBSR16       | WBSR16       |
| LOC428586    | 1034.702452 | 423.7242985 | 1.288018186  | 3.68E-06 | up   | LOC428586    |              |
| SPECC1L      | 3532.308807 | 2149.155221 | 0.71684179   | 3.87E-06 | up   | SPECC1L      | SPECC1L      |
| GALNT18      | 427.3627653 | 189.5138183 | 1.17315817   | 3.97E-06 | up   | GALNT18      | GALNT18      |
| LOC422320    | 298.6116015 | 450.8545302 | -0.594391801 | 4.01E-06 | down | LOC422320    | LNX2         |
| ADPGK        | 293.3629524 | 466.3397935 | -0.668694852 | 4.03E-06 | down | ADPGK        | ADPGK        |
| PDE7B        | 250.0633221 | 166.2418713 | 0.589009667  | 4.11E-06 | up   | PDE7B        |              |
| LOC100859041 | 52.47071024 | 20.97776704 | 1.322651199  | 4.29E-06 | up   | LOC100859041 | ANKRD13C     |
| SLC45A3      | 170.3070298 | 430.2509204 | -1.337040292 | 4.33E-06 | down | SLC45A3      | SLC45A3      |
| SNAP47       | 338.9091091 | 162.118485  | 1.063849815  | 4.50E-06 | up   | SNAP47       | SNAP47       |
| TSPAN5       | 266.4782859 | 75.78942803 | 1.813949455  | 4.55E-06 | up   | TSPAN5       | TSPAN17      |
| CASP3        | 1407.272987 | 416.8755399 | 1.755213585  | 4.58E-06 | up   | CASP3        | CASP3        |
| PRKCD        | 946.0596021 | 421.842775  | 1.165225684  | 4.61E-06 | up   | PRKCD        | PRKCD        |
| ATP6V1A      | 1979.187348 | 1219.307843 | 0.698845769  | 4.62E-06 | up   | ATP6V1A      | ATP6V1A      |

|              |             |             |              |          |      |              |              |
|--------------|-------------|-------------|--------------|----------|------|--------------|--------------|
| ASB12        | 15.0756088  | 134.9172722 | -3.161786886 | 4.85E-06 | down | ASB12        | ASB12        |
| MTHFD2       | 992.90736   | 561.0846483 | 0.823440678  | 4.93E-06 | up   | MTHFD2       | MTHFD2       |
| HSPA2        | 16214.61386 | 7666.061456 | 1.080737199  | 5.08E-06 | up   | HSPA2        | HSPA2        |
| CCSER2       | 473.3960787 | 179.6301931 | 1.39801789   | 5.36E-06 | up   | CCSER2       | CCSER2       |
| SMC3         | 1416.943401 | 831.2832613 | 0.769370065  | 5.50E-06 | up   | SMC3         | SMC3         |
| LMO4         | 742.6260269 | 449.714432  | 0.723626695  | 5.79E-06 | up   | LMO4         | LMO4         |
| ESCO1        | 741.1039117 | 466.8715354 | 0.666650208  | 5.93E-06 | up   | ESCO1        | ESCO1        |
| HCN2         | 35.253346   | 11.91191063 | 1.565355359  | 5.98E-06 | up   | HCN2         | HCN2         |
| LCP1         | 91.07992491 | 203.5971876 | -1.160512626 | 6.64E-06 | down | LCP1         | LCP1         |
| SLK          | 2506.303901 | 1540.444195 | 0.702214939  | 6.71E-06 | up   | SLK          | SLK          |
| DNM1L        | 3102.0921   | 1952.603072 | 0.667842814  | 7.23E-06 | up   | DNM1L        | DNM1L        |
| NABP1        | 390.2923677 | 931.9124549 | -1.255639182 | 7.95E-06 | down | NABP1        | NABP1        |
| NLGN4X       | 105.4840487 | 52.80031911 | 0.998406297  | 8.02E-06 | up   | NLGN4X       | NLGN4X       |
| ATOH8        | 139.7626214 | 318.5550722 | -1.188564237 | 8.12E-06 | down | ATOH8        | ATOH8        |
| INPP5D       | 12.95151718 | 40.94313095 | -1.660500321 | 8.35E-06 | down | INPP5D       | INPL1        |
| PLXNC1       | 123.7032005 | 254.3387008 | -1.039868176 | 8.35E-06 | down | PLXNC1       | PLXNC1       |
| PHTF2        | 549.0689456 | 223.8755679 | 1.294290225  | 8.91E-06 | up   | PHTF2        | PHTF2        |
| SLC25A38     | 116.1785155 | 196.2089596 | -0.75604762  | 9.07E-06 | down | SLC25A38     | SLC25A38     |
| LOC107055870 | 0.929237176 | 14.62657151 | -3.976400956 | 9.09E-06 | down | LOC107055870 |              |
| LOC107050667 | 127.8200084 | 509.6062481 | -1.995269278 | 9.23E-06 | down | LOC107050667 |              |
| TNFAIP8L3    | 38.73298649 | 13.10179681 | 1.563798064  | 9.48E-06 | up   | TNFAIP8L3    | TNFAIP8L3    |
| DENND1A      | 156.5719226 | 91.86556288 | 0.76922947   | 9.86E-06 | up   | DENND1A      | DENND1A      |
| LOC418424    | 74.62381163 | 142.3569138 | -0.931804605 | 9.86E-06 | down | LOC418424    | CD200        |
| GPC2         | 933.4677721 | 527.2213982 | 0.824191288  | 9.87E-06 | up   | GPC2         | GPC2         |
| WNT5A        | 527.0076572 | 920.832344  | -0.805114585 | 1.00E-05 | down | WNT5A        | WNT5A        |
| USP32        | 558.6836932 | 303.2305187 | 0.881616751  | 1.00E-05 | up   | USP32        | USP32        |
| PSTPIP1      | 2.686278737 | 21.73705139 | -3.016475337 | 1.04E-05 | down | PSTPIP1      | PSTPIP1      |
| LOC107050933 | 109.4061948 | 223.8794239 | -1.033027511 | 1.06E-05 | down | LOC107050933 |              |
| RIF1         | 836.1809458 | 1506.803293 | -0.849604018 | 1.07E-05 | down | RIF1         | RIF1         |
| GTF3C4       | 86.34881185 | 239.5271712 | -1.471941088 | 1.15E-05 | down | GTF3C4       | GTF3C4       |
| ARHGEF3      | 330.7073519 | 85.52657579 | 1.951110433  | 1.15E-05 | up   | ARHGEF3      | ARHGEF3      |
| ALDH18A1     | 2949.326499 | 1317.738084 | 1.162321895  | 1.15E-05 | up   | ALDH18A1     | ALDH18A1     |
| SLC35G1      | 469.4033042 | 177.2691615 | 1.404886417  | 1.16E-05 | up   | SLC35G1      | SLC35G1      |
| NF2L         | 24.62308919 | 57.69457027 | -1.228423779 | 1.17E-05 | down | NF2L         | NF2L         |
| PRPF38B      | 965.2465318 | 476.0120299 | 1.019899431  | 1.22E-05 | up   | PRPF38B      | PRPF38B      |
| LOC107056777 | 413.020387  | 184.4175315 | 1.163237185  | 1.22E-05 | up   | LOC107056777 |              |
| SNAPC1       | 395.4299218 | 190.7670598 | 1.051609963  | 1.25E-05 | up   | SNAPC1       | SNAPC1       |
| CAMK2D       | 711.7374808 | 413.8810408 | 0.782129049  | 1.25E-05 | up   | CAMK2D       | CAMK2D       |
| FILIP1       | 216.2319303 | 122.9157906 | 0.814909311  | 1.27E-05 | up   | FILIP1       | FILIP1       |
| ASTE1        | 8.539286057 | 37.45917435 | -2.13313174  | 1.34E-05 | down | ASTE1        | ASTE1        |
| PARD6B       | 368.0449887 | 150.0120554 | 1.294803683  | 1.35E-05 | up   | PARD6B       | PARD6B       |
| CCNL2        | 1330.570911 | 2039.441467 | -0.616128703 | 1.35E-05 | down | CCNL2        | CCNL2        |
| SLC25A33     | 362.6746111 | 97.17445684 | 1.90002671   | 1.37E-05 | up   | SLC25A33     | SLC25A33     |
| TECPR1       | 55.32103686 | 110.5958373 | -0.999396983 | 1.39E-05 | down | TECPR1       | TECPR1       |
| STYX         | 649.77546   | 297.2665621 | 1.128184067  | 1.45E-05 | up   | STYX         | STYX         |
| TNFRSF1A     | 210.7480047 | 431.6230272 | -1.034252863 | 1.45E-05 | down | TNFRSF1A     | TNFRSF1A     |
| DENND3       | 428.3525204 | 145.2868033 | 1.559894912  | 1.47E-05 | up   | DENND3       | DENND3       |
| GJC2         | 313.6127917 | 535.1834316 | -0.771049047 | 1.48E-05 | down | GJC2         | GJC1         |
| UVSSA        | 256.5692656 | 161.0610273 | 0.67174092   | 1.50E-05 | up   | UVSSA        | UVSSA        |
| NOC2L        | 978.8256775 | 1507.910365 | -0.623426819 | 1.54E-05 | down | NOC2L        | xp_005244796 |
| PSAT1        | 423.5144144 | 149.6429291 | 1.500886962  | 1.56E-05 | up   | PSAT1        | PSAT1        |
| NUFIP1       | 491.0965363 | 264.927367  | 0.890409765  | 1.57E-05 | up   | NUFIP1       | NUFIP1       |
| PCF11        | 192.7204999 | 561.7866804 | -1.543512379 | 1.65E-05 | down | PCF11        | PCF11        |
| CCDC85C      | 573.463546  | 309.0123511 | 0.892037277  | 1.66E-05 | up   | CCDC85C      | CCDC85C      |

|              |             |             |              |          |      |              |              |
|--------------|-------------|-------------|--------------|----------|------|--------------|--------------|
| GUCY1A2      | 80.59124035 | 35.64270792 | 1.177016089  | 1.66E-05 | up   | GUCY1A2      | GUCY1A2      |
| LRIG2        | 578.6175557 | 929.2518296 | -0.683459527 | 1.69E-05 | down | LRIG2        | LRIG3        |
| LOC422372    | 257.8598945 | 430.1008698 | -0.738087644 | 1.74E-05 | down | LOC422372    |              |
| LOC422301    | 142.1933547 | 239.1722688 | -0.75019608  | 1.75E-05 | down | LOC422301    | xp_005277951 |
| LOC107057150 | 9.937006082 | 53.63433562 | -2.432273728 | 1.77E-05 | down | LOC107057150 |              |
| MAP3K5       | 2425.725022 | 1180.938052 | 1.03848273   | 1.82E-05 | up   | MAP3K5       |              |
| COQ5         | 404.0862998 | 231.8697254 | 0.801348975  | 1.89E-05 | up   | COQ5         | COQ5         |
| IPPK         | 519.2479689 | 212.2740349 | 1.290495755  | 1.95E-05 | up   | IPPK         | xp_005252191 |
| TBCCD1       | 115.3165687 | 291.6065842 | -1.338423481 | 1.99E-05 | down | TBCCD1       | TBCCD1       |
| LOC107055658 | 10701.20924 | 82.21474084 | 7.024161028  | 2.03E-05 | up   | LOC107055658 |              |
| MTFR1L       | 723.3460549 | 475.0310943 | 0.606664058  | 2.03E-05 | up   | FAM54B       | xp_005245999 |
| LOC107056573 | 55.54885805 | 24.08632347 | 1.205543056  | 2.13E-05 | up   | LOC107056573 |              |
| FASLG        | 50.38821643 | 15.59308853 | 1.692179679  | 2.16E-05 | up   | FASLG        | FASLG        |
| HIST1H2B7    | 55.89211072 | 11.27856425 | 2.309061232  | 2.18E-05 | up   | HIST1H2B7    | HIST2H2BE    |
| LOC107056112 | 48.05702076 | 11.60102768 | 2.0504946    | 2.19E-05 | up   | LOC107056112 |              |
| SNAPC3       | 27.16430563 | 121.7654446 | -2.1643207   | 2.25E-05 | down | SNAPC3       | xp_005251617 |
| FAM160A1     | 271.3877341 | 146.6527939 | 0.88795096   | 2.34E-05 | up   | FAM160A1     | FAM160A1     |
| LOC107050861 | 45.35921177 | 130.9522208 | -1.52957291  | 2.35E-05 | down | LOC107050861 |              |
| PHTF1        | 238.8203936 | 486.1294862 | -1.025414605 | 2.36E-05 | down | PHTF1        | PHTF1        |
| PELI2        | 194.7270899 | 113.0768462 | 0.784150051  | 2.45E-05 | up   | PELI2        | PELI2        |
| PRR5L        | 47.32627409 | 121.306964  | -1.357949124 | 2.46E-05 | down | PRR5L        | xp_005253199 |
| LOC107054527 | 60.50764416 | 26.00174847 | 1.218508775  | 2.46E-05 | up   | LOC107054527 |              |
| VEPH1        | 130.6176553 | 295.4877537 | -1.177748424 | 2.53E-05 | down | VEPH1        | xp_005247822 |
| MSANTD2      | 138.2825907 | 235.8624821 | -0.770326414 | 2.57E-05 | down | C11ORF61     | MSANTD2      |
| MCMBP        | 1956.733738 | 1050.401629 | 0.897506397  | 2.67E-05 | up   | MCMBP        | MCMBP        |
| IL17RA       | 2399.140175 | 1205.405121 | 0.992999353  | 2.82E-05 | up   | IL17RA       |              |
| TAF1D        | 703.6516073 | 454.3969623 | 0.630908106  | 3.02E-05 | up   | TAF1D        | TAF1D        |
| FAM65C       | 622.2309791 | 317.8915863 | 0.968915391  | 3.04E-05 | up   | FAM65C       |              |
| FBXW5        | 399.528585  | 1021.997085 | -1.355020449 | 3.04E-05 | down | FBXW5        | FBXW5        |
| SIX4         | 361.274563  | 223.7251452 | 0.691368265  | 3.07E-05 | up   | SIX4         | SIX4         |
| DCLRE1B      | 10.91834971 | 54.38209428 | -2.316376899 | 3.12E-05 | down | DCLRE1B      | DCLRE1B      |
| CTNBL1       | 543.2871553 | 927.4016396 | -0.771479339 | 3.19E-05 | down | CTNBL1       | CTNBL1       |
| SLC33A1      | 845.7521812 | 508.6186267 | 0.733650695  | 3.40E-05 | up   | SLC33A1      | SLC33A1      |
| TRUB2        | 174.4291094 | 400.0760394 | -1.197633405 | 3.43E-05 | down | TRUB2        |              |
| LOC107055055 | 55.20865869 | 17.78640158 | 1.634119887  | 3.54E-05 | up   | LOC107055055 |              |
| LOC100857745 | 135.9188475 | 268.9598847 | -0.984645487 | 3.62E-05 | down | LOC100857745 |              |
| SMYD4        | 103.8958668 | 165.9426498 | -0.675546466 | 3.75E-05 | down | SMYD4        | SMYD4        |
| ZFPM2        | 167.6676089 | 95.34882365 | 0.814316962  | 3.75E-05 | up   | ZFPM2        | ZFPM2        |
| TAX1BP1      | 2275.404086 | 967.7103231 | 1.233475617  | 3.78E-05 | up   | TAX1BP1      | TAX1BP1      |
| HIST1H2B8    | 27.85199612 | 5.717984869 | 2.28420202   | 3.80E-05 | up   | HIST1H2B8    | HIST2H2BE    |
| PPIG         | 1743.164782 | 1002.55538  | 0.798027023  | 3.81E-05 | up   | PPIG         | PPIG         |
| FBXO28       | 428.3214313 | 207.3901474 | 1.046346508  | 3.82E-05 | up   | FBXO28       |              |
| LOC107050887 | 0.611513454 | 112.9277431 | -7.528800004 | 4.08E-05 | down | LOC107050887 |              |
| USP53        | 752.2982507 | 365.6744317 | 1.04074498   | 4.18E-05 | up   | USP53        | USP53        |
| CANX         | 4559.033806 | 2273.257459 | 1.00396702   | 4.26E-05 | up   | CANX         | xp_005266054 |
| KIAA1211L    | 133.0526271 | 82.635467   | 0.687163975  | 4.44E-05 | up   | KIAA1211L    | KIAA1211L    |
| RWD2         | 150.9715439 | 272.059384  | -0.849644944 | 4.67E-05 | down | RWD2         |              |
| PEX11G       | 70.18853153 | 33.29812754 | 1.075794268  | 4.78E-05 | up   | PEX11G       | PEX11G       |
| SH3BP2       | 101.903112  | 38.62221685 | 1.39969523   | 4.88E-05 | up   | SH3BP2       | SH3BP2       |
| PPAPDC1A     | 183.4344098 | 59.5792105  | 1.622383383  | 4.89E-05 | up   | PPAPDC1A     | PPAPDC1A     |
| GTPBP2       | 53.63579727 | 109.8462929 | -1.03421808  | 4.91E-05 | down | GTPBP2       | GTPBP2       |
| FGFR10P2     | 686.7086066 | 219.0604561 | 1.648368967  | 4.94E-05 | up   | FGFR10P2     | FGFR10P2     |
| GRB10        | 596.7178802 | 228.5773615 | 1.384366482  | 4.95E-05 | up   | GRB10        | xp_005271821 |
| LOC107053964 | 9.061333716 | 31.06561357 | -1.777523231 | 5.06E-05 | down | LOC107053964 |              |

|              |             |             |              |          |      |              |              |
|--------------|-------------|-------------|--------------|----------|------|--------------|--------------|
| LOC101747384 | 84.10956195 | 34.07038402 | 1.303751613  | 5.08E-05 | up   | LOC101747384 |              |
| RASSF2       | 26.15478954 | 99.45556821 | -1.926976984 | 5.11E-05 | down | RASSF2       | RASSF2       |
| LOC107054098 | 12.07730317 | 40.23601966 | -1.736189253 | 5.16E-05 | down | LOC107054098 |              |
| BRAF         | 813.7767299 | 426.332565  | 0.932653769  | 5.17E-05 | up   | BRAF         | BRAF         |
| ATG14        | 128.7597543 | 242.2085615 | -0.911568134 | 5.19E-05 | down | ATG14        |              |
| CDYL         | 620.8148315 | 268.4491501 | 1.209514187  | 5.24E-05 | up   | CDYL         | CDYL         |
| LOC100859265 | 814.7013746 | 289.0020594 | 1.495191569  | 5.29E-05 | up   | LOC100859265 |              |
| EML1         | 372.9135875 | 230.9910109 | 0.691004655  | 5.37E-05 | up   | EML1         |              |
| AAR2         | 182.9681222 | 315.0236604 | -0.783867873 | 5.46E-05 | down | C20H200RF4   | xp_005260443 |
| USP47        | 3562.738368 | 1561.320167 | 1.190220133  | 5.70E-05 | up   | USP47        | USP47        |
| SUZ12        | 486.6408392 | 267.4987278 | 0.863325367  | 5.75E-05 | up   | SUZ12        | SUZ12        |
| GTF2H4       | 725.6135792 | 1247.973408 | -0.782313833 | 5.79E-05 | down | GTF2H4       | xp_005245279 |
| CLEC16A      | 420.3481341 | 144.6233132 | 1.539284537  | 6.42E-05 | up   | CLEC16A      | CLEC16A      |
| CEMIP        | 294.655613  | 155.6690398 | 0.920547706  | 6.52E-05 | up   | CEMIP        |              |
| LOC107056992 | 50.84822234 | 13.06342744 | 1.960663873  | 6.64E-05 | up   | LOC107056992 |              |
| TDH          | 90.91092862 | 34.46344803 | 1.399386686  | 6.66E-05 | up   | TDH          |              |
| KIAA1644     | 194.2934979 | 113.7508399 | 0.772360424  | 6.97E-05 | up   | KIAA1644     | KIAA1644     |
| CIT          | 69.75638641 | 136.4324599 | -0.967789719 | 7.07E-05 | down | CIT          | CIT          |
| LOC101747670 | 59.18830795 | 114.1586749 | -0.947656374 | 7.27E-05 | down | LOC101747670 |              |
| LRRC47       | 159.6929784 | 303.0031495 | -0.924031909 | 7.61E-05 | down | LRRC47       |              |
| CTDP1        | 486.8841059 | 257.3687744 | 0.919741378  | 7.90E-05 | up   | CTDP1        | CTDP1        |
| SETBP1       | 158.9476328 | 97.21892265 | 0.709242479  | 7.92E-05 | up   | SETBP1       | SETBP1       |
| STAM2        | 453.7963954 | 164.6764362 | 1.462411017  | 7.99E-05 | up   | STAM2        | STAM2        |
| XIAP         | 254.3780588 | 106.2440508 | 1.259592179  | 8.40E-05 | up   | XIAP         | XIAP         |
| CYP46A1      | 395.1107667 | 235.7401329 | 0.745059773  | 8.59E-05 | up   | CYP46A1      | CYP46A1      |
| GPR146       | 671.4176457 | 418.2340947 | 0.682899777  | 9.24E-05 | up   | GPR146       | GPR146       |
| LOC423740    | 37.79805249 | 95.25601631 | -1.333498312 | 9.28E-05 | down | LOC423740    | PRSS12       |
| CACUL1       | 539.6202698 | 306.9733078 | 0.813831327  | 9.43E-05 | up   | CACUL1       |              |
| LOC107054426 | 5.308484027 | 27.69006681 | -2.382996708 | 9.64E-05 | down | LOC107054426 |              |
| CDC34        | 406.0155275 | 227.4623521 | 0.835907122  | 9.97E-05 | up   | CDC34        | CDC34        |
| SLC05A1      | 132.5305795 | 243.6390318 | -0.878419998 | 1.00E-04 | down | SLC05A1      |              |
| LRP5         | 848.5666068 | 537.3804864 | 0.659083972  | 1.04E-04 | up   | LRP5         | LRP5         |
| LOC768814    | 85.34202777 | 0.839883236 | 6.666923807  | 1.04E-04 | up   | LOC768814    |              |
| ATP2B1       | 1964.508753 | 865.0877532 | 1.183250206  | 1.06E-04 | up   | ATP2B1       | xp_005268977 |
| EIF4EBP2     | 222.8118825 | 388.9791748 | -0.803866745 | 1.09E-04 | down | EIF4EBP2     |              |
| PBX4         | 87.85366149 | 159.8464397 | -0.863512291 | 1.11E-04 | down | PBX4         | PBX3         |
| LOC107055304 | 247.6302454 | 427.9466768 | -0.789243509 | 1.11E-04 | down | LOC107055304 |              |
| VWA2         | 64.52173605 | 138.0898709 | -1.097750337 | 1.11E-04 | down | VWA2         | VWA2         |
| FAM8A1       | 458.2330627 | 169.4462506 | 1.435253842  | 1.11E-04 | up   | FAM8A1       | FAM8A1       |
| GNPNAT1      | 1575.246505 | 613.2241168 | 1.361091267  | 1.13E-04 | up   | GNPNAT1      | GNPNAT1      |
| BICC1        | 3112.472787 | 1770.681657 | 0.813756364  | 1.14E-04 | up   | BICC1        | BICC1        |
| ARF1         | 4933.628095 | 1752.1332   | 1.493536512  | 1.18E-04 | up   | ARF1         | ARF1         |
| LOC107054899 | 13.89841818 | 59.83971922 | -2.106182711 | 1.25E-04 | down | LOC107054899 |              |
| RASL11B      | 148.1655953 | 293.270269  | -0.985020336 | 1.26E-04 | down | RASL11B      | RASL11B      |
| ARHGAP25     | 3.256194377 | 24.75576123 | -2.926505584 | 1.26E-04 | down | ARHGAP25     | ARHGAP25     |
| TRMT2A       | 208.862543  | 322.7620992 | -0.627917392 | 1.28E-04 | down | TRMT2A       | TRMT2A       |
| CRTC1        | 523.6710742 | 998.7556291 | -0.931470812 | 1.30E-04 | down | CRTC1        | CRTC1        |
| CAPRIN2      | 287.815975  | 487.5492101 | -0.760401172 | 1.35E-04 | down | CAPRIN2      |              |
| FOXP1        | 361.4459296 | 187.6176107 | 0.945984591  | 1.39E-04 | up   | FOXP1        |              |
| ADRB2        | 234.4126626 | 92.74644584 | 1.337686602  | 1.39E-04 | up   | ADRB2        |              |
| CABLES2      | 103.0575538 | 46.00907047 | 1.163460039  | 1.40E-04 | up   | CABLES2      |              |
| LOC107052380 | 72.3197668  | 210.9372557 | -1.544351996 | 1.40E-04 | down | LOC107052380 |              |
| KMT2E        | 812.6993694 | 1296.485948 | -0.67381289  | 1.41E-04 | down | KMT2E        | KMT2E        |
| ITGB1BP1     | 323.2035861 | 164.886354  | 0.970971199  | 1.42E-04 | up   | ITGB1BP1     | ITGB1BP1     |

|              |             |             |              |          |      |              |              |
|--------------|-------------|-------------|--------------|----------|------|--------------|--------------|
| ARPP21       | 84.69320307 | 164.1861576 | -0.955014402 | 1.43E-04 | down | ARPP21       | ARPP21       |
| LOC100858919 | 11.08823102 | 48.66473738 | -2.133847549 | 1.43E-04 | down | LOC100858919 |              |
| LOC427259    | 224.757639  | 59.17531664 | 1.925302725  | 1.44E-04 | up   | LOC427259    | RFK          |
| C120RF50     | 93.791596   | 37.76694776 | 1.312334466  | 1.46E-04 | up   | C120RF50     | C12orf50     |
| AHCY         | 954.251147  | 557.5363978 | 0.775303024  | 1.48E-04 | up   | AHCY         | xp_005260372 |
| KATNA1       | 188.285493  | 100.5115795 | 0.905560131  | 1.50E-04 | up   | KATNA1       | KATNA1       |
| BIN1         | 1353.173417 | 737.182622  | 0.876252774  | 1.51E-04 | up   | BIN1         | BIN1         |
| CBLB         | 1282.015499 | 825.1929686 | 0.635610271  | 1.52E-04 | up   | CBLB         | CBLB         |
| GTF3C1       | 478.0933648 | 809.5318639 | -0.759795484 | 1.53E-04 | down | GTF3C1       | GTF3C1       |
| LOC107052931 | 26.4442042  | 62.89141089 | -1.249911441 | 1.54E-04 | down | LOC107052931 |              |
| CHKA         | 1542.915111 | 869.2477811 | 0.827819304  | 1.59E-04 | up   | CHKA         | CHKA         |
| LOC107056761 | 118.5748063 | 45.66520568 | 1.376630275  | 1.69E-04 | up   | LOC107056761 |              |
| LOC107051653 | 70.04272082 | 23.5105246  | 1.574928395  | 1.70E-04 | up   | LOC107051653 |              |
| HSF2         | 964.6523974 | 576.9947098 | 0.741451084  | 1.73E-04 | up   | HSF2         | HSF2         |
| CHPF2        | 511.1460554 | 1078.049339 | -1.076615715 | 1.74E-04 | down | CHPF2        | xp_005250071 |
| LOC107051754 | 16.44020795 | 55.19506598 | -1.747310759 | 1.77E-04 | down | LOC107051754 |              |
| BACH1        | 3485.484854 | 1666.455611 | 1.064576469  | 1.77E-04 | up   | BACH1        | BACH1        |
| RNF169       | 54.91093063 | 207.5154836 | -1.918053718 | 1.88E-04 | down | RNF169       |              |
| LOC107057245 | 26.93953775 | 4.451156384 | 2.597473003  | 1.90E-04 | up   | LOC107057245 |              |
| C11ORF24     | 659.0910289 | 432.1625818 | 0.60890357   | 1.94E-04 | up   | C11ORF24     |              |
| CUL3         | 2422.020185 | 1136.897415 | 1.091108806  | 1.97E-04 | up   | CUL3         | CUL3         |
| LOC107053639 | 43.34238637 | 81.81787145 | -0.916637417 | 2.00E-04 | down | LOC107053639 |              |
| TRIM41       | 102.468516  | 311.035418  | -1.60189817  | 2.04E-04 | down | TRIM41       | TRIM41       |
| HIST1H2BF    | 92.87388908 | 23.04845525 | 2.010602987  | 2.09E-04 | up   | HIST1H2BF    |              |
| DGKB         | 1385.166813 | 645.2688688 | 1.102087399  | 2.11E-04 | up   | DGKB         | DGKB         |
| ZSWIM3       | 5.40845846  | 29.44271186 | -2.444621204 | 2.12E-04 | down | ZSWIM3       | ZSWIM3       |
| LOC107052504 | 55.17319445 | 99.34239881 | -0.848442071 | 2.13E-04 | down | LOC107052504 |              |
| ACSL1        | 1646.7078   | 757.6253429 | 1.120028083  | 2.19E-04 | up   | ACSL1        | ACSL1        |
| DUSP7        | 357.2578546 | 643.6901114 | -0.849400575 | 2.21E-04 | down | DUSP7        |              |
| ABCG1        | 130.1814198 | 52.31506265 | 1.315225259  | 2.27E-04 | up   | ABCG1        | ABCG1        |
| FBXL7        | 159.8565896 | 296.2388802 | -0.889982785 | 2.29E-04 | down | FBXL7        | FBXL7        |
| ATXN2        | 560.909408  | 896.2891376 | -0.676196431 | 2.32E-04 | down | ATXN2        |              |
| SUCO         | 737.6556605 | 454.3622799 | 0.699104449  | 2.32E-04 | up   | SUCO         |              |
| GALNT2       | 2687.920874 | 1169.480881 | 1.200622393  | 2.34E-04 | up   | GALNT2       |              |
| RPUSD2       | 93.14099164 | 220.9890109 | -1.246486483 | 2.39E-04 | down | RPUSD2       | RPUSD2       |
| SLC25A21     | 78.50379813 | 26.94679628 | 1.542648695  | 2.45E-04 | up   | SLC25A21     | SLC25A21     |
| TMPO         | 933.3441099 | 521.3127921 | 0.840259817  | 2.46E-04 | up   | TMPO         | TMPO         |
| PIP4K2A      | 596.8945454 | 299.5170417 | 0.994837979  | 2.55E-04 | up   | PIP4K2A      | PIP4K2A      |
| CRYGN        | 7.800947465 | 30.72713632 | -1.977792056 | 2.59E-04 | down | CRYGN        | CRYGN        |
| AUTS2        | 395.7013052 | 845.8020687 | -1.095908265 | 2.65E-04 | down | AUTS2        | AUTS2        |
| CHM          | 976.1951953 | 296.6241889 | 1.718533401  | 2.76E-04 | up   | CHM          | CHML         |
| SLC5A1       | 38.98809512 | 13.15555202 | 1.567361882  | 2.78E-04 | up   | SLC5A1       | SLC5A1       |
| C4H200RF194  | 2013.262424 | 1046.838944 | 0.943495735  | 2.82E-04 | up   | C4H200RF194  | C20orf194    |
| KIF5B        | 5034.871931 | 3221.677046 | 0.644143202  | 2.84E-04 | up   | KIF5B        | KIF5B        |
| GPR183       | 28.55151702 | 7.579586793 | 1.913376296  | 2.85E-04 | up   | GPR183       | GPR183       |
| LIMK2        | 1627.675908 | 3561.287562 | -1.129585465 | 2.85E-04 | down | LIMK2        | LIMK2        |
| BNC2         | 89.3380672  | 50.95935485 | 0.80992803   | 2.87E-04 | up   | BNC2         |              |
| LOC100858320 | 134.039504  | 45.39510581 | 1.562049584  | 2.94E-04 | up   | LOC100858320 |              |
| REEP3        | 3374.938018 | 1249.917477 | 1.43302816   | 3.02E-04 | up   | REEP3        | REEP3        |
| SLC22A3      | 92.39868778 | 41.85036951 | 1.142632002  | 3.02E-04 | up   | SLC22A3      | SLC22A3      |
| STARD3NL     | 174.3631408 | 88.22454009 | 0.982843187  | 3.05E-04 | up   | STARD3NL     | STARD3NL     |
| LOC107056562 | 295.2539743 | 143.9750429 | 1.036137728  | 3.08E-04 | up   | LOC107056562 |              |
| GTPBP1       | 419.0390371 | 995.025027  | -1.247648163 | 3.09E-04 | down | GTPBP1       | GTPBP1       |
| GNAI1        | 775.5922435 | 377.4380733 | 1.039058416  | 3.13E-04 | up   | GNAI1        | GNAI1        |

|              |             |             |              |          |      |              |              |
|--------------|-------------|-------------|--------------|----------|------|--------------|--------------|
| TSC22D1      | 640.4350991 | 1076.963996 | -0.749845738 | 3.22E-04 | down | TSC22D1      | TSC22D1      |
| LOC101748144 | 132.9239069 | 203.7959232 | -0.61652459  | 3.25E-04 | down | LOC101748144 |              |
| GPR21        | 103.3268362 | 165.6081005 | -0.680558241 | 3.29E-04 | down | GPR21        | GPR21        |
| FAM19A5      | 92.83682987 | 42.5705208  | 1.12484252   | 3.38E-04 | up   | FAM19A5      |              |
| TPGS2        | 230.945449  | 128.8750799 | 0.841578795  | 3.39E-04 | up   | TPGS2        |              |
| LOC101749321 | 8.154572173 | 28.8246156  | -1.821620275 | 3.47E-04 | down | LOC101749321 |              |
| PPP3CA       | 512.0743306 | 289.6988706 | 0.821799181  | 3.48E-04 | up   | PPP3CA       | PPP3CB       |
| TTF2         | 58.53227997 | 123.6498134 | -1.078955682 | 3.54E-04 | down | TTF2         | TTF2         |
| FITM2        | 188.0236659 | 107.0241085 | 0.812978443  | 3.62E-04 | up   | FITM2        | FITM2        |
| LOC418927    | 505.3697061 | 240.2571678 | 1.072759713  | 3.65E-04 | up   | LOC418927    | POLR1D       |
| ACSS2        | 101.241114  | 182.7512253 | -0.852085792 | 3.68E-04 | down | ACSS2        |              |
| SNX10        | 298.5826652 | 106.3316872 | 1.48955882   | 3.71E-04 | up   | SNX10        | SNX10        |
| BAIAP2L1     | 904.5473772 | 360.0329345 | 1.329067184  | 3.72E-04 | up   | BAIAP2L1     | BAIAP2L1     |
| LIN7B        | 909.9793483 | 380.053806  | 1.259630122  | 3.73E-04 | up   | LIN7B        | LIN7C        |
| LOC107051508 | 48.66721246 | 93.48963543 | -0.941856289 | 3.81E-04 | down | LOC107051508 |              |
| ETF1         | 3856.531652 | 1732.071702 | 1.154805298  | 3.83E-04 | up   | ETF1         | ETF1         |
| SLM01        | 546.4114242 | 202.2945982 | 1.433529851  | 3.89E-04 | up   | SLM01        | PRELID3B     |
| CAMKK1       | 170.1388916 | 107.3374052 | 0.664560043  | 3.93E-04 | up   | CAMKK1       | CAMKK1       |
| MAG11        | 1135.877715 | 2254.352484 | -0.988905581 | 3.94E-04 | down | MAG11        |              |
| ST3GAL5      | 290.8189405 | 97.83362485 | 1.571718931  | 4.07E-04 | up   | ST3GAL5      | ST3GAL5      |
| RDH10        | 456.2185807 | 237.210253  | 0.943558836  | 4.11E-04 | up   | RDH10        | RDH10        |
| FAM84B       | 295.912034  | 192.3471343 | 0.621456033  | 4.11E-04 | up   | FAM84B       | FAM84B       |
| LOC107054512 | 102.0751885 | 34.14022091 | 1.580087934  | 4.12E-04 | up   | LOC107054512 |              |
| KCNMA1       | 77.19187877 | 38.73042311 | 0.99498181   | 4.13E-04 | up   | KCNMA1       | KCNMA1       |
| IRAK2        | 2220.580184 | 1323.055337 | 0.747063263  | 4.14E-04 | up   | IRAK2        | IRAK2        |
| AFG3L2       | 1389.649911 | 821.1818391 | 0.758947849  | 4.14E-04 | up   | AFG3L2       | AFG3L2       |
| RUNX1        | 989.8671833 | 561.891617  | 0.816943086  | 4.15E-04 | up   | RUNX1        | RUNX1        |
| MIR103A1     | 28.31275045 | 5.942117705 | 2.252402819  | 4.21E-04 | up   | MIR103-1     |              |
| SPSB3        | 73.99260265 | 130.2854554 | -0.816223085 | 4.27E-04 | down | SPSB3        | SPSB3        |
| PLA2G4A      | 1157.095099 | 519.197244  | 1.156152811  | 4.44E-04 | up   | PLA2G4A      | PLA2G4A      |
| SEPT2        | 1855.158903 | 741.0042398 | 1.323989063  | 4.47E-04 | up   | LOC416777    | SEPT2        |
| CCDC92       | 341.2989546 | 209.1838642 | 0.706264424  | 4.50E-04 | up   | CCDC92       | CCDC92       |
| CIH21ORF59   | 132.2456765 | 73.04826277 | 0.856298688  | 4.52E-04 | up   | CIH21ORF59   | C21orf59     |
| FAM107A      | 48.41912241 | 219.557956  | -2.180952978 | 4.54E-04 | down | FAM107A      | xp_005264890 |
| RAB28        | 164.2908327 | 58.40015419 | 1.492207898  | 4.58E-04 | up   | RAB28        | RAB28        |
| P2RY11       | 31.05303073 | 138.4501566 | -2.1565607   | 4.60E-04 | down | P2RY11       |              |
| ITGA2        | 723.4063939 | 257.8543743 | 1.488249829  | 4.63E-04 | up   | ITGA2        | ITGA2        |
| DDX10        | 779.0873526 | 484.4726134 | 0.68536998   | 4.65E-04 | up   | DDX10        | DDX10        |
| UBE3C        | 810.9162332 | 395.3475372 | 1.036431456  | 4.79E-04 | up   | UBE3C        | UBE3C        |
| TMEM38B      | 168.589664  | 73.73232269 | 1.193146979  | 4.94E-04 | up   | TMEM38B      | TMEM38B      |
| MIPOL1       | 407.4475536 | 249.6802308 | 0.706532773  | 5.06E-04 | up   | MIPOL1       | MIPOL1       |
| LOC107050372 | 37.38310751 | 0           | 20           | 5.14E-04 | up   | LOC107050372 |              |
| TMX4         | 888.3751453 | 489.8760891 | 0.858752155  | 5.26E-04 | up   | TMX4         | TMX4         |
| DST          | 3920.606103 | 2600.912723 | 0.592058715  | 5.56E-04 | up   | DST          | DST          |
| UXS1         | 731.6768343 | 335.9961668 | 1.122761808  | 5.62E-04 | up   | UXS1         | UXS1         |
| MIR92A1      | 0.317723722 | 10.29893937 | -5.018579151 | 5.63E-04 | down | MIR92A1      |              |
| MAL2         | 414.4432108 | 266.6475225 | 0.636240506  | 5.86E-04 | up   | MAL2         | MAL2         |
| TMEM180      | 475.0766469 | 719.8106054 | -0.599457068 | 6.12E-04 | down | TMEM180      | xp_005270211 |
| ERI2         | 22.46309658 | 50.37286184 | -1.165089877 | 6.12E-04 | down | ERI2         | ERI2         |
| FGF2         | 307.711901  | 199.3948827 | 0.625951857  | 6.19E-04 | up   | FGF2         | xp_005262893 |
| ELMSAN1      | 769.3302535 | 451.0418121 | 0.770341863  | 6.21E-04 | up   | C5H14ORF43   | ELMSAN1      |
| CHST9        | 180.5653978 | 109.590883  | 0.720393668  | 6.49E-04 | up   | CHST9        | CHST9        |
| TMEM71       | 41.90876535 | 14.080658   | 1.573537266  | 6.52E-04 | up   | TMEM71       |              |
| EIF4E2       | 497.1458504 | 824.8466425 | -0.73045675  | 6.57E-04 | down | EIF4E2       | xp_005247030 |

|              |             |             |              |             |      |              |              |
|--------------|-------------|-------------|--------------|-------------|------|--------------|--------------|
| TMEM260      | 83.94435585 | 142.3237832 | -0.761671534 | 6.65E-04    | down | C5H14ORF101  | TMEM260      |
| HIST1H46L4   | 99.78370713 | 26.97826381 | 1.887006762  | 6.72E-04    | up   | HIST1H46L4   | xp_005277469 |
| SEPP1        | 74.09986887 | 119.5035376 | -0.689510431 | 6.74E-04    | down | SEPP1        | SEPP1        |
| MSH6         | 158.5686042 | 381.8735683 | -1.267987913 | 6.78E-04    | down | MSH6         |              |
| WISP1        | 654.7298672 | 1216.592292 | -0.893874071 | 6.85E-04    | down | WISP1        | WISP1        |
| ACADS        | 231.8260967 | 425.1364644 | -0.874883026 | 6.90E-04    | down | ACADS        | ACADS        |
| KL           | 120.9696271 | 218.5186455 | -0.853111523 | 6.91E-04    | down | KL           | KL           |
| UBE3A        | 1459.601063 | 775.1880908 | 0.912955795  | 7.04E-04    | up   | UBE3A        | UBE3A        |
| MGAT3        | 204.3869484 | 121.3276017 | 0.752395276  | 7.09E-04    | up   | MGAT3        | MGAT3        |
| TBC1D5       | 672.90482   | 337.6175166 | 0.995012698  | 7.10E-04    | up   | TBC1D5       |              |
| LOC101747432 | 2.176198073 | 25.28559306 | -3.538433837 | 7.12E-04    | down | LOC101747432 |              |
| GPR137C      | 70.64402577 | 166.6116083 | -1.237849456 | 7.38E-04    | down | GPR137C      |              |
| LPGAT1       | 1651.398885 | 754.4019034 | 1.130283415  | 7.38E-04    | up   | LPGAT1       | LPGAT1       |
| MAMLD1       | 183.6831002 | 561.7266822 | -1.612649436 | 7.43E-04    | down | MAMLD1       | xp_005278219 |
| LOC107056747 | 113.7843931 | 24.27195123 | 2.228940691  | 7.44E-04    | up   | LOC107056747 |              |
| CDC42EP3     | 2150.283524 | 1057.574427 | 1.023767701  | 7.80E-04    | up   | CDC42EP3     | CDC42EP3     |
| LOC107056127 | 943.8962465 | 394.4594465 | 1.258751299  | 7.96E-04    | up   | LOC107056127 |              |
| TXNRD3       | 1855.489939 | 768.4053982 | 1.271860619  | 8.08E-04    | up   | TXNRD3       | TXNRD3       |
| BCL10        | 792.7157245 | 407.7314393 | 0.95918439   | 8.09E-04    | up   | BCL10        | BCL10        |
| IFNGR1       | 300.6139376 | 94.66593874 | 1.666994564  | 8.28E-04    | up   | IFNGR1       | IFNGR1       |
| APPL1        | 677.5433755 | 349.6786071 | 0.954283773  | 8.33E-04    | up   | APPL1        | APPL1        |
| TNFSF15      | 143.2349431 | 76.64042563 | 0.902206012  | 8.42E-04    | up   | TNFSF15      | TNFSF15      |
| DNAJC27      | 41.85520054 | 99.36730378 | -1.24736433  | 8.53E-04    | down | DNAJC27      | DNAJC27      |
| ESRRG        | 124.9813872 | 67.22422699 | 0.894660092  | 8.60E-04    | up   | ESRRG        | ESRRG        |
| TGIF2        | 87.43785843 | 341.5424852 | -1.965735078 | 8.65E-04    | down | TGIF2        | TGIF2        |
| COMMD10      | 142.1438648 | 67.55206488 | 1.073280057  | 8.67E-04    | up   | COMMD10      | COMMD10      |
| RNF128       | 500.6975699 | 321.0204917 | 0.641274062  | 8.76E-04    | up   | RNF128       | RNF128       |
| YDJC         | 35.32514797 | 79.6059273  | -1.172180251 | 8.88E-04    | down | YDJC         | YDJC         |
| SESN3        | 71.15715975 | 29.01569875 | 1.294175254  | 9.05E-04    | up   | SESN3        | SESN1        |
| DDRKG1       | 1670.538189 | 913.882878  | 0.870231775  | 9.18E-04    | up   | DDRKG1       |              |
| TBC1D2       | 158.2580357 | 246.127689  | -0.637128213 | 9.20E-04    | down | TBC1D2       | TBC1D2       |
| STAM         | 643.4436094 | 257.9202154 | 1.318888864  | 9.38E-04    | up   | STAM         | STAM2        |
| ARHGAP10     | 548.294858  | 291.2896769 | 0.91249737   | 9.48E-04    | up   | ARHGAP10     | ARHGAP10     |
| LOC107056445 | 95.18056588 | 35.14655375 | 1.437283797  | 9.51E-04    | up   | LOC107056445 |              |
| ACAP2        | 518.7700106 | 268.5267204 | 0.950029428  | 9.52E-04    | up   | ACAP2        | ACAP2        |
| CCDC71L      | 25.93893534 | 119.8797693 | -2.208397041 | 9.62E-04    | down | CCDC71L      |              |
| TIGD5        | 16.88475681 | 100.2715816 | -2.570119477 | 9.66E-04    | down | TIGD5        |              |
| MNR2         | 3.141336235 | 23.83920712 | -2.923885977 | 9.83E-04    | down | MNR2         | MXN1         |
| SAP30L       | 709.6455    | 342.0372055 | 1.052945249  | 0.001001262 | up   | SAP30L       | SAP30L       |
| PNISR        | 642.6684501 | 1177.55617  | -0.873649324 | 0.001001397 | down | PNISR        | PNISR        |
| SOCS4        | 54.03204141 | 106.8256443 | -0.983370923 | 0.001014958 | down | SOCS4        | SOCS4        |
| TYW1         | 80.87306309 | 345.1672359 | -2.093564367 | 0.001027772 | down | TYW1         |              |
| LOC107055768 | 2.734146718 | 18.64864037 | -2.769907883 | 0.00104629  | down | LOC107055768 |              |
| NR1D2        | 130.9794568 | 81.37781835 | 0.686633044  | 0.00105722  | up   | NR1D2        | NR1D2        |
| LOC107054104 | 14.68899982 | 1.262136778 | 3.540795997  | 0.001059649 | up   | LOC107054104 |              |
| LMBR1        | 177.5046406 | 80.0656508  | 1.148601397  | 0.001059972 | up   | LMBR1        | xp_005249611 |
| LMF1         | 153.3968806 | 290.8224627 | -0.92286956  | 0.001061451 | down | LMF1         | LMF2         |
| JAM3         | 1160.463503 | 707.3101774 | 0.714286224  | 0.001063377 | up   | JAM3         | JAM3         |
| UPP1         | 104.2309542 | 47.48857396 | 1.13413145   | 0.001069085 | up   | UPP1         | xp_005249894 |
| C19H170RF85  | 258.9232486 | 122.4851078 | 1.079918158  | 0.001081275 | up   | C19H170RF85  | NCBP3        |
| PIGW         | 47.69288742 | 91.33158221 | -0.937339698 | 0.001086554 | down | PIGW         | xp_005276951 |
| CSF2RB       | 3.005460816 | 15.79037769 | -2.393387563 | 0.001102311 | down | CSF2RB       | CSF2RB       |
| BLK          | 6.46597913  | 22.33216412 | -1.788182308 | 0.001112097 | down | BLK          | BLK          |
| TPST1        | 447.5622297 | 271.8067444 | 0.719507036  | 0.001123077 | up   | TPST1        | TPST1        |

|              |             |             |              |             |      |              |              |
|--------------|-------------|-------------|--------------|-------------|------|--------------|--------------|
| ZNF821       | 314.8928466 | 722.6617715 | -1.198459594 | 0.001146355 | down | ZNF821       | xp_005256091 |
| NSMCE4A      | 381.6604259 | 216.9934881 | 0.814637854  | 0.001148133 | up   | NSMCE4A      | NSMCE4A      |
| TMEM86A      | 175.2985    | 90.54973874 | 0.953031268  | 0.001165617 | up   | TMEM86A      | TMEM86A      |
| ANAPC10      | 99.32352614 | 36.1409365  | 1.45850159   | 0.001167335 | up   | ANAPC10      | ANAPC10      |
| CCPG1        | 1478.761186 | 673.5852951 | 1.134456534  | 0.00116871  | up   | CCPG1        | CCPG1        |
| PIDD1        | 39.92346587 | 102.2967272 | -1.357451113 | 0.001183326 | down | PIDD1        |              |
| ORMDL3       | 453.3022624 | 769.901566  | -0.764200643 | 0.001186134 | down | ORMDL3       | ORMDL3       |
| CYB5D2       | 75.70615131 | 171.5142756 | -1.179846229 | 0.001214116 | down | CYB5D2       | CYB5D2       |
| TRIM32       | 154.0998916 | 257.5772458 | -0.741139306 | 0.001239396 | down | TRIM32       |              |
| NSD1         | 543.3025066 | 1551.762895 | -1.514080527 | 0.001254249 | down | NSD1         |              |
| NOP14        | 707.5073443 | 428.6251717 | 0.723028547  | 0.001266899 | up   | NOP14        | NOP14        |
| FANCM        | 294.2968533 | 982.6197962 | -1.739361188 | 0.001271643 | down | FANCM        |              |
| MCU          | 543.5165869 | 335.4478526 | 0.696235555  | 0.001286738 | up   | MCU          | MCU          |
| MRPS7        | 312.9328144 | 535.5117028 | -0.775065155 | 0.001288714 | down | MRPS7        | MRPS7        |
| CAMK1D       | 284.5326183 | 174.9387371 | 0.701744266  | 0.001290686 | up   | CAMK1D       | CAMK1D       |
| ACBD6        | 144.0710879 | 252.2812389 | -0.808252078 | 0.001329515 | down | ACBD6        | ACBD6        |
| ALDH6A1      | 174.2046532 | 101.904278  | 0.773568542  | 0.001329745 | up   | ALDH6A1      | ALDH6A1      |
| LRRC41       | 165.3593256 | 276.9354243 | -0.743945198 | 0.001336122 | down | LRRC41       | LRRC41       |
| SRBD1        | 330.6041876 | 155.1591367 | 1.091356345  | 0.001356376 | up   | SRBD1        | SRBD1        |
| TMEM204      | 61.08268329 | 106.243368  | -0.798537443 | 0.001411302 | down | TMEM204      | TMEM204      |
| ARHGAP12     | 950.8697339 | 346.0954753 | 1.45807763   | 0.001423722 | up   | ARHGAP12     |              |
| FARP2        | 226.1251318 | 358.7282002 | -0.665769819 | 0.001459485 | down | FARP2        | FARP2        |
| PLA2G4B      | 120.4529761 | 54.194532   | 1.152250838  | 0.001495183 | up   | PLA2G4B      |              |
| ZFP36L1      | 4187.370369 | 1746.124825 | 1.261887832  | 0.001496629 | up   | ZFP36L1      |              |
| FYTTD1       | 1944.393506 | 1083.409456 | 0.843741633  | 0.001512447 | up   | FYTTD1       | FYTTD1       |
| NLRP3        | 24.99291936 | 130.3900051 | -2.383241951 | 0.001518528 | down | NLRP3        |              |
| CD3E         | 140.0631295 | 211.3316174 | -0.593431397 | 0.001531749 | down | CD3E         | CD3E         |
| LOC107054268 | 25.70308549 | 5.670367807 | 2.180427333  | 0.001569917 | up   | LOC107054268 |              |
| GNL2         | 1048.086744 | 578.5092784 | 0.857346122  | 0.001630235 | up   | GNL2         |              |
| CEP85        | 60.2569106  | 184.3743436 | -1.613439301 | 0.001670274 | down | CEP85        | CEP85        |
| ACTR5        | 112.2270387 | 207.3658663 | -0.885758132 | 0.0016833   | down | ACTR5        | ACTR5        |
| WAC          | 1300.272709 | 812.4906192 | 0.678391173  | 0.001692118 | up   | WAC          |              |
| STX11        | 59.59417571 | 11.81281635 | 2.334818373  | 0.001693993 | up   | STX11        | xp_005267245 |
| CALCOCO2     | 934.8561263 | 612.5245328 | 0.609976724  | 0.001717004 | up   | CALCOCO2     | xp_005256988 |
| TTI1         | 99.95401363 | 270.8176902 | -1.437985576 | 0.001718803 | down | TTI1         | TTI1         |
| TMEM255A     | 477.7979531 | 285.8067356 | 0.741360757  | 0.001745309 | up   | TMEM255A     |              |
| LOC415787    | 42.33521365 | 15.983043   | 1.405316062  | 0.001754655 | up   | LOC415787    | CES1         |
| TRIB2        | 1337.059991 | 563.410503  | 1.246805834  | 0.001763507 | up   | TRIB2        | TRIB2        |
| STK17B       | 409.1868063 | 210.2033597 | 0.960973899  | 0.001814636 | up   | STK17B       | STK17B       |
| NADK         | 803.9131592 | 345.4117416 | 1.218722541  | 0.001822099 | up   | NADK         | NADK         |
| CEP250       | 78.30675444 | 346.8269926 | -2.147007525 | 0.001823251 | down | CEP250       | CEP250       |
| GPR75        | 27.38818848 | 62.77851293 | -1.196717009 | 0.001844625 | down | GPR75        | GPR75        |
| IL4R         | 927.3247767 | 562.4439645 | 0.721365332  | 0.001868637 | up   | IL4R         | IL4R         |
| TRAF2        | 346.5422338 | 851.0685516 | -1.296244155 | 0.001873441 | down | TRAF2        |              |
| LOC107051299 | 17.21444753 | 47.15079254 | -1.45366214  | 0.001874991 | down | LOC107051299 |              |
| RGS17        | 37.1373493  | 7.500637923 | 2.30778564   | 0.001878134 | up   | RGS17        | RGS17        |
| PRSS12       | 41.70735813 | 75.55011292 | -0.857131981 | 0.001891749 | down | PRSS12       | PRSS12       |
| DDAH1        | 688.2417364 | 445.4427913 | 0.627675226  | 0.001917051 | up   | DDAH1        | DDAH1        |
| C1QC         | 44.88751207 | 131.3097914 | -1.548588457 | 0.001941596 | down | C1QC         | xp_005246040 |
| SLM02        | 4816.869742 | 2554.058276 | 0.915304467  | 0.001965537 | up   | SLM02        | PRELID3B     |
| LOC107054414 | 14.20854998 | 1.594543732 | 3.15554376   | 0.0019893   | up   | LOC107054414 |              |
| ST3GAL1      | 851.4388204 | 417.4552971 | 1.028281154  | 0.002001498 | up   | ST3GAL1      | ST3GAL1      |
| ERC1         | 4282.330871 | 2836.319018 | 0.594376459  | 0.002040408 | up   | ERC1         | ERC1         |
| ST3GAL3      | 132.6252938 | 311.518125  | -1.231960159 | 0.002047551 | down | ST3GAL3      | ST3GAL3      |



|                |             |             |              |             |      |                |              |
|----------------|-------------|-------------|--------------|-------------|------|----------------|--------------|
| LACC1          | 83.4574723  | 21.81765028 | 1.935545492  | 0.002051036 | up   | LACC1          | LACC1        |
| NKIRAS1        | 42.35433583 | 12.89304982 | 1.715916096  | 0.002056895 | up   | NKIRAS1        | NKIRAS1      |
| KCTD15         | 85.11060109 | 164.1767611 | -0.947839186 | 0.002093767 | down | KCTD15         | xp_005259301 |
| MIER2          | 139.5787414 | 443.6607073 | -1.668377559 | 0.002132965 | down | MIER2          | MIER2        |
| UBN1           | 270.7076355 | 450.5218649 | -0.734861545 | 0.002150784 | down | UBN1           | UBN1         |
| LOC107056966   | 41.9729754  | 9.193512249 | 2.190772704  | 0.002179774 | up   | LOC107056966   |              |
| LOC107049080   | 1.451284835 | 91.56913355 | -5.97945877  | 0.002185409 | down | LOC107049080   |              |
| MTCH1          | 51.75630564 | 116.7883166 | -1.174089409 | 0.002199342 | down | MTCH1          | MTCH1        |
| GLI2           | 222.7599396 | 469.2156235 | -1.074761245 | 0.002209847 | down | GLI2           | xp_005263697 |
| RBM26          | 805.6188312 | 455.7243842 | 0.82193584   | 0.002242705 | up   | RBM26          | RBM26        |
| LOC107057295   | 33.18763099 | 156.3443401 | -2.236009437 | 0.002319757 | down | LOC107057295   |              |
| RNGTT          | 464.9782211 | 277.8546546 | 0.742832735  | 0.00232283  | up   | RNGTT          | RNGTT        |
| ZEB1           | 226.1074795 | 138.7406096 | 0.704618587  | 0.002330025 | up   | ZEB1           | ZEB1         |
| SDR16C5        | 653.5602416 | 224.5550718 | 1.541250915  | 0.002339477 | up   | SDR16C5        | SDR16C5      |
| TLR1B          | 44.72143249 | 100.8795307 | -1.173595164 | 0.002363891 | down | TLR1B          |              |
| ZNF277         | 260.8409577 | 89.28372873 | 1.546701237  | 0.002375305 | up   | ZNF277         | ZNF277       |
| WEE1           | 581.5726647 | 928.8978897 | -0.675560554 | 0.002404513 | down | WEE1           | WEE1         |
| EFTUD2         | 1615.565434 | 3051.622067 | -0.917537117 | 0.002412421 | down | EFTUD2         | EFTUD2       |
| LOC107050147   | 2.734146718 | 23.47533264 | -3.101983033 | 0.002475261 | down | LOC107050147   |              |
| SPAST          | 958.1832284 | 557.4344148 | 0.781499487  | 0.002528991 | up   | SPAST          | SPAST        |
| FAM107B        | 1656.712231 | 928.04931   | 0.836049662  | 0.002598061 | up   | FAM107B        | FAM107B      |
| RP11-574K11.31 | 205.6956779 | 338.6744189 | -0.71938754  | 0.002604505 | down | RP11-574K11.31 |              |
| PLD6           | 40.04459417 | 81.73050644 | -1.029267175 | 0.00262415  | down | PLD6           | FLCN         |
| KDM4C          | 217.8486944 | 115.0414025 | 0.921173297  | 0.002628743 | up   | KDM4C          | KDM4C        |
| LOC107054816   | 172.3833631 | 52.32064069 | 1.720168432  | 0.00264828  | up   | LOC107054816   |              |
| LOC416357      | 48.01250623 | 87.7491593  | -0.869975057 | 0.00270124  | down | LOC416357      |              |
| TNFRSF18       | 44.25395972 | 14.29409669 | 1.630387096  | 0.002701271 | up   | TNFRSF18       | TNFRSF18     |
| LOC107053428   | 124.2107742 | 59.78499674 | 1.054934935  | 0.002706503 | up   | LOC107053428   |              |
| FAF1           | 595.0290525 | 359.9756756 | 0.725060686  | 0.002711898 | up   | FAF1           |              |
| MTMR6          | 888.205264  | 418.7251672 | 1.084889488  | 0.002724625 | up   | MTMR6          | MTMR6        |
| GNA13          | 1128.981517 | 488.0413637 | 1.209946534  | 0.002739314 | up   | GNA13          | GNA13        |
| LOC428754      | 25.80451828 | 8.172353674 | 1.658800153  | 0.002776846 | up   | LOC428754      | HSD17B11     |
| BCL2L11        | 88.5341968  | 335.4111004 | -1.921623719 | 0.00283424  | down | BCL2L11        |              |
| SCN8A          | 68.06195993 | 132.4197614 | -0.960197835 | 0.002836352 | down | SCN8A          | SCN8A        |
| FAM102B        | 305.664833  | 145.2962545 | 1.072953065  | 0.002843584 | up   | FAM102B        | xp_005270829 |
| IGFALS         | 1.846507356 | 15.73199863 | -3.090831051 | 0.002899359 | down | IGFALS         | IGFALS       |
| YLPM1          | 554.8838759 | 863.6812385 | -0.63831307  | 0.002922844 | down | YLPM1          |              |
| LOC107050010   | 8.13209654  | 26.85018357 | -1.723232705 | 0.00293417  | down | LOC107050010   |              |
| ARHGEF4        | 158.3435747 | 428.4040216 | -1.435913697 | 0.00293571  | down | ARHGEF4        | ARHGEF4      |
| C3ORF33        | 20.37009414 | 61.31750483 | -1.589846344 | 0.00300256  | down | C3ORF33        |              |
| FAM214B        | 0.941204171 | 19.25577104 | -4.354639369 | 0.003004562 | down | FAM214B        | FAM214B      |
| LIFR           | 178.1402246 | 108.4727724 | 0.715680359  | 0.00301504  | up   | LIFR           | xp_005248360 |
| SRRL           | 90.09654959 | 49.18297566 | 0.873312833  | 0.003030835 | up   | SRRL           |              |
| LOC107054364   | 0.317723722 | 13.9309859  | -5.454380743 | 0.003041924 | down | LOC107054364   |              |
| MIR1306        | 21.47402443 | 58.22281994 | -1.438992125 | 0.003053052 | down | MIR1306        |              |
| CLMN           | 548.9272252 | 277.8572213 | 0.982271159  | 0.003086537 | up   | CLMN           | CLMN         |
| INTS12         | 375.4979813 | 183.4817445 | 1.033168623  | 0.003088919 | up   | INTS12         | INTS12       |
| LOC770141      | 74.53142912 | 206.1305773 | -1.467637701 | 0.003103076 | down | LOC770141      |              |
| LOC420030      | 2.493921795 | 39.97586331 | -4.002641059 | 0.003151006 | down | LOC420030      | LOC100507656 |
| CELF1          | 1002.70364  | 528.2348537 | 0.924643864  | 0.003164757 | up   | CELF1          | CELF1        |
| C17ORF80       | 66.64525433 | 140.5737006 | -1.076752659 | 0.003262509 | down | C17ORF80       | ATP5J2       |
| FRMPD1         | 3.105435249 | 19.03784422 | -2.61600273  | 0.003271412 | down | FRMPD1         | FRMPD1       |
| ITGB8          | 120.9401329 | 65.20583448 | 0.891220105  | 0.003307585 | up   | ITGB8          | ITGB8        |
| LOC107052611   | 57.2254841  | 31.12241047 | 0.878703959  | 0.003367308 | up   | LOC107052611   |              |

|              |             |             |              |             |      |              |              |
|--------------|-------------|-------------|--------------|-------------|------|--------------|--------------|
| FER1L4       | 804.528357  | 1802.492799 | -1.163778318 | 0.003395961 | down | FER1L4       |              |
| KLHL3        | 118.7656933 | 197.3040997 | -0.732302775 | 0.003413335 | down | KLHL3        |              |
| CRYBA4       | 38.53960793 | 291.6040985 | -2.919597197 | 0.003418883 | down | CRYBA4       | CRYBA4       |
| LOC107051184 | 16.79383266 | 1.711233998 | 3.294822562  | 0.003509692 | up   | LOC107051184 |              |
| LOC422264    | 729.1288282 | 366.8773579 | 0.990875873  | 0.003524835 | up   | LOC422264    | PCDH11X      |
| AEBP2        | 169.9167672 | 88.71863708 | 0.937519116  | 0.003530214 | up   | AEBP2        | AEBP2        |
| HBG2         | 0.522047659 | 22.12411296 | -5.405294283 | 0.003551757 | down | HBG2         | HBE1         |
| EME1         | 53.60908316 | 158.8478402 | -1.567096108 | 0.003555897 | down | EME1         | EME1         |
| LOC107057413 | 1.145528108 | 31.42618801 | -4.77788252  | 0.00358393  | down | LOC107057413 |              |
| RCAN3        | 1186.292596 | 544.6063613 | 1.123174151  | 0.003598346 | up   | RCAN3        | RCAN3        |
| LOC100857473 | 11.06005856 | 0.871350762 | 3.665961622  | 0.00368939  | up   | LOC100857473 |              |
| CBS          | 646.1414222 | 424.8037093 | 0.605053601  | 0.00373197  | up   | CBS          | CBS          |
| RBM17        | 1546.976407 | 613.2639891 | 1.334871051  | 0.003739045 | up   | RBM17        | RBM17        |
| KLHL14       | 49.09382429 | 109.7097286 | -1.160078005 | 0.003752171 | down | KLHL14       | KLHL14       |
| PDPR         | 600.0645928 | 1625.052119 | -1.437296279 | 0.003775125 | down | PDPR         |              |
| TBL1XR1      | 748.3898032 | 428.7148998 | 0.803771344  | 0.003802746 | up   | TBL1XR1      | TBL1XR1      |
| STRN3        | 1098.669145 | 584.5177925 | 0.91043815   | 0.003812753 | up   | STRN3        |              |
| LOC107054983 | 0.635447444 | 45.36075846 | -6.157528144 | 0.003835593 | down | LOC107054983 |              |
| C2ORF88      | 291.9100611 | 645.2365286 | -1.144304179 | 0.003869584 | down | C2ORF88      |              |
| CTBP1        | 2537.442321 | 1522.61923  | 0.736819824  | 0.00389663  | up   | CTBP1        | CTBP1        |
| LOC107056588 | 67.08424296 | 16.30392427 | 2.040754684  | 0.003906079 | up   | LOC107056588 |              |
| MARCO        | 44.20900845 | 198.9148739 | -2.169738876 | 0.003910009 | down | MARCO        | MARCO        |
| P2RY6        | 5.738149177 | 40.96618233 | -2.835776073 | 0.003945715 | down | P2RY6        | P2RY6        |
| LOC107055675 | 1660.600065 | 61.58621304 | 4.75295343   | 0.00397407  | up   | LOC107055675 |              |
| SHOC2        | 516.9883251 | 265.2499286 | 0.962779338  | 0.003997763 | up   | SHOC2        | xp_005270243 |
| ZFYVE26      | 617.6412517 | 334.3006204 | 0.88562308   | 0.004055782 | up   | ZFYVE26      | ZFYVE26      |
| OSGIN2       | 128.1508959 | 57.818913   | 1.148230173  | 0.004078371 | up   | OSGIN2       |              |
| SUGP1        | 192.2587239 | 403.4545599 | -1.069357132 | 0.004106155 | down | SUGP1        | SUGP1        |
| MPEG1        | 11.91311869 | 114.5151005 | -3.264914806 | 0.004182167 | down | MPEG1        | MPEG1        |
| LOC101751485 | 2.404456001 | 14.00923894 | -2.542596151 | 0.004201413 | down | LOC101751485 |              |
| LOC769676    | 1898.64265  | 1053.055978 | 0.850386268  | 0.004211875 | up   | LOC769676    | xp_005267079 |
| MAP3K14      | 591.1113988 | 2027.507023 | -1.778204965 | 0.004246584 | down | MAP3K14      | MAP3K14      |
| SLC44A1      | 1033.41286  | 644.4621971 | 0.681249102  | 0.004297564 | up   | SLC44A1      | SLC44A1      |
| LOC107056461 | 175.0321343 | 51.34798552 | 1.769240229  | 0.004329258 | up   | LOC107056461 |              |
| MIR1725      | 2.493921795 | 17.62906396 | -2.821467744 | 0.004356805 | down | MIR1725      |              |
| PDZD8        | 446.5092476 | 296.2543381 | 0.591853776  | 0.00442257  | up   | PDZD8        | PDZD8        |
| PEX6         | 264.295073  | 669.9978809 | -1.342007002 | 0.00444829  | down | PEX6         |              |
| LOC107051523 | 4.298831338 | 128.8108603 | -4.905165916 | 0.004527204 | down | LOC107051523 |              |
| ABL2         | 651.3287548 | 1656.035531 | -1.346275802 | 0.004538353 | down | ABL2         | ABL2         |
| PXK          | 158.7736496 | 98.0120073  | 0.695941092  | 0.0045822   | up   | PXK          |              |
| BAIAP2L2     | 8.324453482 | 37.53218864 | -2.172700957 | 0.004707236 | down | BAIAP2L2     | BAIAP2L2     |
| NUBP1        | 657.947571  | 437.2707508 | 0.589445777  | 0.0047105   | up   | NUBP1        | NUBP1        |
| TAB3         | 1082.340355 | 601.4068991 | 0.84774092   | 0.004714345 | up   | TAB3         | TAB3         |
| IGDCC4       | 58.41026664 | 169.8648868 | -1.540093784 | 0.004725411 | down | IGDCC4       | IGDCC4       |
| LOC107056301 | 39.61638738 | 16.39611671 | 1.272743163  | 0.004727132 | up   | LOC107056301 |              |
| YES1         | 852.5637025 | 434.6659807 | 0.971900448  | 0.004730634 | up   | YES1         | YES1         |
| PN01         | 221.1236012 | 363.9581323 | -0.718919484 | 0.004804012 | down | PN01         | PN01         |
| MCM9         | 37.56687785 | 71.91496992 | -0.936830896 | 0.004804706 | down | MCM9         |              |
| DPF3         | 14.12389599 | 1.864015636 | 2.921652235  | 0.004816047 | up   | DPF3         | DPF3         |
| CITED2       | 13.84631173 | 44.36111082 | -1.679793758 | 0.004881629 | down | CITED2       | CITED2       |
| DLG1         | 1415.914353 | 773.3947984 | 0.872457034  | 0.004890155 | up   | DLG1         | xp_005269350 |
| ASNS         | 3913.339855 | 1350.380886 | 1.535034018  | 0.004926328 | up   | ASNS         | ASNS         |
| NFIL3        | 1549.087925 | 587.7228171 | 1.398211219  | 0.004929686 | up   | NFIL3        | NFIL3        |
| LOC101748260 | 98.41371128 | 149.1022632 | -0.599370922 | 0.00498083  | down | LOC101748260 |              |

|              |             |             |              |             |      |              |              |
|--------------|-------------|-------------|--------------|-------------|------|--------------|--------------|
| SFMBT2       | 118.801021  | 67.81147062 | 0.808945997  | 0.004983297 | up   | SFMBT2       |              |
| DCP1B        | 49.10972962 | 100.6952685 | -1.03591511  | 0.005055047 | down | DCP1B        | DCP1B        |
| UNC119B      | 981.4367296 | 1576.107302 | -0.683398588 | 0.0050608   | down | UNC119B      | MLEC         |
| HPS4         | 180.1258243 | 347.9074035 | -0.949698348 | 0.005063498 | down | HPS4         | HPS4         |
| VNN1         | 2284.733714 | 1166.393293 | 0.969971699  | 0.005104366 | up   | VNN1         | VNN1         |
| ARHGAP11A    | 164.2054687 | 101.1043463 | 0.699657158  | 0.005120116 | up   | ARHGAP11A    | xp_005254864 |
| PSAP         | 8024.244998 | 5182.723206 | 0.63065531   | 0.005134295 | up   | PSAP         | PSAP         |
| SMYD3        | 52.98092751 | 21.30106202 | 1.314547739  | 0.005143193 | up   | SMYD3        | SMYD3        |
| LOC100858951 | 16.34504533 | 51.14836358 | -1.645834705 | 0.005268702 | down | LOC100858951 | PHYHD1       |
| LOC107055795 | 17.71985299 | 56.63517805 | -1.676331804 | 0.005304814 | down | LOC107055795 |              |
| ACPP         | 580.1199177 | 204.6609912 | 1.503115005  | 0.005320455 | up   | ACPP         | ACPP         |
| OIP5         | 65.83467703 | 36.46734102 | 0.852242682  | 0.00532443  | up   | OIP5         | OIP5         |
| LOC107050883 | 7.256424173 | 24.60297959 | -1.76150235  | 0.005400117 | down | LOC107050883 |              |
| LOC107056873 | 62.34876637 | 25.65319198 | 1.281222666  | 0.005414849 | up   | LOC107056873 |              |
| RPS6KA6      | 405.3472593 | 181.1568084 | 1.161919362  | 0.005541906 | up   | RPS6KA6      | RPS6KA6      |
| DOK3         | 8.321536767 | 67.89842431 | -3.028456209 | 0.005632651 | down | DOK3         | xp_005266040 |
| ATP10D       | 30.71005127 | 67.69636252 | -1.140367396 | 0.005640083 | down | ATP10D       | ATP10D       |
| NUCB2        | 5731.121384 | 3217.26233  | 0.832983877  | 0.005660821 | up   | NUCB2        | NUCB2        |
| GORASP1      | 1402.114872 | 725.8400817 | 0.949880919  | 0.005672522 | up   | GORASP1      | GORASP1      |
| CDC23        | 119.7293847 | 268.8660667 | -1.167110416 | 0.005684668 | down | CDC23        | CDC23        |
| ZNF407       | 474.0646739 | 306.217133  | 0.630528887  | 0.005858578 | up   | ZNF407       |              |
| PDK4         | 181.4591707 | 78.0104163  | 1.217906294  | 0.005918717 | up   | PDK4         | PDK4         |
| TPBG         | 161.4120873 | 274.7882009 | -0.767571439 | 0.005929056 | down | TPBG         | TPBG         |
| CYB5R4       | 149.396799  | 67.24187776 | 1.151717319  | 0.005956549 | up   | CYB5R4       | CYB5R4       |
| AKT3         | 475.3860418 | 251.4532968 | 0.918809075  | 0.005995034 | up   | AKT3         | AKT3         |
| RCBTB2       | 119.2449965 | 237.8691323 | -0.996239337 | 0.006013268 | down | RCBTB2       | RCBTB2       |
| EXOC3        | 1151.679536 | 567.8719797 | 1.020101699  | 0.006023308 | up   | EXOC3        | EXOC3        |
| SHQ1         | 369.0371411 | 166.6259329 | 1.147153068  | 0.006052537 | up   | SHQ1         | SHQ1         |
| LOC107055056 | 30.88328603 | 65.64506911 | -1.087860382 | 0.006128888 | down | LOC107055056 |              |
| ZC3H7B       | 648.0494018 | 1511.862821 | -1.222151541 | 0.006187123 | down | ZC3H7B       | ZC3H7B       |
| PTPN21       | 1189.356448 | 553.4943031 | 1.103540781  | 0.006189628 | up   | PTPN21       | PTPN21       |
| LOC769660    | 117.721598  | 243.6050107 | -1.049164777 | 0.006252422 | down | LOC769660    |              |
| VRK2         | 157.8155301 | 260.1087057 | -0.720875504 | 0.006269011 | down | VRK2         | VRK2         |
| BRCC3        | 169.0272328 | 323.5670619 | -0.936809049 | 0.006272382 | down | BRCC3        | BRCC3        |
| JAKMIP2      | 46.53874577 | 111.762753  | -1.263935228 | 0.006340632 | down | JAKMIP2      | JAKMIP2      |
| UBXN10       | 34.46422271 | 69.03537375 | -1.002236311 | 0.00634531  | down | UBXN10       | UBXN10       |
| TRMT61A      | 95.03228673 | 160.7091576 | -0.75796249  | 0.006347685 | down | TRMT61A      | TRMT61A      |
| SBDS         | 1922.711254 | 835.1567374 | 1.203023235  | 0.006491016 | up   | SBDS         | SBDS         |
| LOC419662    | 58.91275538 | 242.923008  | -2.043847203 | 0.006496995 | down | LOC419662    |              |
| SNX16        | 189.1674355 | 105.3036947 | 0.8451077    | 0.006501213 | up   | SNX16        | SNX16        |
| DENND6A      | 256.7269067 | 127.6188098 | 1.008393523  | 0.00657814  | up   | DENND6A      | DENND6A      |
| CRYM         | 155.5431477 | 317.825275  | -1.030919019 | 0.006595162 | down | CRYM         | xp_005255183 |
| MED12L       | 81.79063341 | 155.6860208 | -0.928631868 | 0.006708176 | down | MED12L       |              |
| MCF2         | 41.18239376 | 79.25668805 | -0.944504992 | 0.006820644 | down | MCF2         |              |
| TAF4B        | 114.1869459 | 64.98100581 | 0.813307748  | 0.006986199 | up   | TAF4B        | xp_005258395 |
| PRPF4        | 399.6902741 | 636.6859914 | -0.671699555 | 0.007047822 | down | PRPF4        | PRPF4        |
| DUSP16       | 379.9624863 | 711.2835701 | -0.904567851 | 0.007053562 | down | DUSP16       | DUSP16       |
| LAMP1        | 5104.681898 | 3016.014925 | 0.759177493  | 0.007091112 | up   | LAMP1        | LAMP1        |
| RP11-2C24.9  | 411.1262848 | 656.4212676 | -0.67504037  | 0.007129179 | down | RP11-2C24.9  |              |
| ADCK1        | 51.17588136 | 118.6461262 | -1.213129048 | 0.007164726 | down | ADCK1        | ADCK1        |
| TAF6L        | 35.84808065 | 160.2304048 | -2.160180152 | 0.007236245 | down | TAF6L        |              |
| SCAMP1       | 427.7634826 | 215.1244546 | 0.991641793  | 0.007305637 | up   | SCAMP1       | SCAMP1       |
| SAT1         | 5822.972201 | 3660.487378 | 0.669719981  | 0.007314091 | up   | SAT1         | SAT1         |
| EPS15        | 1504.72845  | 908.1025224 | 0.728576067  | 0.007319457 | up   | EPS15        | xp_005270674 |

|              |             |             |              |             |      |              |              |
|--------------|-------------|-------------|--------------|-------------|------|--------------|--------------|
| LACTB2       | 692.00147   | 262.3300113 | 1.399392237  | 0.007387249 | up   | LACTB2       | LACTB2       |
| LOC107053494 | 284.9419992 | 122.5740002 | 1.21701529   | 0.007416861 | up   | LOC107053494 |              |
| EHHADH       | 53.30421146 | 103.9650358 | -0.963776994 | 0.007428803 | down | EHHADH       | EHHADH       |
| LOC107056604 | 3.017427812 | 64.61666522 | -4.420515135 | 0.007520309 | down | LOC107056604 |              |
| MARS2        | 70.83987276 | 194.8900217 | -1.460026701 | 0.007582503 | down | MARS2        | MARS2        |
| STX12        | 876.4663901 | 420.2055268 | 1.060603632  | 0.0075851   | up   | STX12        | STX12        |
| UBXN7        | 214.1413962 | 415.7908444 | -0.957294277 | 0.007634199 | down | UBXN7        | UBXN7        |
| LOC107050288 | 29.7955612  | 77.41971967 | -1.377603663 | 0.007711118 | down | LOC107050288 |              |
| PPIL2        | 317.7203974 | 634.7129641 | -0.998346597 | 0.007723662 | down | PPIL2        | PPIL2        |
| IQSEC3       | 32.07041195 | 64.10207045 | -0.99912807  | 0.007781842 | down | IQSEC3       | IQSEC3       |
| LOC107051875 | 95.74318973 | 270.5740399 | -1.498781651 | 0.007865517 | down | LOC107051875 |              |
| RORA         | 84.56329769 | 36.3343655  | 1.218696925  | 0.00793928  | up   | RORA         | RORA         |
| SPSB4        | 43.23044494 | 20.1601715  | 1.100539773  | 0.00805521  | up   | SPSB4        | SPSB4        |
| DNAJA4       | 1232.309665 | 654.2927588 | 0.913356625  | 0.008060528 | up   | DNAJA4       | DNAJA4       |
| GON4L        | 487.6571757 | 1207.980319 | -1.308657759 | 0.00806325  | down | GON4L        |              |
| ATP6AP2      | 1069.086993 | 506.7397461 | 1.077062355  | 0.008069587 | up   | ATP6AP2      | xp_005272630 |
| GSTCD        | 201.3400379 | 106.5612754 | 0.917950836  | 0.008074119 | up   | GSTCD        |              |
| UGP2         | 1358.473105 | 641.6392188 | 1.082151772  | 0.008409022 | up   | UGP2         | UGP2         |
| YIPF1        | 343.7121607 | 203.3810507 | 0.757015628  | 0.008420937 | up   | YIPF1        | YIPF1        |
| LOC107054608 | 57.48072933 | 97.89222056 | -0.768115847 | 0.008425881 | down | LOC107054608 |              |
| LOC107050448 | 1.846507356 | 50.35478667 | -4.769258011 | 0.00845491  | down | LOC107050448 |              |
| LRCH2        | 402.9580853 | 197.566674  | 1.028290171  | 0.008580244 | up   | LRCH2        | LRCH2        |
| LOC100858649 | 245.8235889 | 90.47767864 | 1.441989541  | 0.00860661  | up   | LOC100858649 |              |
| ZMYM3        | 78.07076799 | 318.6664951 | -2.029192974 | 0.008616573 | down | ZMYM3        |              |
| TMEM169      | 222.243152  | 379.1812343 | -0.770748601 | 0.008647337 | down | TMEM169      | TMEM169      |
| BBS4         | 41.30498042 | 73.80140896 | -0.837332612 | 0.008667571 | down | BBS4         | BBS4         |
| ELF2         | 277.7390186 | 519.4137898 | -0.903154446 | 0.008681497 | down | ELF2         | ELF2         |
| CSNK1A1      | 4199.58784  | 2410.322478 | 0.801021566  | 0.008804452 | up   | CSNK1A1      | CSNK1A1      |
| RPIA         | 336.7010849 | 199.1684588 | 0.757479176  | 0.008826366 | up   | RPIA         | RPIA         |
| KCNK1        | 610.0192435 | 327.5803664 | 0.897005863  | 0.008846075 | up   | KCNK1        | KCNK1        |
| DEPDC5       | 349.9491758 | 620.7926896 | -0.826966158 | 0.009068732 | down | DEPDC5       | DEPDC5       |
| ID4          | 391.5678127 | 692.6028039 | -0.822766049 | 0.009124948 | down | ID4          | ID4          |
| IRX1         | 12.654374   | 36.40902982 | -1.524660158 | 0.009199254 | down | IRX1         | IRX1         |
| LOC107049214 | 22.05299035 | 52.08030353 | -1.239763561 | 0.009227455 | down | LOC107049214 |              |
| DGKH         | 178.4237789 | 100.1300411 | 0.833433021  | 0.009314392 | up   | DGKH         | DGKH         |
| DDEFL1       | 7.608590524 | 39.00086227 | -2.357804894 | 0.00941436  | down | DDEFL1       | ASAP1        |
| CCBL1        | 86.6503301  | 202.825627  | -1.226962798 | 0.009435498 | down | CCBL1        | xp_005252352 |
| ADARB1       | 693.9157467 | 397.8400546 | 0.802571971  | 0.009475065 | up   | ADARB1       | ADARB1       |
| LOC107057546 | 0.317723722 | 24.11641241 | -6.246098687 | 0.009497523 | down | LOC107057546 |              |
| GP5          | 25.42258451 | 56.58907529 | -1.154412858 | 0.009558939 | down | GP5          |              |
| LOC107054579 | 1.475218825 | 11.43976204 | -2.955056166 | 0.009635408 | down | LOC107054579 |              |
| FOXO1        | 322.8968462 | 154.8524835 | 1.060178829  | 0.009759612 | up   | FOXO1        | FOXO1        |
| LOC107054531 | 23.54163453 | 152.5702191 | -2.696186986 | 0.009865785 | down | LOC107054531 |              |
| CBX8         | 41.30162697 | 78.54502077 | -0.927321207 | 0.009910307 | down | CBX8         |              |
| TEAD1        | 2802.123297 | 1181.550479 | 1.245839171  | 0.010001371 | up   | TEAD1        | xp_005253150 |
| SPAG9        | 1115.05362  | 740.4111515 | 0.590714558  | 0.010058159 | up   | SPAG9        | SPAG9        |
| ZNF502       | 9.365632085 | 32.27020284 | -1.784754376 | 0.010238188 | down | ZNF502       | ZSCAN2       |
| GPCPD1       | 634.1926757 | 300.3647679 | 1.078205618  | 0.010328457 | up   | GPCPD1       | xp_005260816 |
| LYSMD2       | 327.4105102 | 142.9695964 | 1.195392255  | 0.010379627 | up   | LYSMD2       | LYSMD2       |
| NRBF2        | 420.9174764 | 215.5394497 | 0.965585464  | 0.010398256 | up   | NRBF2        | NRBF2        |
| LOC107052787 | 32.04180275 | 4.716072299 | 2.764297579  | 0.010474316 | up   | LOC107052787 |              |
| RIC1         | 754.7053387 | 408.2726522 | 0.886380547  | 0.010537155 | up   | RIC1         |              |
| TP53BP1      | 456.3644934 | 756.0240264 | -0.728245534 | 0.010570615 | down | TP53BP1      | TP53BP1      |
| ATRNL1       | 481.1607038 | 307.8735897 | 0.644180709  | 0.010653343 | up   | ATRNL1       | ATRNL1       |

|              |             |             |              |             |      |              |              |
|--------------|-------------|-------------|--------------|-------------|------|--------------|--------------|
| PIGL         | 77.22880138 | 35.63359594 | 1.11590091   | 0.010706656 | up   | PIGL         |              |
| LOC100859013 | 120.7415058 | 237.529561  | -0.976185372 | 0.010725667 | down | LOC100859013 | MMAB         |
| LOC107049790 | 3.232260387 | 17.40955497 | -2.429263995 | 0.010823063 | down | LOC107049790 |              |
| CASZ1        | 222.2885131 | 133.8644425 | 0.731660599  | 0.010845727 | up   | CASZ1        | CASZ1        |
| NAMPT        | 1201.023565 | 423.6589366 | 1.503289251  | 0.010891057 | up   | NAMPT        | xp_005250158 |
| EPS15L1      | 826.6060971 | 507.5277539 | 0.703713288  | 0.010938444 | up   | EPS15L1      |              |
| LOC107053673 | 14.17600244 | 43.12954216 | -1.605225643 | 0.010954995 | down | LOC107053673 |              |
| CPT1A        | 756.6448096 | 310.7856797 | 1.283696188  | 0.010971895 | up   | CPT1A        | CPT1A        |
| LOC427362    | 7.09850986  | 28.48151451 | -2.004437757 | 0.011006909 | down | LOC427362    | MROH7        |
| KCNJ16       | 1149.141563 | 2142.334669 | -0.898627336 | 0.011497542 | down | KCNJ16       | KCNJ16       |
| TRIP13       | 26.22032134 | 72.82544066 | -1.473757159 | 0.011524827 | down | TRIP13       |              |
| LOC107056074 | 0.317723722 | 9.356169553 | -4.880073292 | 0.01153923  | down | LOC107056074 |              |
| RBM5         | 1023.215376 | 2613.686813 | -1.352976431 | 0.011569169 | down | RBM5         | RBM5         |
| CIDEA        | 362.5987341 | 152.0474029 | 1.253852715  | 0.011590831 | up   | CIDEA        | CIDEA        |
| UBE2D1       | 285.952837  | 108.7107637 | 1.395282427  | 0.011668958 | up   | UBE2D1       | UBE2D1       |
| MIS12        | 25.77285577 | 66.74310213 | -1.372766338 | 0.011698687 | down | MIS12        | MIS12        |
| SUPT6H       | 1163.295869 | 2201.725308 | -0.920416412 | 0.011744559 | down | SUPT6H       | SUPT6H       |
| LOC107055997 | 22.49184238 | 3.388722476 | 2.730588447  | 0.01187022  | up   | LOC107055997 |              |
| TARS         | 1761.077327 | 672.7117801 | 1.388397831  | 0.012095515 | up   | TARS         | TARS         |
| FADS2        | 1196.890755 | 2013.450265 | -0.750378358 | 0.012104077 | down | FADS2        | FADS2        |
| FAM49B       | 736.8344226 | 361.062102  | 1.029093462  | 0.012112558 | up   | FAM49B       | xp_005251021 |
| CXCR4        | 28.19511219 | 6.813468466 | 2.048983775  | 0.012116725 | up   | CXCR4        | CXCR4        |
| LOC427201    | 587.475462  | 891.6486635 | -0.601946763 | 0.012153636 | down | LOC427201    |              |
| ZCCHC10      | 450.1197613 | 174.8341065 | 1.364322251  | 0.012238472 | up   | ZCCHC10      | ZCCHC10      |
| LOC107051288 | 0.317723722 | 16.79691411 | -5.724279589 | 0.012263181 | down | LOC107051288 |              |
| BRIP1        | 134.1858881 | 61.96457396 | 1.114717409  | 0.012317091 | up   | BRIP1        | BRIP1        |
| LOC107055376 | 39.723517   | 218.8334523 | -2.461768029 | 0.012355216 | down | LOC107055376 |              |
| SHB          | 805.8576478 | 445.9763387 | 0.853557844  | 0.012388484 | up   | SHB          | SHB          |
| RLIM         | 1110.22857  | 714.1645908 | 0.636528214  | 0.012425314 | up   | RLIM         | RLIM         |
| SAMD8        | 143.1743982 | 55.30823955 | 1.372207212  | 0.012661712 | up   | SAMD8        | SAMD8        |
| LOC107055600 | 2.610238295 | 29.0995429  | -3.478743066 | 0.012750055 | down | LOC107055600 |              |
| BBS9         | 159.4085237 | 76.29076616 | 1.063148417  | 0.012805226 | up   | BBS9         |              |
| KCTD7        | 123.919628  | 67.71858235 | 0.871781042  | 0.012873323 | up   | KCTD7        | KCTD7        |
| DPYSL4       | 32.57903425 | 63.76048366 | -0.968718735 | 0.013109664 | down | DPYSL4       | DPYSL4       |
| LOC100857724 | 2.505888791 | 23.4661528  | -3.227187041 | 0.013114198 | down | LOC100857724 | xp_005277413 |
| RPP25L       | 242.6193528 | 402.1841975 | -0.729161764 | 0.01345309  | down | RPP25L       |              |
| PRKCB        | 5.715673544 | 24.92399657 | -2.124540001 | 0.013585917 | down | PRKCB        |              |
| LOC107051503 | 0.635447444 | 10.04782714 | -3.98296693  | 0.013624455 | down | LOC107051503 |              |
| MCM3         | 285.6120682 | 814.5520619 | -1.511949971 | 0.013931059 | down | MCM3         | MCM3         |
| SLC25A36     | 577.849594  | 244.4274968 | 1.241287439  | 0.013993262 | up   | SLC25A36     | SLC25A36     |
| MBOAT2       | 226.2633621 | 95.49752848 | 1.244467693  | 0.014012916 | up   | MBOAT2       | MBOAT2       |
| TREM-B2      | 9.35366509  | 47.97542565 | -2.358691928 | 0.014092351 | down | TREM-B2      |              |
| WRN          | 323.6236046 | 488.0379415 | -0.592676472 | 0.014139972 | down | WRN          | xp_005273689 |
| SRRM4        | 4.784978011 | 18.61331268 | -1.95975064  | 0.014300319 | down | SRRM4        | SRRM4        |
| ITGA6        | 4165.120056 | 2108.963069 | 0.981824249  | 0.014423716 | up   | ITGA6        | ITGA6        |
| ISY1         | 514.2067587 | 272.8149308 | 0.91442597   | 0.014448664 | up   | ISY1         | ISY1-RAB43   |
| RYR1         | 20.55529589 | 74.89095798 | -1.865281405 | 0.014467975 | down | RYR1         |              |
| IMPA2        | 201.5116777 | 99.6147636  | 1.016431966  | 0.014474466 | up   | IMPA2        | IMPA2        |
| LOC107052159 | 90.8223363  | 353.0834291 | -1.95889006  | 0.014551319 | down | LOC107052159 |              |
| GEM          | 69.674349   | 24.21460729 | 1.524750012  | 0.014630157 | up   | GEM          | GEM          |
| TJAP1        | 174.8778852 | 496.1034389 | -1.504293098 | 0.014654069 | down | TJAP1        |              |
| LOC107049528 | 24.5771163  | 82.4259694  | -1.745783299 | 0.014709099 | down | LOC107049528 |              |
| PEX5         | 445.0637847 | 779.3794193 | -0.808313724 | 0.014713068 | down | PEX5         | PEX5         |
| RIMBP3C      | 8.00672976  | 42.22604111 | -2.398847975 | 0.014723513 | down | RIMBP3C      |              |

|              |             |             |              |             |      |              |              |
|--------------|-------------|-------------|--------------|-------------|------|--------------|--------------|
| SLC7A11      | 159.6181078 | 72.39242512 | 1.140713674  | 0.014943226 | up   | SLC7A11      | SLC7A11      |
| CMTM3        | 1425.870708 | 800.7297812 | 0.8324558    | 0.014988267 | up   | CMTM3        | CMTM3        |
| CDC73        | 1599.111096 | 831.7042458 | 0.94312767   | 0.015046231 | up   | CDC73        | CDC73        |
| SCML2        | 168.7519803 | 86.49239699 | 0.964259207  | 0.015206872 | up   | SCML2        | SCML2        |
| LOC107057347 | 138.9882067 | 317.4216395 | -1.19143801  | 0.01525046  | down | LOC107057347 |              |
| LOC107053186 | 73.78885206 | 320.9798115 | -2.121007783 | 0.015274298 | down | LOC107053186 |              |
| LOC417551    | 123.4168391 | 71.53659592 | 0.786785877  | 0.015306969 | up   | LOC417551    |              |
| LOC107054900 | 56.30587054 | 189.0127909 | -1.747126615 | 0.015333143 | down | LOC107054900 |              |
| LOC421935    | 54.40390328 | 94.09613814 | -0.79042535  | 0.015347985 | down | LOC421935    |              |
| CDH6         | 53.17941801 | 23.33317728 | 1.188485216  | 0.015625615 | up   | CDH6         | CDH6         |
| DSCC1        | 38.11723457 | 15.54933163 | 1.293590885  | 0.015719416 | up   | DSCC1        | DSCC1        |
| MLXIPL       | 4.365821499 | 19.63516709 | -2.169114824 | 0.015725669 | down | MLXIPL       | MLXIPL       |
| C5H14ORF105  | 8.867518417 | 57.0975867  | -2.686827443 | 0.015755065 | down | C5H14ORF105  | xp_005267862 |
| DHX57        | 253.2075635 | 382.2327641 | -0.594130948 | 0.015786455 | down | DHX57        | DHX57        |
| ELK3         | 2339.40222  | 3816.349695 | -0.706053443 | 0.015987618 | down | ELK3         | ELK3         |
| RBPJ         | 490.1573753 | 207.4730964 | 1.240320761  | 0.016049301 | up   | RBPJ         | RBPJ         |
| LOC770022    | 30.00148009 | 6.395838772 | 2.2298282    | 0.016058609 | up   | LOC770022    | HIST2H3A     |
| FCSD2        | 104.640339  | 171.8650292 | -0.715836898 | 0.016229976 | down | FCSD2        |              |
| GPR37L1      | 16.36416751 | 77.05888687 | -2.235421136 | 0.016232311 | down | GPR37L1      | GPR37L1      |
| CCSAP        | 49.27245575 | 23.40301418 | 1.074087025  | 0.016386327 | up   | CCSAP        |              |
| HARS2        | 71.53882032 | 178.8205982 | -1.321714696 | 0.016752165 | down | HARS2        | HARS         |
| LOC107056309 | 111.995564  | 36.41882456 | 1.620685325  | 0.017060121 | up   | LOC107056309 |              |
| CAPNS2       | 75.90274672 | 43.89800634 | 0.789996674  | 0.017066806 | up   | CAPNS2       | CAPNS2       |
| LOC107051392 | 7.189434012 | 26.78718066 | -1.897592642 | 0.01715997  | down | LOC107051392 |              |
| AVD          | 915.4139206 | 1610.842476 | -0.815319284 | 0.017196664 | down | AVD          |              |
| VPS54        | 802.8559502 | 460.6629393 | 0.801429623  | 0.017257672 | up   | VPS54        | VPS54        |
| LOC107052740 | 153.8716182 | 41.21328561 | 1.900545762  | 0.017337236 | up   | LOC107052740 |              |
| CA2          | 213.1301217 | 135.6350646 | 0.652004309  | 0.017459728 | up   | CA2          | CA2          |
| CDR2L        | 77.0711872  | 195.8301873 | -1.345339655 | 0.017470845 | down | CDR2L        | CDR2L        |
| LOC107053244 | 8.209595339 | 25.44900098 | -1.632226007 | 0.017564728 | down | LOC107053244 |              |
| UGDH         | 1641.555019 | 735.011074  | 1.159225213  | 0.017578606 | up   | UGDH         | xp_005262725 |
| MGA          | 662.7208475 | 1192.032106 | -0.846949885 | 0.017663486 | down | MGA          |              |
| NMT2         | 644.6848465 | 276.4546167 | 1.221551408  | 0.017809827 | up   | NMT2         | NMT2         |
| OAT          | 2637.386349 | 1146.687931 | 1.201636108  | 0.017892909 | up   | OAT          | xp_005269925 |
| SLC2A3       | 688.1365308 | 327.1870988 | 1.07257897   | 0.017988977 | up   | SLC2A3       | SLC2A3       |
| LRP3         | 108.6717945 | 186.3137784 | -0.777756828 | 0.018102769 | down | LRP3         | LRP3         |
| TRIB1        | 249.9103831 | 482.1740221 | -0.948143082 | 0.018112967 | down | TRIB1        |              |
| EEF1E1       | 1424.038374 | 535.1303355 | 1.412025804  | 0.01815897  | up   | EEF1E1       | EEF1E1       |
| GCC2         | 745.155336  | 389.1850921 | 0.937084755  | 0.018266004 | up   | GCC2         | GCC2         |
| PSPH         | 97.85325573 | 30.52452749 | 1.680650889  | 0.018284689 | up   | PSPH         | PSPH         |
| LOC107055669 | 119.5424129 | 47.06480611 | 1.344802011  | 0.018305594 | up   | LOC107055669 |              |
| KCNB1        | 48.76135346 | 98.38210086 | -1.012657692 | 0.018388747 | down | KCNB1        | KCNB1        |
| DR1          | 466.6421432 | 238.9825684 | 0.965411215  | 0.018590187 | up   | DR1          | DR1          |
| LOC107057238 | 4.365821499 | 21.74636694 | -2.316449346 | 0.018680513 | down | LOC107057238 |              |
| KLHL42       | 185.2438195 | 92.97457455 | 0.994517263  | 0.018701198 | up   | KLHL42       | KLHL42       |
| YPEL5        | 498.0570851 | 178.9908991 | 1.476424873  | 0.018813832 | up   | YPEL5        | xp_005264423 |
| TSC22D2      | 1379.66015  | 863.0675124 | 0.676767612  | 0.018945358 | up   | TSC22D2      | TSC22D2      |
| GTF2E1       | 359.4531748 | 577.0383529 | -0.682863365 | 0.019229317 | down | GTF2E1       | xp_005247458 |
| STK3         | 313.4298795 | 167.4441016 | 0.904463163  | 0.01928085  | up   | STK3         | STK3         |
| ACP5         | 5.116127086 | 67.24001999 | -3.716196147 | 0.019284533 | down | ACP5         |              |
| LOC101748428 | 55.46755752 | 196.7338372 | -1.826529011 | 0.019312225 | down | LOC101748428 |              |
| CTDSPL       | 1586.838191 | 931.2479469 | 0.76891778   | 0.019398638 | up   | CTDSPL       | CTDSPL       |
| ARL6IP5      | 2214.036748 | 1134.535587 | 0.964577305  | 0.019743566 | up   | ARL6IP5      | ARL6IP5      |
| RHOBTB1      | 302.459735  | 115.9203379 | 1.383609391  | 0.019866742 | up   | RHOBTB1      | RHOBTB1      |

|              |             |             |              |             |      |              |              |
|--------------|-------------|-------------|--------------|-------------|------|--------------|--------------|
| FBRS1        | 338.5403274 | 218.5134746 | 0.631605454  | 0.019893721 | up   | FBRS1        |              |
| CCL5         | 151.9652644 | 64.76480994 | 1.230459555  | 0.02013651  | up   | CCL5         | CCL5         |
| SMIM14       | 178.3975131 | 71.05817346 | 1.328022994  | 0.020149297 | up   | C40RF34      | SMIM14       |
| BNIP2        | 850.5449551 | 308.8557421 | 1.461454338  | 0.02014958  | up   | BNIP2        | BNIP2        |
| SPATA7       | 110.0571108 | 68.73367063 | 0.67916345   | 0.020324079 | up   | SPATA7       | SPATA7       |
| TMEM135      | 511.5096327 | 196.335241  | 1.381442258  | 0.020649168 | up   | TMEM135      | TMEM135      |
| FCN2         | 1.655608772 | 10.79565365 | -2.705016896 | 0.020655714 | down | FCN2         | FCN1         |
| TAF1         | 867.5004519 | 1319.275279 | -0.604809214 | 0.020886595 | down | TAF1         |              |
| LOC107052100 | 40.4933815  | 70.9461749  | -0.809038779 | 0.02088675  | down | LOC107052100 |              |
| PRDM16       | 2.92650366  | 17.32661022 | -2.565739445 | 0.021273006 | down | PRDM16       | PRDM16       |
| LOC107049302 | 1.882408342 | 48.59904515 | -4.690276445 | 0.021282755 | down | LOC107049302 |              |
| MIR181B2     | 0.305756727 | 18.71468496 | -5.935642713 | 0.021290211 | down | MIR181B2     |              |
| UBE2J1       | 832.6549361 | 499.6252595 | 0.736872329  | 0.021503884 | up   | UBE2J1       | UBE2J1       |
| GTF3C3       | 97.73039586 | 160.4620413 | -0.715352815 | 0.021514923 | down | GTF3C3       | GTF3C3       |
| LOC107051384 | 1.792942547 | 14.72794378 | -3.038154861 | 0.021554423 | down | LOC107051384 |              |
| C6ORF57      | 286.4033559 | 131.3097104 | 1.125074789  | 0.021945504 | up   | C6ORF57      | SDHAF4       |
| FAM154B      | 11.59831168 | 2.043640952 | 2.504701157  | 0.02196399  | up   | FAM154B      |              |
| COG4         | 370.5947956 | 851.9997409 | -1.201010371 | 0.022152902 | down | COG4         | COG4         |
| LOC107056212 | 10.70643385 | 1.140822665 | 3.230331565  | 0.022359543 | up   | LOC107056212 |              |
| PLCB2        | 24.4173069  | 55.74318962 | -1.190891468 | 0.022545167 | down | PLCB2        | PLCB2        |
| PDZD2        | 33.97105745 | 62.74083939 | -0.885098704 | 0.022614097 | down | PDZD2        | PDZD2        |
| LOC107050556 | 5.324689494 | 78.58076868 | -3.883406977 | 0.022627233 | down | LOC107050556 |              |
| TUSC3        | 60.56077223 | 30.87915427 | 0.971750361  | 0.022649992 | up   | TUSC3        | TUSC3        |
| STAB1        | 95.39526185 | 377.8781876 | -1.985931727 | 0.022708125 | down | STAB1        | STAB1        |
| TNFRSF11B    | 837.4273468 | 513.8313674 | 0.704669067  | 0.022856734 | up   | TNFRSF11B    | TNFRSF11B    |
| LOC101747844 | 19.71844123 | 5.257294101 | 1.90715316   | 0.022860152 | up   | LOC101747844 | xp_005258420 |
| ZAK          | 1453.501823 | 935.9872438 | 0.634972107  | 0.022923276 | up   | ZAK          | ZAK          |
| LOC107054540 | 44.57460015 | 109.3188617 | -1.294248581 | 0.022956383 | down | LOC107054540 |              |
| LOC107051099 | 1.883866699 | 10.82712118 | -2.522880906 | 0.022976936 | down | LOC107051099 |              |
| ANKS3        | 261.9300196 | 694.8504037 | -1.407520994 | 0.023177893 | down | ANKS3        | xp_005255173 |
| LOC107056014 | 2471.022411 | 1138.711315 | 1.117706053  | 0.023411173 | up   | LOC107056014 |              |
| PROSER2      | 435.5752658 | 673.8241922 | -0.629450193 | 0.02354233  | down | C1H10ORF47   | PROSER2      |
| CARS         | 1155.461018 | 509.3062492 | 1.181863264  | 0.023579624 | up   | CARS         | CARS         |
| BNIP3L       | 1735.12113  | 841.0014673 | 1.044856159  | 0.023682621 | up   | BNIP3L       | BNIP3L       |
| LOC101750271 | 19.0470928  | 4.02206886  | 2.243561126  | 0.023696395 | up   | LOC101750271 |              |
| ZNF341       | 37.53433031 | 144.520626  | -1.944992761 | 0.02387379  | down | ZNF341       | xp_005260641 |
| MMP24        | 65.38866981 | 36.02659209 | 0.859978488  | 0.024049707 | up   | MMP24        | MMP24        |
| MRAP         | 5.28309168  | 17.75037807 | -1.748395402 | 0.024221166 | down | MRAP         | MRAP         |
| MS4A15       | 3.24427382  | 30.74328586 | -3.244324525 | 0.024262552 | down | MS4A15       | MS4A8        |
| IGSF9B       | 108.2948092 | 56.66678129 | 0.934388929  | 0.024350717 | up   | IGSF9B       | IGSF9B       |
| BCAR3        | 108.4848343 | 63.07248266 | 0.782410747  | 0.024802108 | up   | BCAR3        | BCAR3        |
| BNIP1        | 136.0493108 | 81.89461019 | 0.732289238  | 0.025191783 | up   | BNIP1        | BNIP1        |
| QRICH1       | 1235.46384  | 1953.280386 | -0.660846272 | 0.025242178 | down | QRICH1       | xp_005265306 |
| INPP4A       | 444.2571072 | 256.1587428 | 0.794356724  | 0.025375548 | up   | INPP4A       | INPP4A       |
| CNR1         | 29.19469298 | 63.57526723 | -1.122759482 | 0.025428565 | down | CNR1         | CNR1         |
| GK           | 446.0224891 | 211.1255467 | 1.079015296  | 0.02545733  | up   | GK           | GK           |
| TMLHE        | 261.4765571 | 396.6893407 | -0.601328026 | 0.025573702 | down | TMLHE        | TMLHE        |
| TUB          | 639.1859429 | 391.4449795 | 0.70742614   | 0.025717958 | up   | TUB          |              |
| RAB32        | 485.6080836 | 215.3991652 | 1.172779779  | 0.025828802 | up   | RAB32        | RAB32        |
| RASSF10      | 29.46732884 | 65.15311439 | -1.144717854 | 0.025942081 | down | RASSF10      | RASSF10      |
| CPEB4        | 216.4393075 | 114.1429367 | 0.923120944  | 0.026346129 | up   | CPEB4        | CPEB4        |
| PKIA         | 54.87486611 | 14.29872054 | 1.940259455  | 0.026473746 | up   | PKIA         | PKIA         |
| NCKAP1       | 3843.082458 | 2346.424133 | 0.711800117  | 0.026780217 | up   | NCKAP1       | NCKAP1       |
| GOLIM4       | 431.6277543 | 656.4538929 | -0.60490605  | 0.026948093 | down | GOLIM4       |              |

|              |             |             |              |             |      |              |              |
|--------------|-------------|-------------|--------------|-------------|------|--------------|--------------|
| CEP57        | 74.6549008  | 137.2272755 | -0.878258387 | 0.027073456 | down | CEP57        | CEP57        |
| LOC107051357 | 5.75157453  | 63.34458492 | -3.461192432 | 0.027149255 | down | LOC107051357 |              |
| DCP1A        | 469.2356027 | 213.0081559 | 1.13940381   | 0.027237885 | up   | DCP1A        | DCP1A        |
| ARPP19       | 2075.132768 | 942.7519792 | 1.138253465  | 0.027274989 | up   | ARPP19       | ARPP19       |
| ARHGAP29     | 604.2073626 | 373.4649584 | 0.694070881  | 0.027396881 | up   | ARHGAP29     | xp_005271406 |
| MEIS1        | 402.299916  | 651.1794951 | -0.694783835 | 0.027419634 | down | MEIS1        | MEIS1        |
| LOC107055609 | 50.01414779 | 19.02099885 | 1.394743247  | 0.027624497 | up   | LOC107055609 |              |
| LOC107055629 | 0.317723722 | 20.81981452 | -6.034040596 | 0.02781777  | down | LOC107055629 |              |
| LOC107050675 | 2.813103875 | 15.73206649 | -2.483473458 | 0.027850334 | down | LOC107050675 |              |
| ATMIN        | 350.8997266 | 158.9650138 | 1.142349542  | 0.028034621 | up   | ATMIN        | ATMIN        |
| BPHL         | 31.01872471 | 12.10457595 | 1.357586834  | 0.028060693 | up   | BPHL         | BPHL         |
| SLC23A2      | 453.5417505 | 217.289821  | 1.061614771  | 0.028083263 | up   | SLC23A2      | xp_005260959 |
| LOC107050831 | 38.87103021 | 364.9264364 | -3.230838419 | 0.028160305 | down | LOC107050831 |              |
| C12H3ORF18   | 91.47558417 | 170.8133704 | -0.900962277 | 0.028189176 | down | C12H3ORF18   |              |
| LOC101751203 | 52.72992074 | 164.8720163 | -1.644652818 | 0.028363018 | down | LOC101751203 | MMP11        |
| LOC107055276 | 3.424617328 | 14.72331994 | -2.104088326 | 0.028396677 | down | LOC107055276 |              |
| SKIDA1       | 3.02793645  | 14.41313281 | -2.25097712  | 0.028448542 | down | C2H10ORF140  |              |
| PHLDA3       | 6.373596621 | 81.75440243 | -3.681116801 | 0.028501838 | down | PHLDA3       | PHLDA3       |
| LOC101751717 | 0.953171166 | 9.868201824 | -3.371980007 | 0.028762489 | down | LOC101751717 |              |
| LOC107056791 | 31.00035094 | 77.35525724 | -1.319214796 | 0.028775133 | down | LOC107056791 |              |
| LOC101751061 | 59.88972394 | 166.5763485 | -1.475803186 | 0.028832249 | down | LOC101751061 |              |
| PLXDC2       | 478.568239  | 285.9845752 | 0.742787317  | 0.028902417 | up   | PLXDC2       | PLXDC2       |
| CD34         | 35.39345989 | 88.92476261 | -1.329102419 | 0.028935288 | down | CD34         | CD34         |
| NAA50        | 1360.326794 | 622.6526279 | 1.127453848  | 0.029004163 | up   | NAA50        | NAA50        |
| VPS8         | 1012.008922 | 1601.501082 | -0.662202764 | 0.029190172 | down | VPS8         | xp_005247309 |
| FBX015       | 11.87152088 | 2.250177805 | 2.399393862  | 0.029209404 | up   | FBX015       | FBX015       |
| ZFAND1       | 248.8602755 | 86.41096655 | 1.526049634  | 0.029271059 | up   | ZFAND1       | ZFAND1       |
| IN080D       | 99.35111372 | 205.6331934 | -1.049465118 | 0.029432879 | down | IN080D       |              |
| LOC107050865 | 12.88890209 | 95.39259362 | -2.887747882 | 0.029438147 | down | LOC107050865 |              |
| PRDM5        | 85.48948155 | 45.5753591  | 0.907492901  | 0.02952561  | up   | PRDM5        | PRDM5        |
| GMIP         | 21.73818334 | 81.34359365 | -1.903797349 | 0.029564211 | down | GMIP         | GMIP         |
| LOC100858581 | 9.133135687 | 25.55271911 | -1.484294647 | 0.029769271 | down | LOC100858581 |              |
| LOC107050830 | 5.38452447  | 121.2806345 | -4.493386457 | 0.029775015 | down | LOC107050830 |              |
| RCAN1        | 855.5609442 | 295.8445555 | 1.532031281  | 0.029977357 | up   | RCAN1        | RCAN1        |
| DYRK3        | 875.7913208 | 550.2479902 | 0.670505182  | 0.030019039 | up   | DYRK3        | DYRK2        |
| LOC101750055 | 18.44608798 | 75.87741684 | -2.040355681 | 0.03007152  | down | LOC101750055 |              |
| FRMPD4       | 109.8799377 | 70.18233456 | 0.646748154  | 0.030468675 | up   | FRMPD4       | FRMPD4       |
| TMC3         | 314.4818823 | 481.0441691 | -0.613192464 | 0.030587293 | down | TMC3         | TMC3         |
| NUB1         | 659.1654205 | 312.6385595 | 1.076144836  | 0.031021354 | up   | NUB1         | NUB1         |
| LOC107050873 | 15.58846958 | 75.32529732 | -2.272655166 | 0.031037028 | down | LOC107050873 |              |
| IBA57        | 551.1431414 | 865.111917  | -0.650459722 | 0.031186626 | down | IBA57        | IBA57        |
| STEAP2       | 476.1351853 | 174.1695813 | 1.450878566  | 0.031266548 | up   | STEAP2       | STEAP2       |
| FOXO3        | 797.3387172 | 494.3801447 | 0.689571922  | 0.031422248 | up   | FOXO3        | FOXO3        |
| RP3-468K18.7 | 676.9910813 | 293.2505766 | 1.207002883  | 0.031550142 | up   | RP3-468K18.7 |              |
| FBXL21       | 143.0415761 | 55.18408733 | 1.374110316  | 0.032212543 | up   | FBXL21       | xp_005266392 |
| C5H14ORF169  | 112.9107909 | 391.6860434 | -1.794514351 | 0.032257912 | down | C5H14ORF169  | C14orf169    |
| CXADR        | 1916.370064 | 729.4461547 | 1.39350279   | 0.032282153 | up   | CXADR        | CXADR        |
| HS3ST2       | 0.635447444 | 8.601509057 | -3.758745076 | 0.032376398 | down | HS3ST2       |              |
| FAM168B      | 936.9698074 | 395.7465661 | 1.243425727  | 0.032399466 | up   | FAM168B      | FAM168B      |
| CXXC4        | 16.85031419 | 69.26351553 | -2.039320123 | 0.032461527 | down | CXXC4        |              |
| FRS3         | 258.4172583 | 575.312442  | -1.154643248 | 0.03254552  | down | FRS3         | FRS3         |
| LRPPRC       | 1922.056863 | 986.5740147 | 0.962151824  | 0.032581141 | up   | LRPPRC       | LRPPRC       |
| CLK4         | 756.1644964 | 360.4173657 | 1.069031588  | 0.032615304 | up   | CLK4         | CLK4         |
| PLEKHA3      | 849.0101687 | 362.4918504 | 1.227833273  | 0.032882617 | up   | PLEKHA3      | PLEKHA3      |



|                |              |              |               |              |      |                |              |
|----------------|--------------|--------------|---------------|--------------|------|----------------|--------------|
| LOC107052454   | 11. 07056719 | 56. 75434988 | -2. 358001831 | 0. 032956687 | down | LOC107052454   |              |
| LEMD2          | 821. 2011595 | 1449. 53689  | -0. 81978448  | 0. 033147377 | down | LEMD2          | LEMD2        |
| ERGIC1         | 3354. 27667  | 1733. 298385 | 0. 952481658  | 0. 033260502 | up   | ERGIC1         |              |
| PACSIN2        | 2842. 293941 | 1341. 408764 | 1. 083306828  | 0. 033311239 | up   | PACSIN2        | PACSIN2      |
| ATG2B          | 650. 4843313 | 325. 6365197 | 0. 998251801  | 0. 033380261 | up   | ATG2B          |              |
| CAMTA1         | 438. 7697186 | 766. 902417  | -0. 805579054 | 0. 033642399 | down | CAMTA1         | CAMTA1       |
| CD1B           | 2. 493921795 | 13. 34449289 | -2. 419756352 | 0. 033698579 | down | CD1B           | CD1B         |
| VILL           | 123. 4261896 | 324. 5363622 | -1. 394731582 | 0. 033721826 | down | VILL           | VIL1         |
| LOC769755      | 68. 77212606 | 136. 4440535 | -0. 988413668 | 0. 033754349 | down | LOC769755      | NIPA2        |
| RBMS3          | 556. 5906984 | 213. 3614041 | 1. 383317575  | 0. 034122069 | up   | RBMS3          | RBMS3        |
| RP11-463D19. 2 | 228. 0641698 | 90. 57884734 | 1. 332193723  | 0. 03473727  | up   | RP11-463D19. 2 |              |
| GOLGB1         | 1004. 201202 | 2779. 452653 | -1. 468752449 | 0. 034824325 | down | GOLGB1         |              |
| FAM185A        | 277. 0187652 | 129. 4581241 | 1. 097498204  | 0. 034969998 | up   | FAM185A        |              |
| CHCHD5         | 379. 009748  | 677. 1230508 | -0. 837183078 | 0. 035019048 | down | CHCHD5         | CHCHD5       |
| LOC107052014   | 7. 700973033 | 34. 62015768 | -2. 168499646 | 0. 035378992 | down | LOC107052014   |              |
| UBE2E1         | 673. 2426337 | 394. 5275369 | 0. 77100054   | 0. 035527506 | up   | UBE2E1         | UBE2E1       |
| ZBTB7A         | 89. 13418    | 310. 5816422 | -1. 800921889 | 0. 035687741 | down | ZBTB7A         | ZBTB7A       |
| RUNX2          | 203. 0633737 | 131. 1918755 | 0. 630251667  | 0. 035808145 | up   | RUNX2          | RUNX2        |
| LOC101750701   | 131. 5095331 | 218. 3669407 | -0. 731587074 | 0. 035808796 | down | LOC101750701   |              |
| XKR8           | 8. 891452407 | 64. 27341534 | -2. 85373113  | 0. 035822468 | down | XKR8           | XKR8         |
| WDR91          | 246. 2189634 | 596. 6900219 | -1. 277039772 | 0. 036531283 | down | WDR91          | WDR91        |
| PIP5K1B        | 122. 6129688 | 59. 59998389 | 1. 040727735  | 0. 03674314  | up   | PIP5K1B        | PIP5K1B      |
| SENP8          | 142. 6021392 | 352. 5315    | -1. 30575655  | 0. 036791588 | down | SENP8          | SENP8        |
| DISC1          | 186. 5970635 | 114. 6712542 | 0. 702422501  | 0. 036838122 | up   | DISC1          | DISC1        |
| GMFB           | 953. 4197986 | 363. 6346248 | 1. 390622007  | 0. 036941811 | up   | GMFB           | GMFB         |
| LOC428971      | 14. 0611443  | 67. 55228153 | -2. 26429049  | 0. 036945703 | down | LOC428971      | SLC2A9       |
| LOC107053887   | 13. 18269182 | 2. 19642259  | 2. 58541743   | 0. 037048794 | up   | LOC107053887   |              |
| LCT            | 5. 815647977 | 27. 09495407 | -2. 220012352 | 0. 03708366  | down | LCT            | LCT          |
| KLF5           | 582. 360497  | 1320. 481342 | -1. 181079514 | 0. 03714076  | down | KLF5           | KLF5         |
| SCAI           | 283. 876902  | 145. 9699769 | 0. 959593801  | 0. 037142544 | up   | SCAI           |              |
| HIST1H2B5      | 52. 27367809 | 22. 13487496 | 1. 23976345   | 0. 037186296 | up   | HIST1H2B5      | HIST2H2BE    |
| LOC107051444   | 3. 435125966 | 38. 51636951 | -3. 487036815 | 0. 037503544 | down | LOC107051444   |              |
| LOC107053327   | 271. 1108867 | 598. 8023659 | -1. 143196875 | 0. 037677865 | down | LOC107053327   |              |
| EHMT1          | 464. 6828248 | 1105. 915094 | -1. 2509224   | 0. 037847162 | down | EHMT1          | EHMT1        |
| CCNE2          | 14. 75161491 | 35. 32568681 | -1. 25984471  | 0. 038114726 | down | CCNE2          | xp_005251152 |
| HHIPL1         | 312. 5847268 | 479. 3966339 | -0. 61697249  | 0. 038153446 | down | HHIPL1         | HHIPL1       |
| SLC7A5         | 858. 4329345 | 553. 4483497 | 0. 633256743  | 0. 038216467 | up   | SLC7A5         | SLC7A5       |
| TMCO4          | 27. 52274214 | 70. 23085103 | -1. 351480702 | 0. 038228564 | down | TMCO4          | xp_005245883 |
| C16ORF45       | 278. 0582122 | 180. 6289789 | 0. 622357579  | 0. 038331816 | up   | C16ORF45       | C16orf45     |
| GJD3           | 30. 21763442 | 84. 03368884 | -1. 475577092 | 0. 038435966 | down | GJD3           |              |
| LOC107056560   | 135. 0889845 | 57. 51695152 | 1. 23185092   | 0. 038632559 | up   | LOC107056560   |              |
| LOC107054476   | 4. 083998763 | 26. 7519887  | -2. 711591809 | 0. 03878997  | down | LOC107054476   |              |
| NCOA2          | 380. 879768  | 760. 0574435 | -0. 996772803 | 0. 039057037 | down | NCOA2          |              |
| LOC107049278   | 153. 8239696 | 8. 353629013 | 4. 202733444  | 0. 039113046 | up   | LOC107049278   |              |
| DES11          | 597. 0942923 | 381. 4107655 | 0. 646613213  | 0. 039966126 | up   | DES11          | DES11        |
| DDHD2          | 918. 5039335 | 456. 0752757 | 1. 010013937  | 0. 040830039 | up   | DDHD2          |              |
| LOC100857714   | 3. 400683338 | 15. 27834542 | -2. 167591737 | 0. 040831845 | down | LOC100857714   | LY9          |
| LOC107049738   | 54. 18280054 | 162. 5520695 | -1. 584995055 | 0. 04089471  | down | LOC107049738   |              |
| RHOT1          | 755. 1084879 | 389. 3381868 | 0. 955660081  | 0. 041002034 | up   | RHOT1          | RHOT1        |
| CHST13         | 43. 38968101 | 97. 20532254 | -1. 163683332 | 0. 041070498 | down | CHST13         | CHST11       |
| FHL1           | 495. 4939818 | 314. 4272959 | 0. 656141069  | 0. 041084161 | up   | FHL1           | FHL1         |
| DEGS2          | 39. 7623347  | 17. 69890085 | 1. 167742702  | 0. 041088753 | up   | DEGS2          | DEGS2        |
| MRM1           | 61. 43688133 | 110. 6149606 | -0. 848369634 | 0. 041359162 | down | MRM1           |              |
| PDLIM3         | 856. 3320362 | 567. 6397152 | 0. 593194767  | 0. 041860016 | up   | PDLIM3         | PDLIM3       |

|               |             |             |              |             |      |               |          |
|---------------|-------------|-------------|--------------|-------------|------|---------------|----------|
| LOC101748371  | 18.55670765 | 36.70520968 | -0.984044075 | 0.042266106 | down | LOC101748371  |          |
| LOC107051218  | 1.757041562 | 11.39525452 | -2.697212925 | 0.042481628 | down | LOC107051218  |          |
| HCLS1         | 0.623480449 | 8.213001035 | -3.719493254 | 0.042657893 | down | HCLS1         | HCLS1    |
| TET1          | 198.8934108 | 113.3737897 | 0.810908331  | 0.042738879 | up   | TET1          | TET1     |
| CRYBG3        | 529.7622479 | 337.3438959 | 0.65112498   | 0.042893931 | up   | CRYBG3        | CRYBG3   |
| FAM53A        | 455.0041019 | 263.5824474 | 0.787625251  | 0.042912469 | up   | FAM53A        | FAM53A   |
| LOC101749146  | 97.42053726 | 45.95869623 | 1.083888068  | 0.043122112 | up   | LOC101749146  |          |
| MKNK2         | 754.9217701 | 323.2053819 | 1.223875929  | 0.04330497  | up   | MKNK2         |          |
| LOC107057132  | 10.69490359 | 131.7881721 | -3.623225513 | 0.043563519 | down | LOC107057132  |          |
| MIR6602       | 100.194987  | 44.18051823 | 1.181328082  | 0.043862912 | up   | MIR6602       |          |
| LOC107056628  | 299.1310441 | 161.5704292 | 0.888614464  | 0.043920348 | up   | LOC107056628  |          |
| TTPAL         | 167.8707477 | 100.3072527 | 0.742924932  | 0.043996924 | up   | TTPAL         | TTPAL    |
| PPM1A         | 2156.141184 | 1115.958404 | 0.950168395  | 0.044324803 | up   | PPM1A         | PPM1A    |
| XBP1          | 1074.2872   | 2128.880907 | -0.98671551  | 0.044359332 | down | XBP1          | XBP1     |
| ABCD3         | 1078.85349  | 429.6064288 | 1.32841147   | 0.044542405 | up   | ABCD3         | ABCD3    |
| TMEM30C       | 71.77626512 | 40.37644406 | 0.829992996  | 0.044647599 | up   | TMEM30C       |          |
| ATRIP         | 252.5484822 | 383.248056  | -0.601718102 | 0.04471758  | down | ATRIP         | ATRIP    |
| WASF3         | 123.058091  | 54.96058246 | 1.162870318  | 0.044829116 | up   | WASF3         | WASF3    |
| MYO6          | 726.2335119 | 460.2436048 | 0.658035829  | 0.044895464 | up   | MYO6          | MYO6     |
| CXXC5         | 270.3831779 | 155.494721  | 0.798139794  | 0.045046072 | up   | CXXC5         |          |
| KIF1BP        | 518.0152203 | 344.4229458 | 0.588813228  | 0.045194248 | up   | KIF1BP        |          |
| CEP85L        | 149.1977236 | 83.78684809 | 0.832429815  | 0.045241394 | up   | CEP85L        | CEP85L   |
| LOC101751422  | 813.7849529 | 3269.660724 | -2.006421433 | 0.045263238 | down | LOC101751422  |          |
| IRX2          | 19.81126047 | 83.78264447 | -2.080330748 | 0.045717886 | down | IRX2          | IRX2     |
| LOC107051872  | 40.97528971 | 90.16289382 | -1.137779671 | 0.046020614 | down | LOC107051872  |          |
| LOC107054407  | 2.72363808  | 11.80591451 | -2.115902886 | 0.04686264  | down | LOC107054407  |          |
| CHRNA7        | 32.2121208  | 13.00511624 | 1.308524355  | 0.046996636 | up   | CHRNA7        | CHRNA7   |
| CHL1          | 120.7473392 | 76.58342516 | 0.656887308  | 0.047257291 | up   | CHL1          | CHL1     |
| NFAM1         | 10.70643385 | 24.72125202 | -1.207273791 | 0.047321379 | down | NFAM1         | NFAM1    |
| LOC425623     | 48.93123477 | 327.7058602 | -2.743573878 | 0.04747306  | down | LOC425623     |          |
| LOC107051513  | 0.522047659 | 16.3908101  | -4.97256183  | 0.047927054 | down | LOC107051513  |          |
| ZNHIT6        | 310.8548053 | 124.2485827 | 1.323011485  | 0.048026003 | up   | ZNHIT6        | ZNHIT6   |
| RP5-1021120.4 | 154.6867342 | 82.1339253  | 0.913299324  | 0.048084854 | up   | RP5-1021120.4 |          |
| SMNDC1        | 1019.522954 | 527.2056845 | 0.951456426  | 0.048438312 | up   | SMNDC1        | SMNDC1   |
| LOC107056098  | 1.780975552 | 24.79032522 | -3.799037581 | 0.048484328 | down | LOC107056098  |          |
| DNAH12        | 64.97870018 | 25.94716171 | 1.32439015   | 0.048547096 | up   | DNAH12        |          |
| ACCS          | 76.8166519  | 138.1299581 | -0.846535261 | 0.048632755 | down | ACCS          | ACCSL    |
| LOC107050600  | 11.40930819 | 155.1613009 | -3.765485556 | 0.048692472 | down | LOC107050600  |          |
| KDSR          | 367.8829994 | 180.1693953 | 1.029893041  | 0.048816269 | up   | KDSR          | KDSR     |
| CBLL1         | 226.8291913 | 502.7667299 | -1.148282868 | 0.048852311 | down | CBLL1         | CBLL1    |
| RALGAP1       | 931.4671252 | 582.5694666 | 0.677074763  | 0.048862491 | up   | RALGAP1       | RALGAP1  |
| PRAM1         | 1.985299489 | 10.8585887  | -2.451408043 | 0.04911812  | down | PRAM1         | PRAM1    |
| UNKL          | 283.8643347 | 151.3458148 | 0.907352817  | 0.049336437 | up   | UNKL          | UNKL     |
| C5H15ORF52    | 8.845042783 | 31.56018558 | -1.835164662 | 0.049464294 | down | C5H15ORF52    | C15orf52 |
| INAFM2        | 59.16203059 | 121.3808646 | -1.036797527 | 0.049839442 | down | INAFM2        |          |
